# Supplementary material
Source: publisher figshare collection journal article supplement (https://acs.figshare.com/ndownloader/files/4340986)

## Supporting Information

### The Biostructural Features of Additional Jasplakinolide Analogues

*Katharine R. Watts,<sup>†</sup> Brandon Morinaka,<sup>†</sup> Taro Amagata,<sup>†</sup> Sarah J. Robinson,<sup>†</sup> Karen Tenney,<sup>†</sup> Walter M. Bray,<sup>†,‡</sup> Nadine C. Gassner,<sup>†,‡</sup> R. Scott Lokey,<sup>†,‡</sup> Joseph Media,<sup>§</sup> Frederick A. Valeriote,<sup>§</sup> Phillip Crews<sup>†\*</sup>*

<sup>†</sup>*Department of Chemistry and Biochemistry and <sup>‡</sup>UCSC Chemical Screening Center, University of California, Santa Cruz, Santa Cruz, CA 95064*

<sup>§</sup>*Department of Internal Medicine, Division of Hematology and Oncology, Henry Ford Hospital, Detroit MI 48202*

#### **Index:**

**Figure S1.** NOE spectra in CDCl<sub>3</sub> and DMSO-*d*<sub>6</sub> of **8**.

**Figure S2.** <sup>13</sup>C chemical shift differences of the hydroxy-aryl substructures.

**Figure S3.** Likely pathways for the origin of **9-11** from **1**, and **15** and **12** from **14**.

**Figure S4.** <sup>1</sup>H NMR, <sup>13</sup>C NMR, gHMQC, and gHMBC spectra of **7**.

**Figure S5.** <sup>1</sup>H NMR, <sup>13</sup>C NMR, gHMQC, and gHMBC spectra of **8**.

**Figure S6.** <sup>1</sup>H NMR, <sup>13</sup>C NMR, gHMQC, and gHMBC spectra of **9**.

**Figure S7.** <sup>1</sup>H NMR, <sup>13</sup>C NMR, gHMQC, and gHMBC spectra of **10**.

**Figure S8.** <sup>1</sup>H NMR, <sup>13</sup>C NMR, gHMQC, and gHMBC spectra of **11**.

**Figure S9.** <sup>1</sup>H NMR, <sup>13</sup>C NMR, gHMQC, and gHMBC spectra of **12**.

**Figure S10.** <sup>1</sup>H NMR, <sup>13</sup>C NMR, gHMQC, and gHMBC spectra of **13**.

**Figure S11.** <sup>1</sup>H NMR, <sup>13</sup>C NMR, gHMQC, and gHMBC spectra of **14**.

**Figure S12.** <sup>1</sup>H NMR, <sup>13</sup>C NMR, gHMQC, and gHMBC spectra of **15**.

**Table S1.** NCI 60 cell line evaluation of **1**.

**Table S2.** NCI 60 cell line evaluation of **4**.

**Table S3.** NCI 60 cell line evaluation of **5**.

**Table S4.** NCI 60 cell line evaluation of **6**.

**Table S5.** NCI 60 cell line evaluation of **7**.

**Table S6.** NCI 60 cell line evaluation of **8**.

**Table S7.** NCI 60 cell line evaluation of **9**.

**Table S8.** NCI 60 cell line evaluation of **11**.

**Table S9.** NCI 60 cell line evaluation of **12**.

**Table S10.** NCI 60 cell line evaluation of **13**.

**Table S11.** NCI 60 cell line evaluation of **14**.

**Table S12.** One dose mean graph for **15**.

**Figure S11.** Microfilament effects of **10** in HCT-116 and HeLa cells.

**Figure S12.** Above water photo of 00101.

University of California, Santa Cruz.

\*To whom correspondence should be addressed: Phone: 831-459-2603 Fax 831-459-2935 Email: phil@chemistry.ucsc.edu.

Figure S1. NOE correlations of **8** in  $\text{CDCl}_3$  and  $\text{DMSO}-d_6$

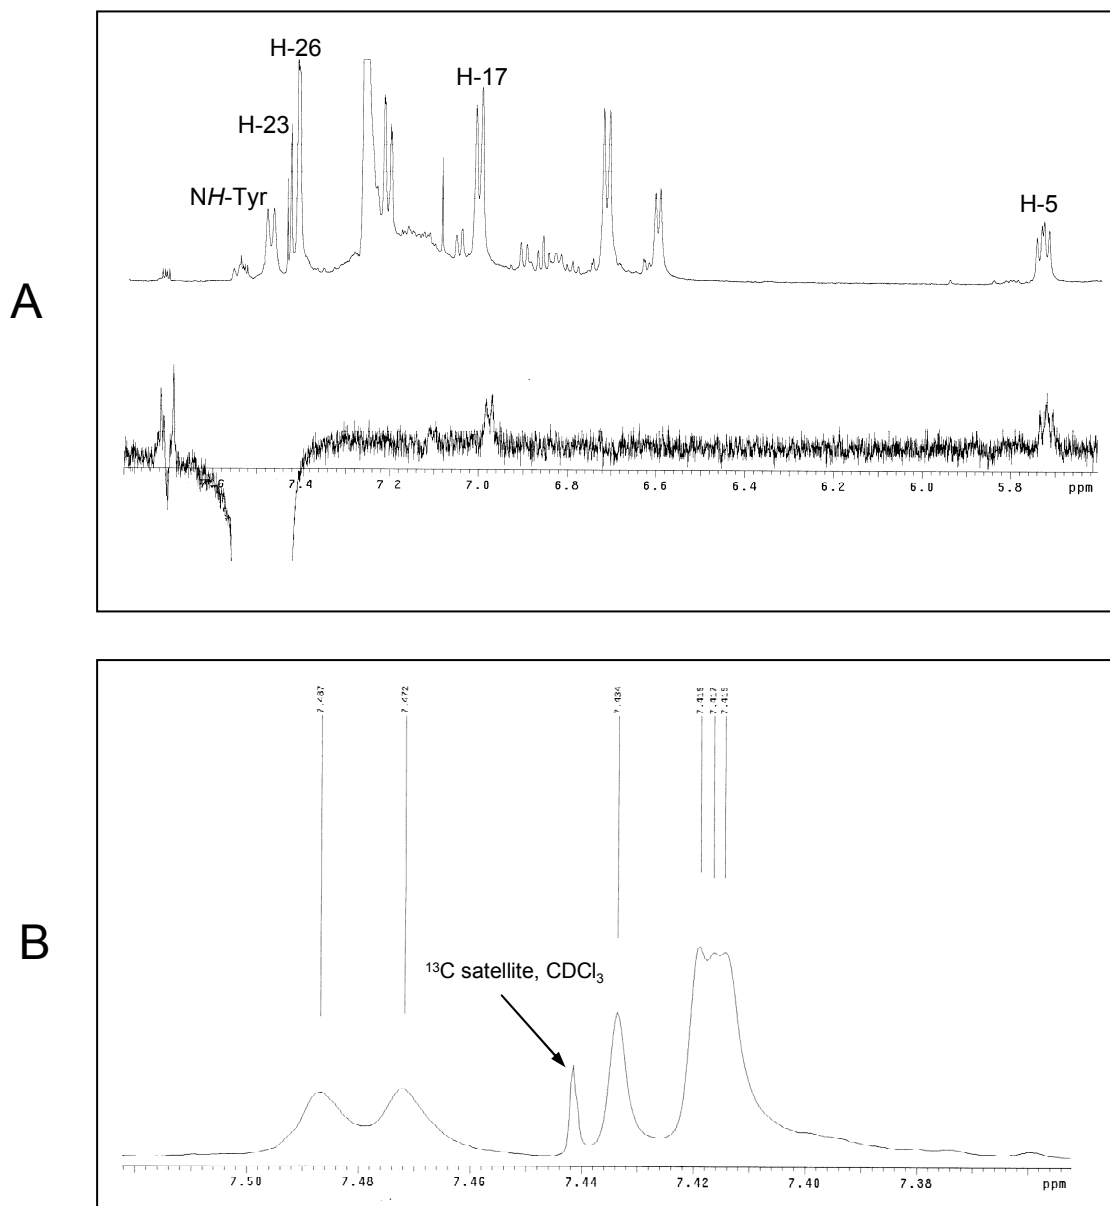

**A.** NOE in  $\text{CDCl}_3$

**B.** Blowup of  $^1\text{H}$  spectra region in  $\text{CDCl}_3$  containing *NH*-Tyr, H-23, and H-26.

C

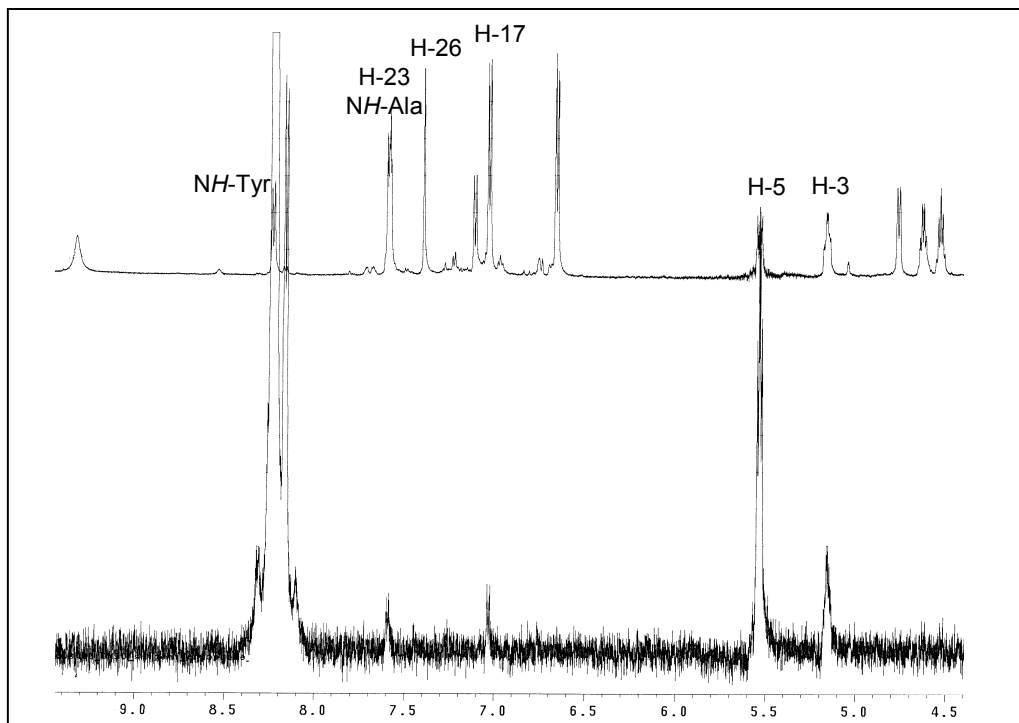

D

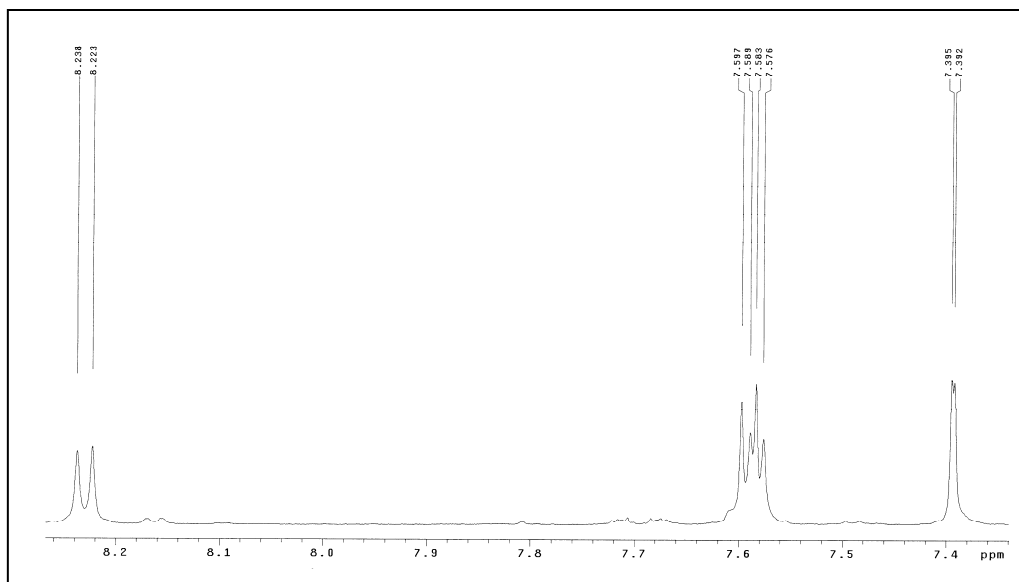

C. NOE in DMSO- $d_6$

D. Blowup of  $^1\text{H}$  spectra region in DMSO- $d_6$  containing NH-Tyr, H-23, NH-Ala and H-26.

Figure S2.  $^{13}\text{C}$  chemical shift differences of the hydroxy-aryl substructures.

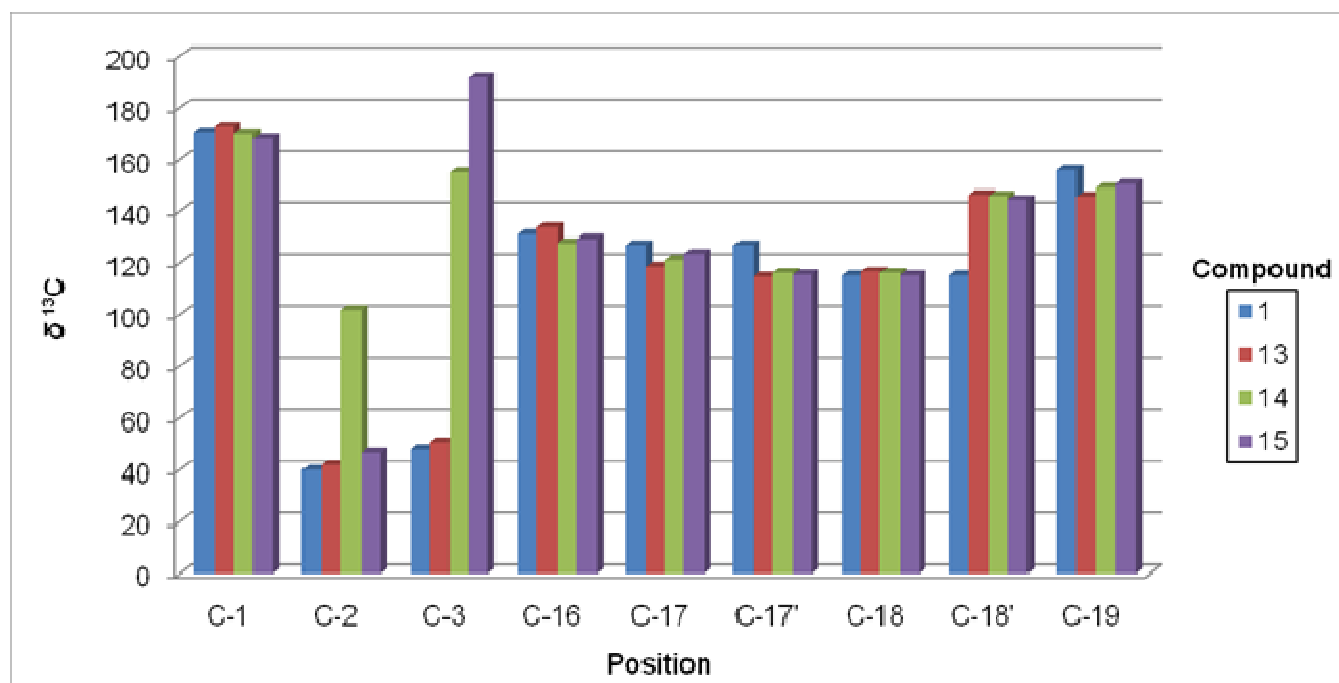

Figure S3. Likely pathways for the origin of **9-11** from **1**, and **15** and **12** from **14**.

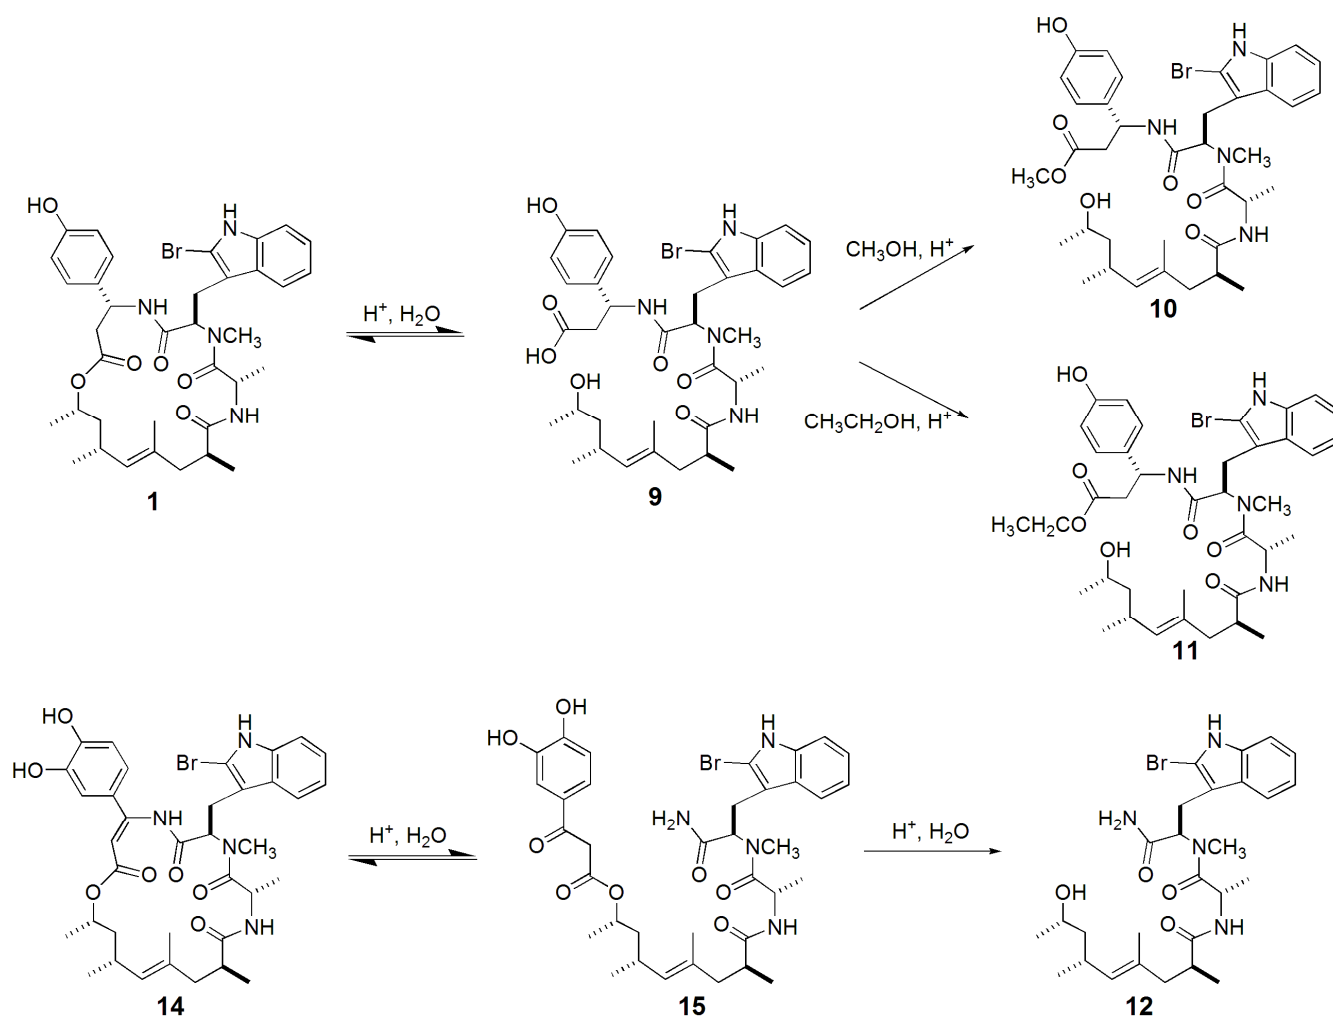

Figure S4.  $^1\text{H}$ ,  $^{13}\text{C}$ , gHMQC, and gHMBC spectra for **7** in  $\text{CD}_3\text{OD}$ .

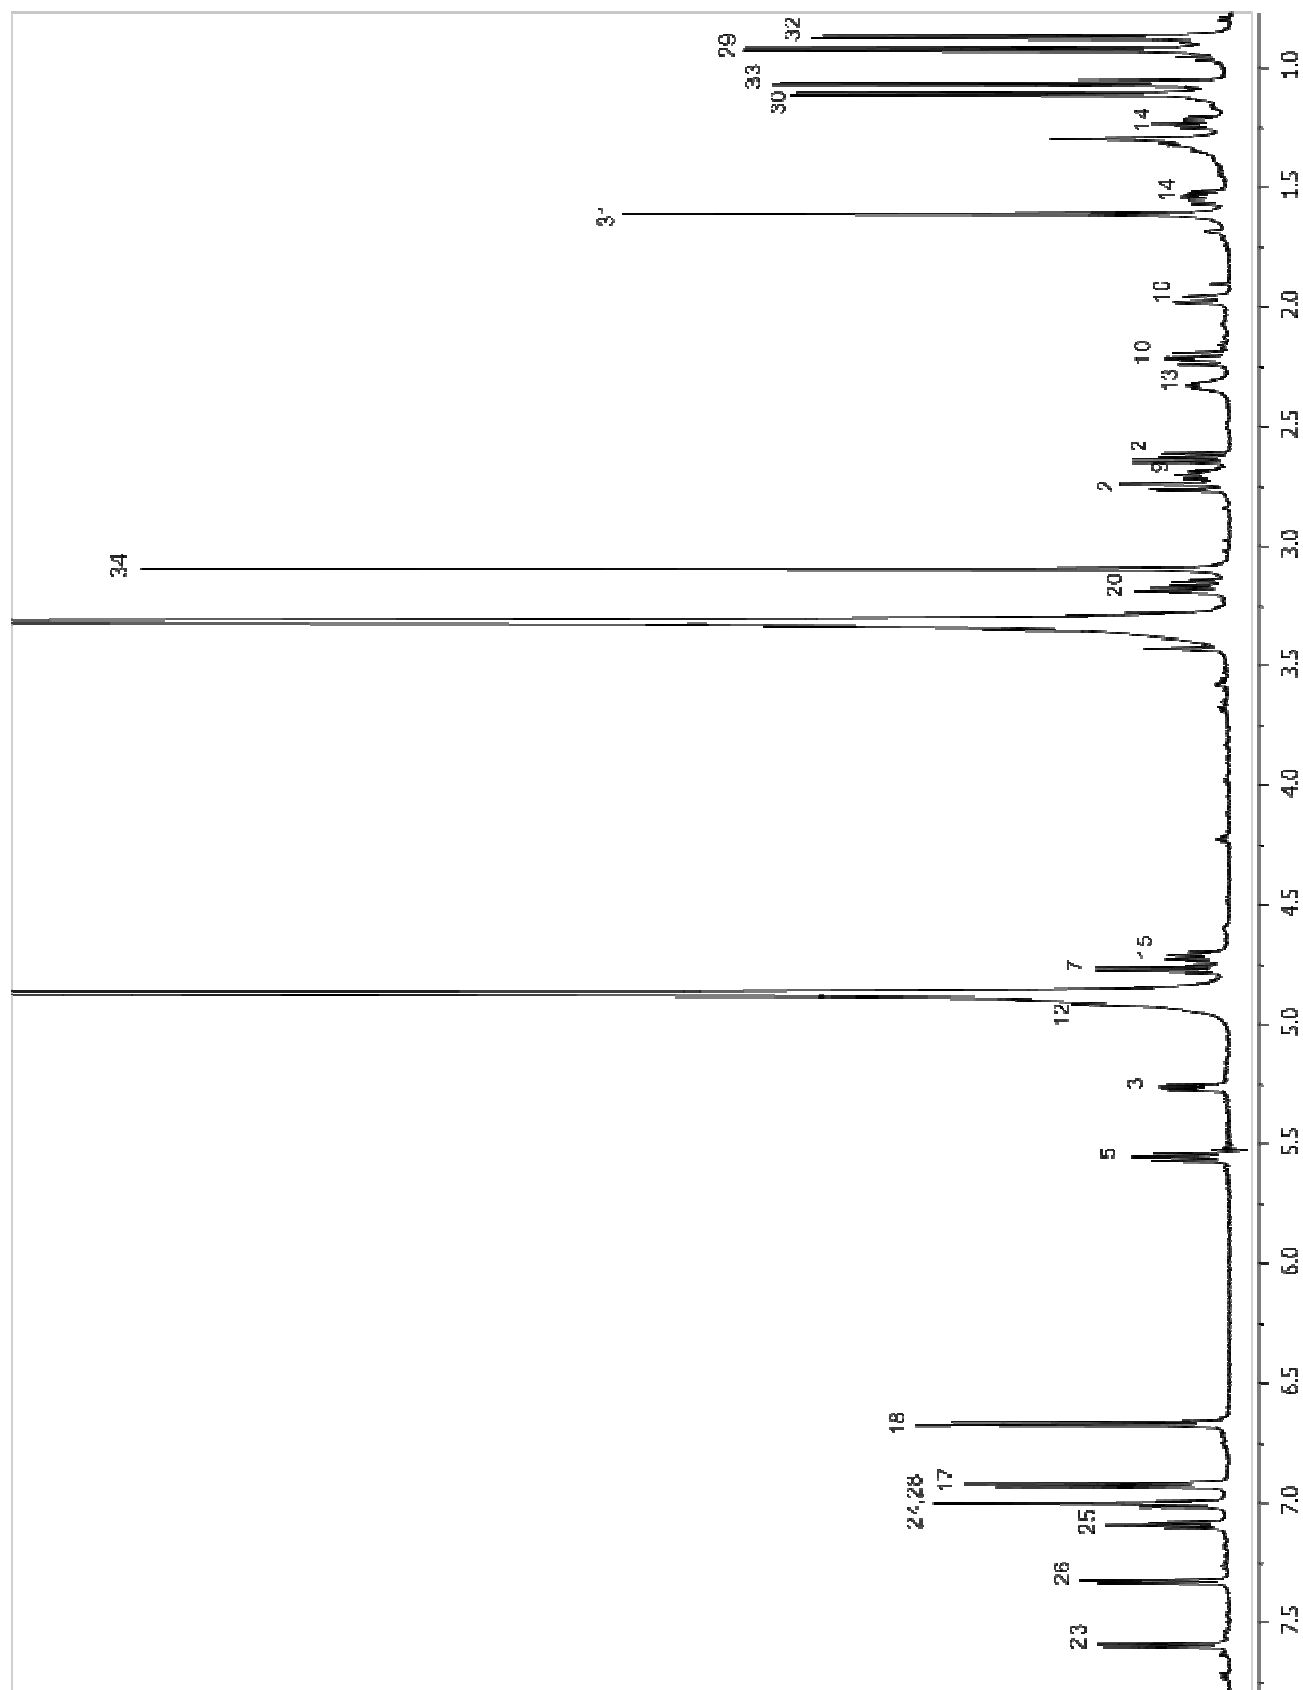

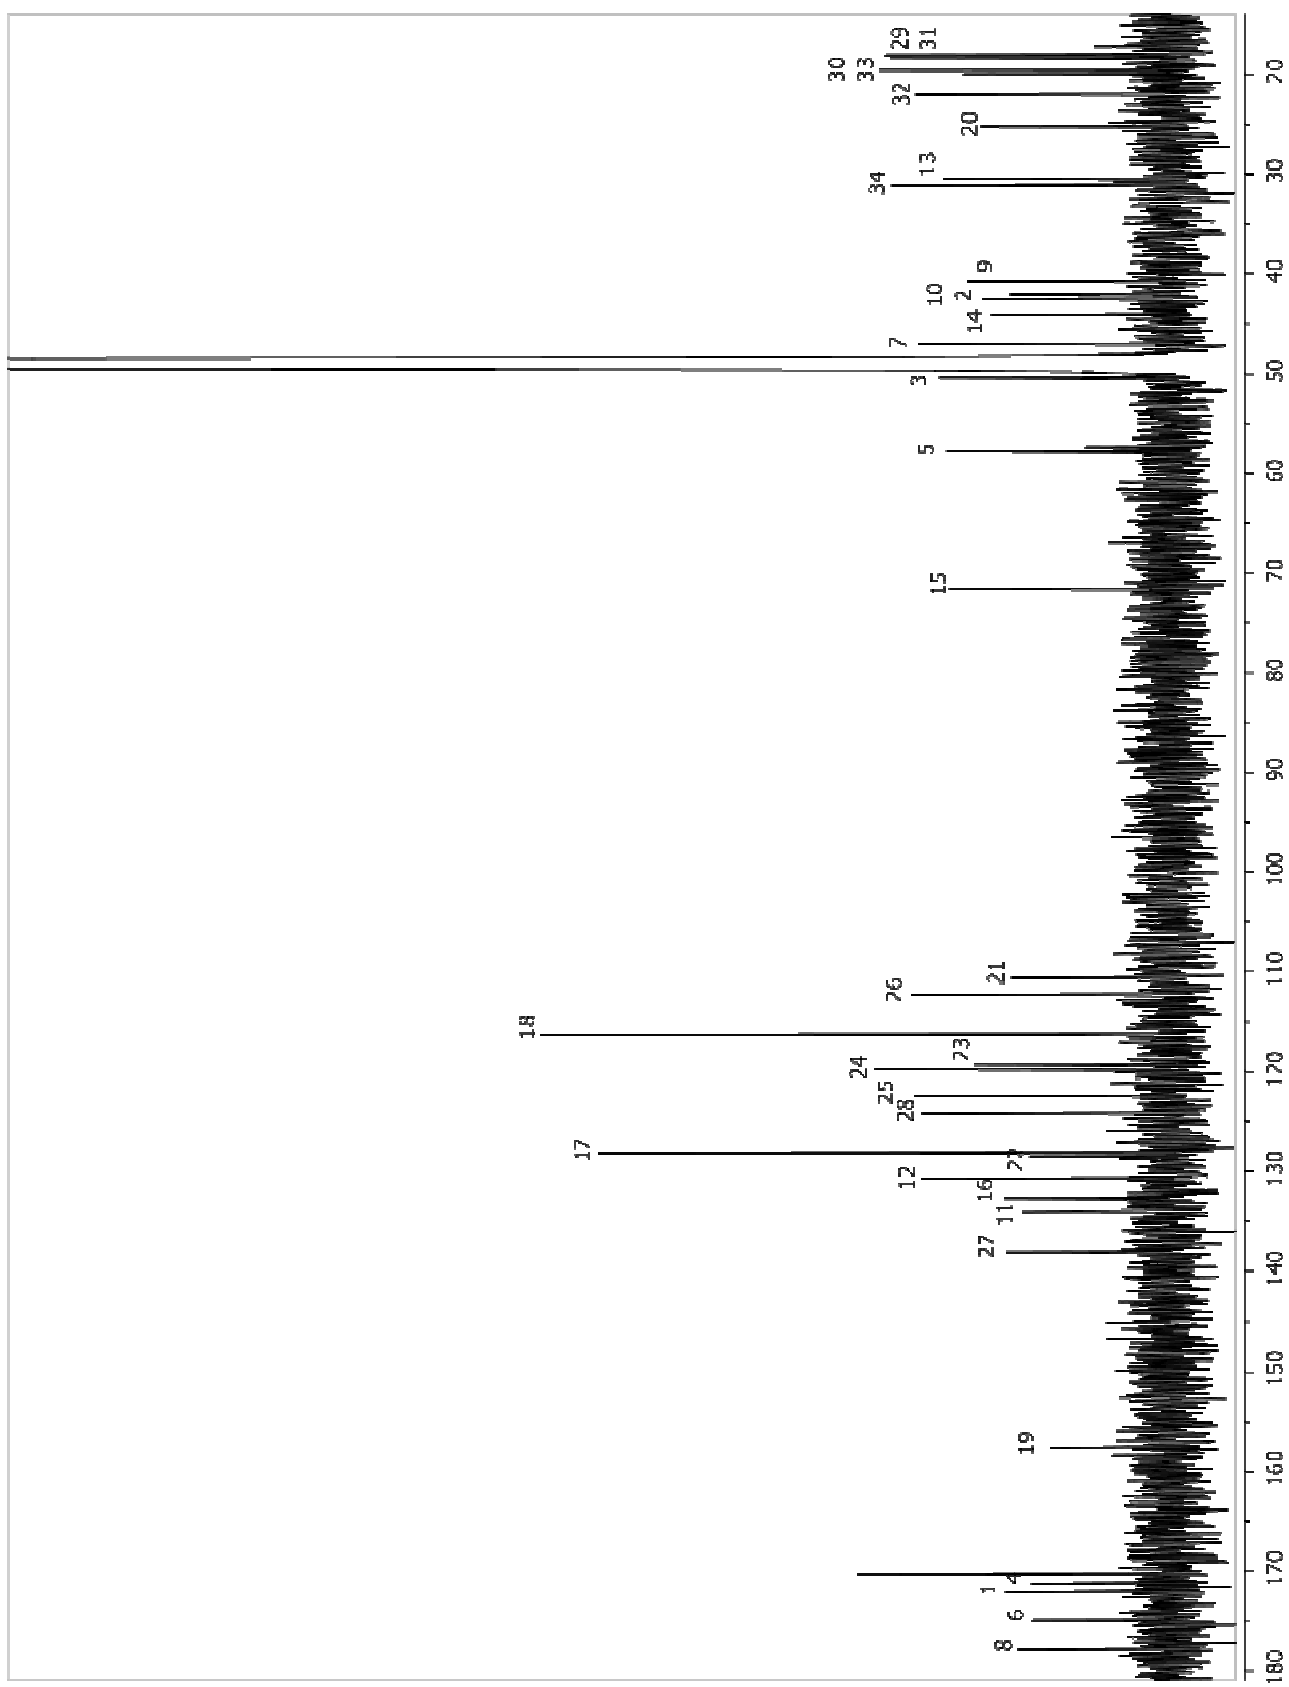

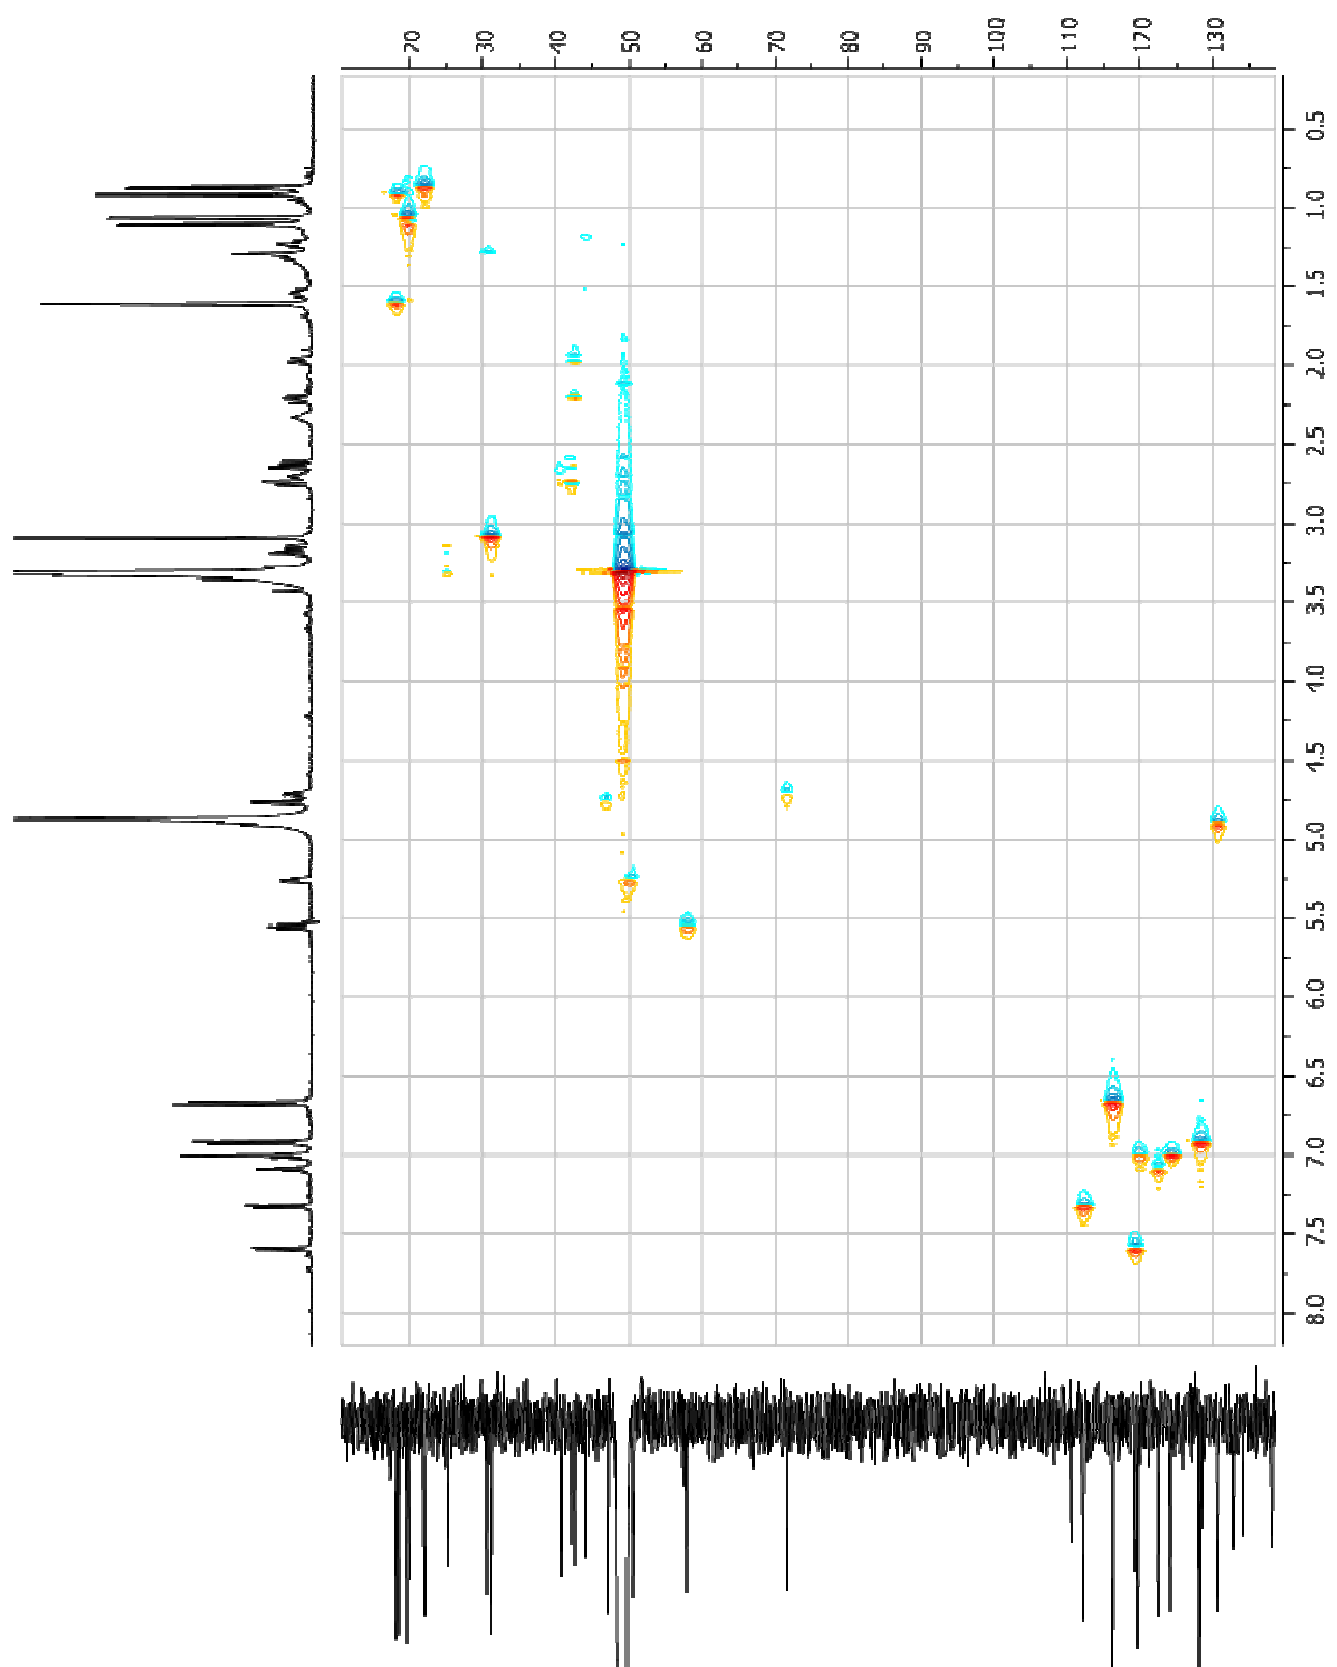



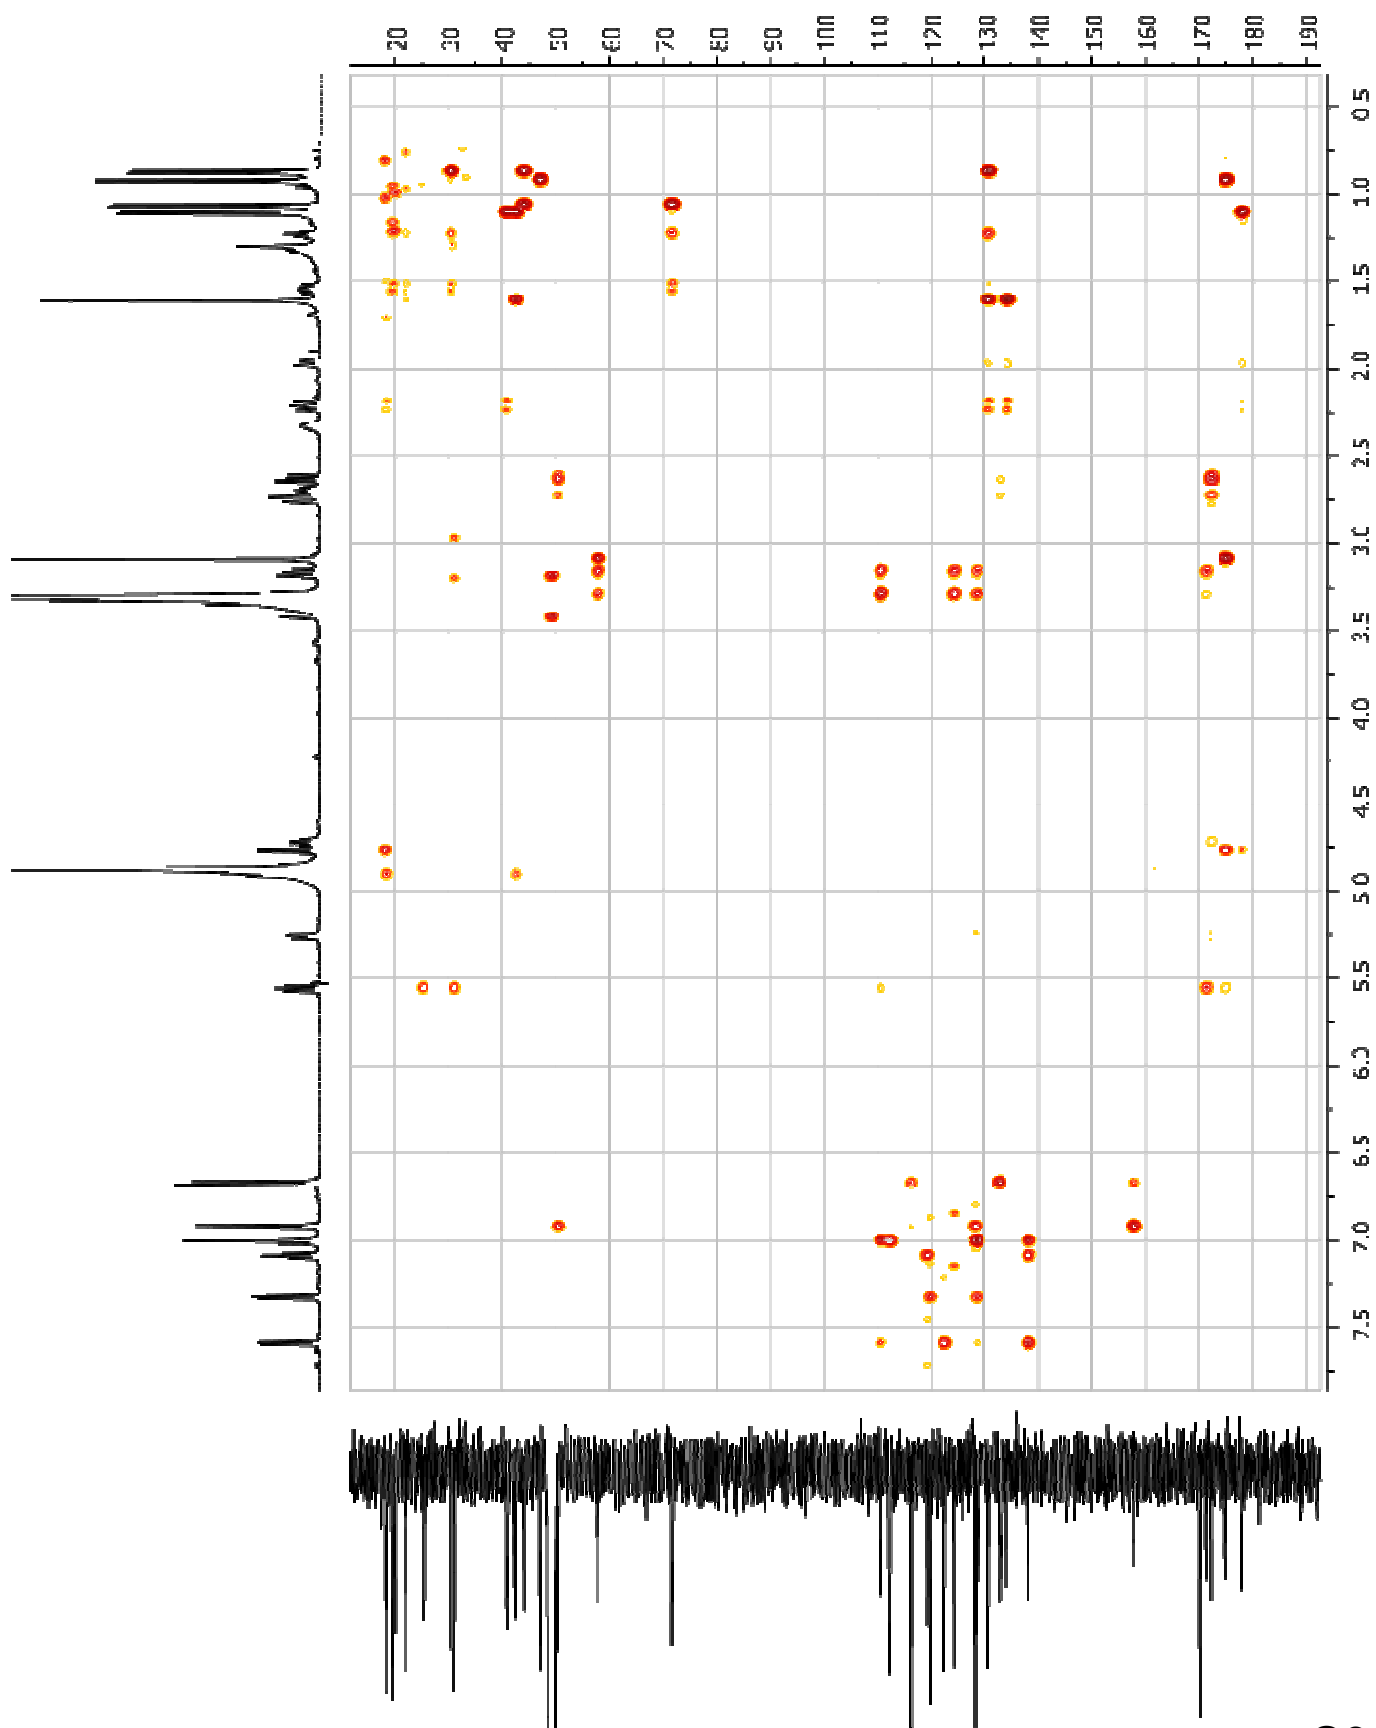

Figure S5.  $^1\text{H}$ ,  $^{13}\text{C}$ , gHMQC, and gHMBC spectra for **8** in  $\text{CD}_3\text{OD}$ .

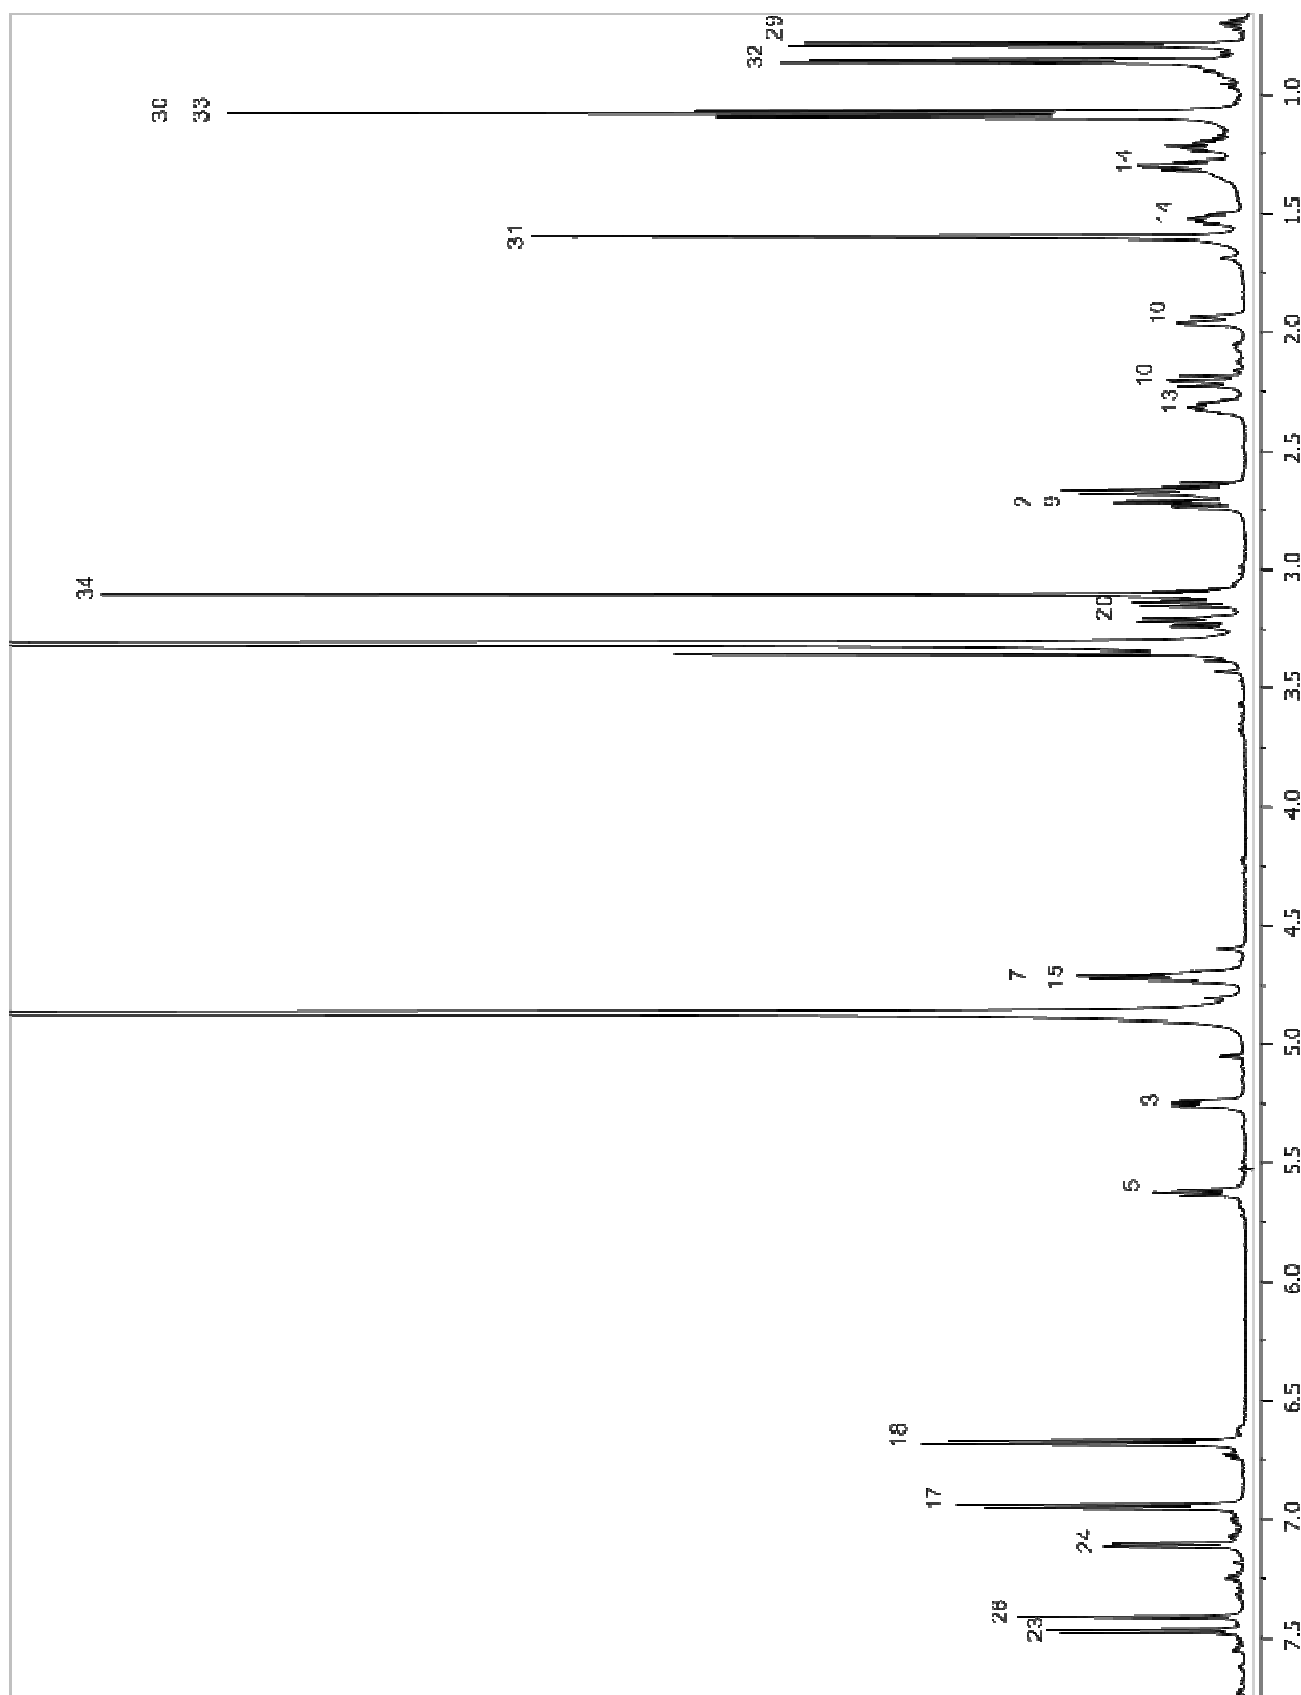

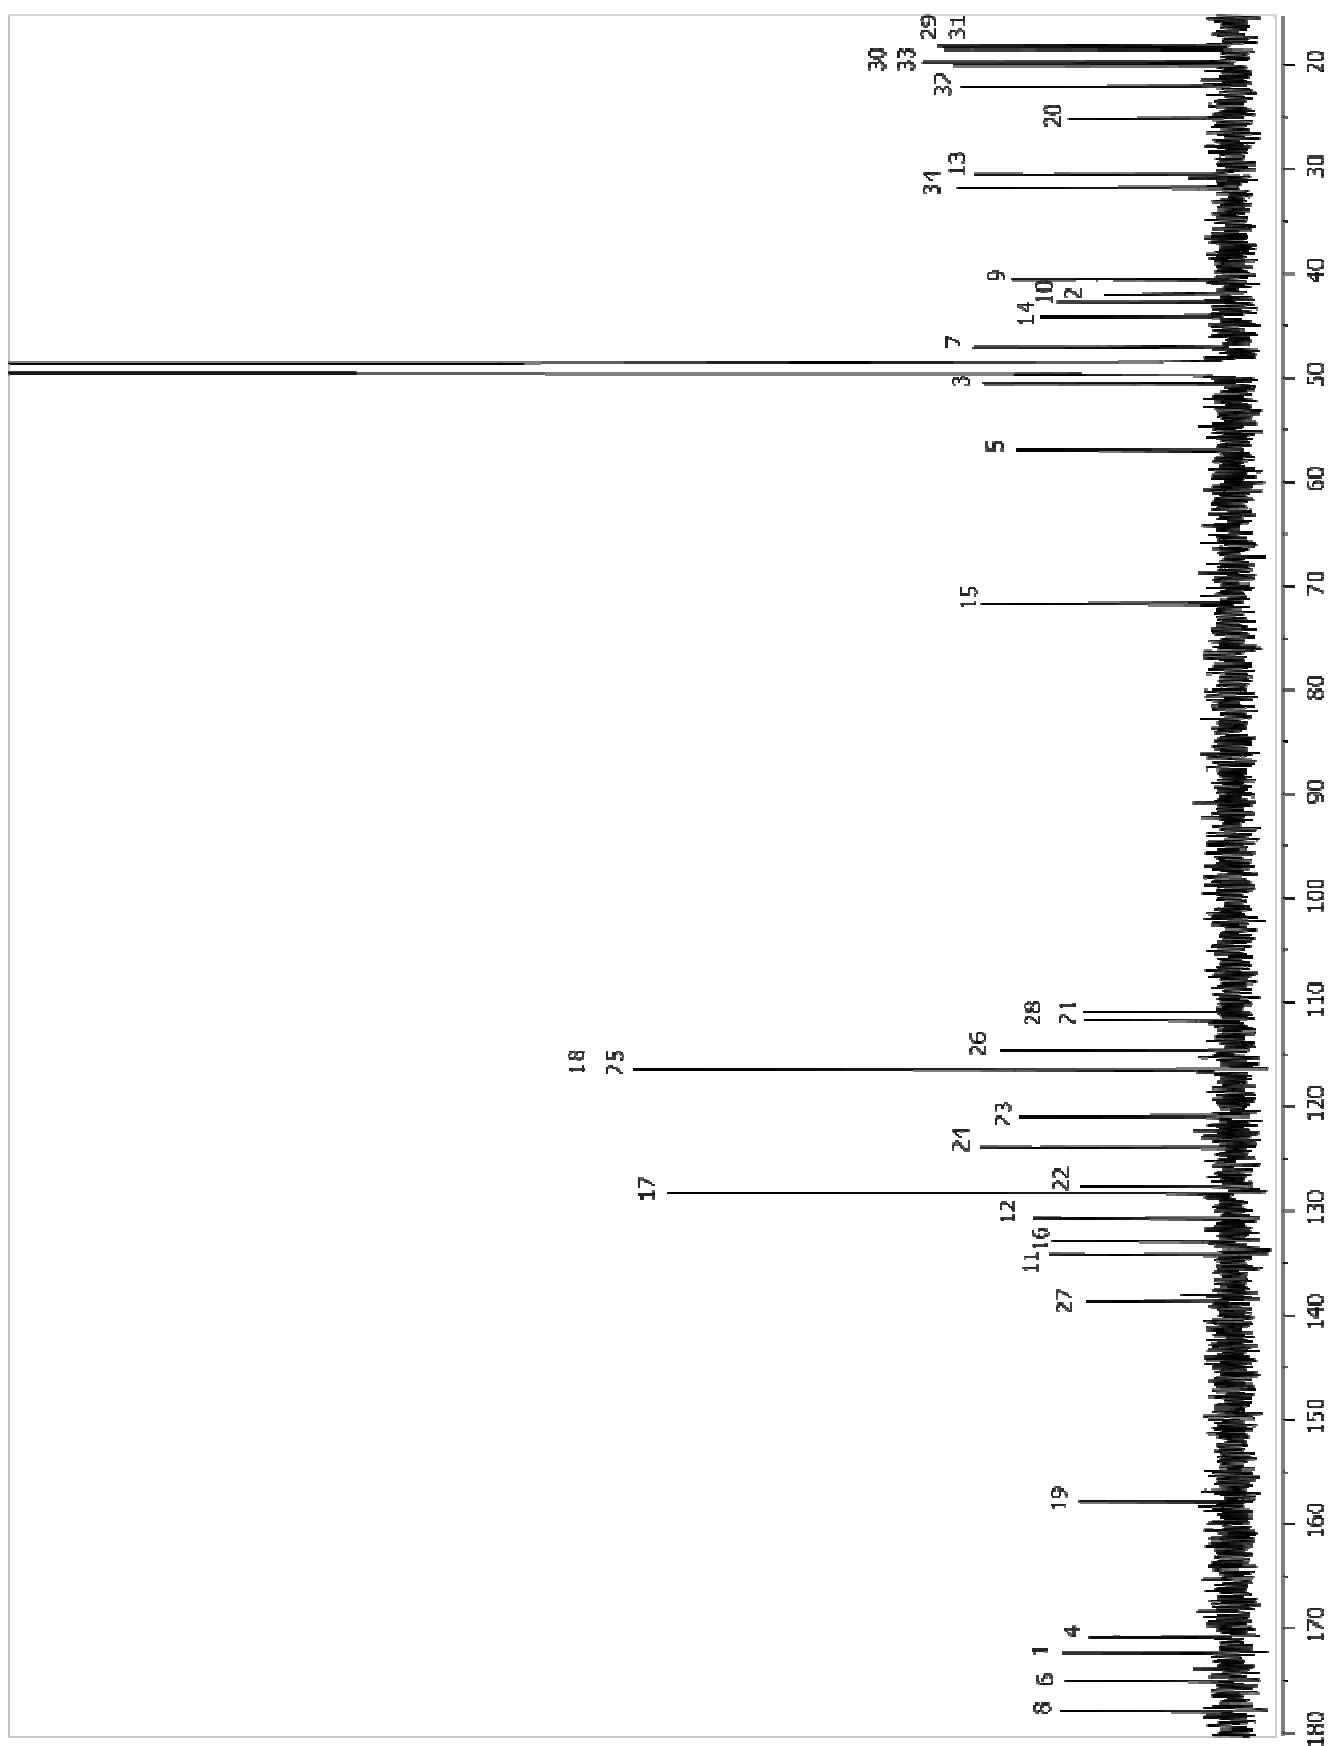

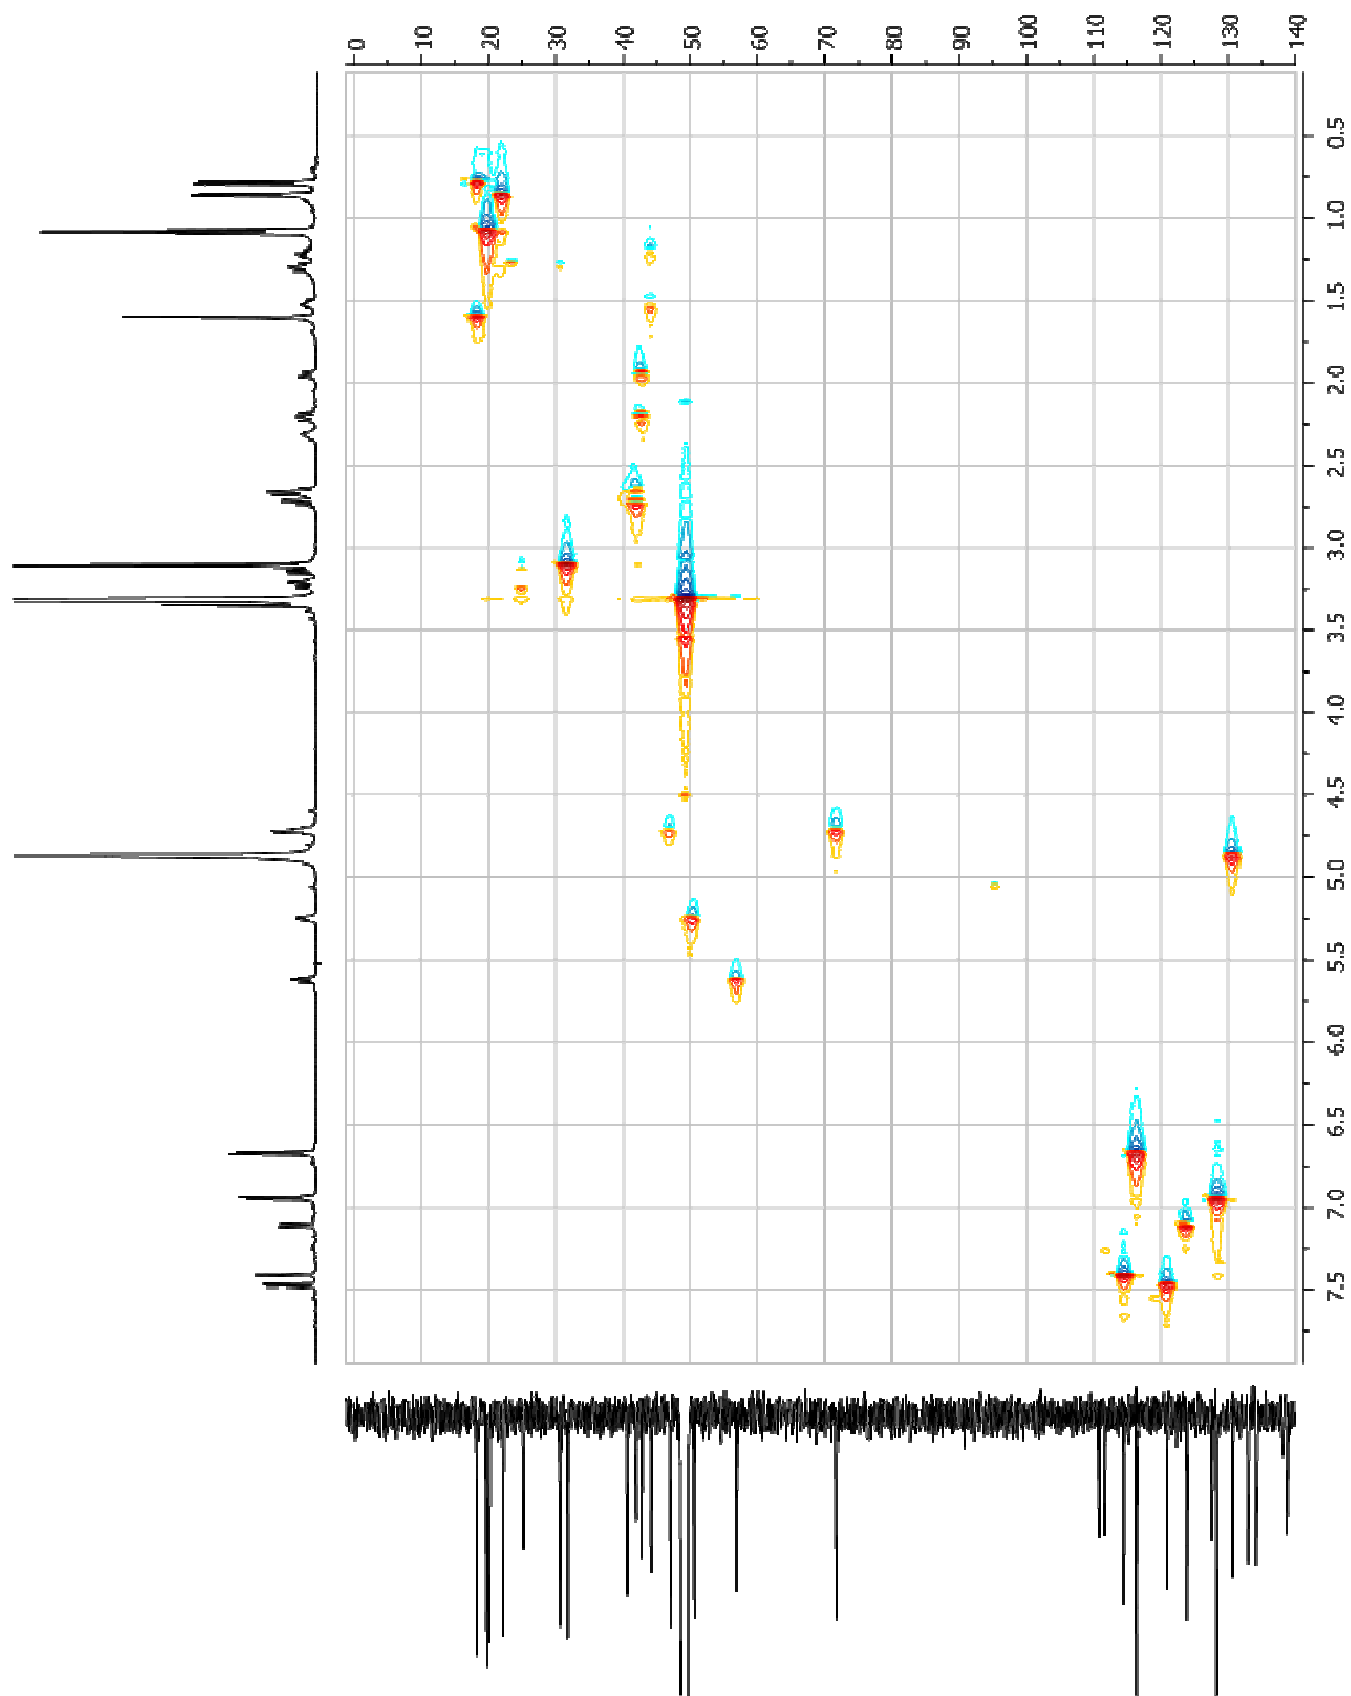

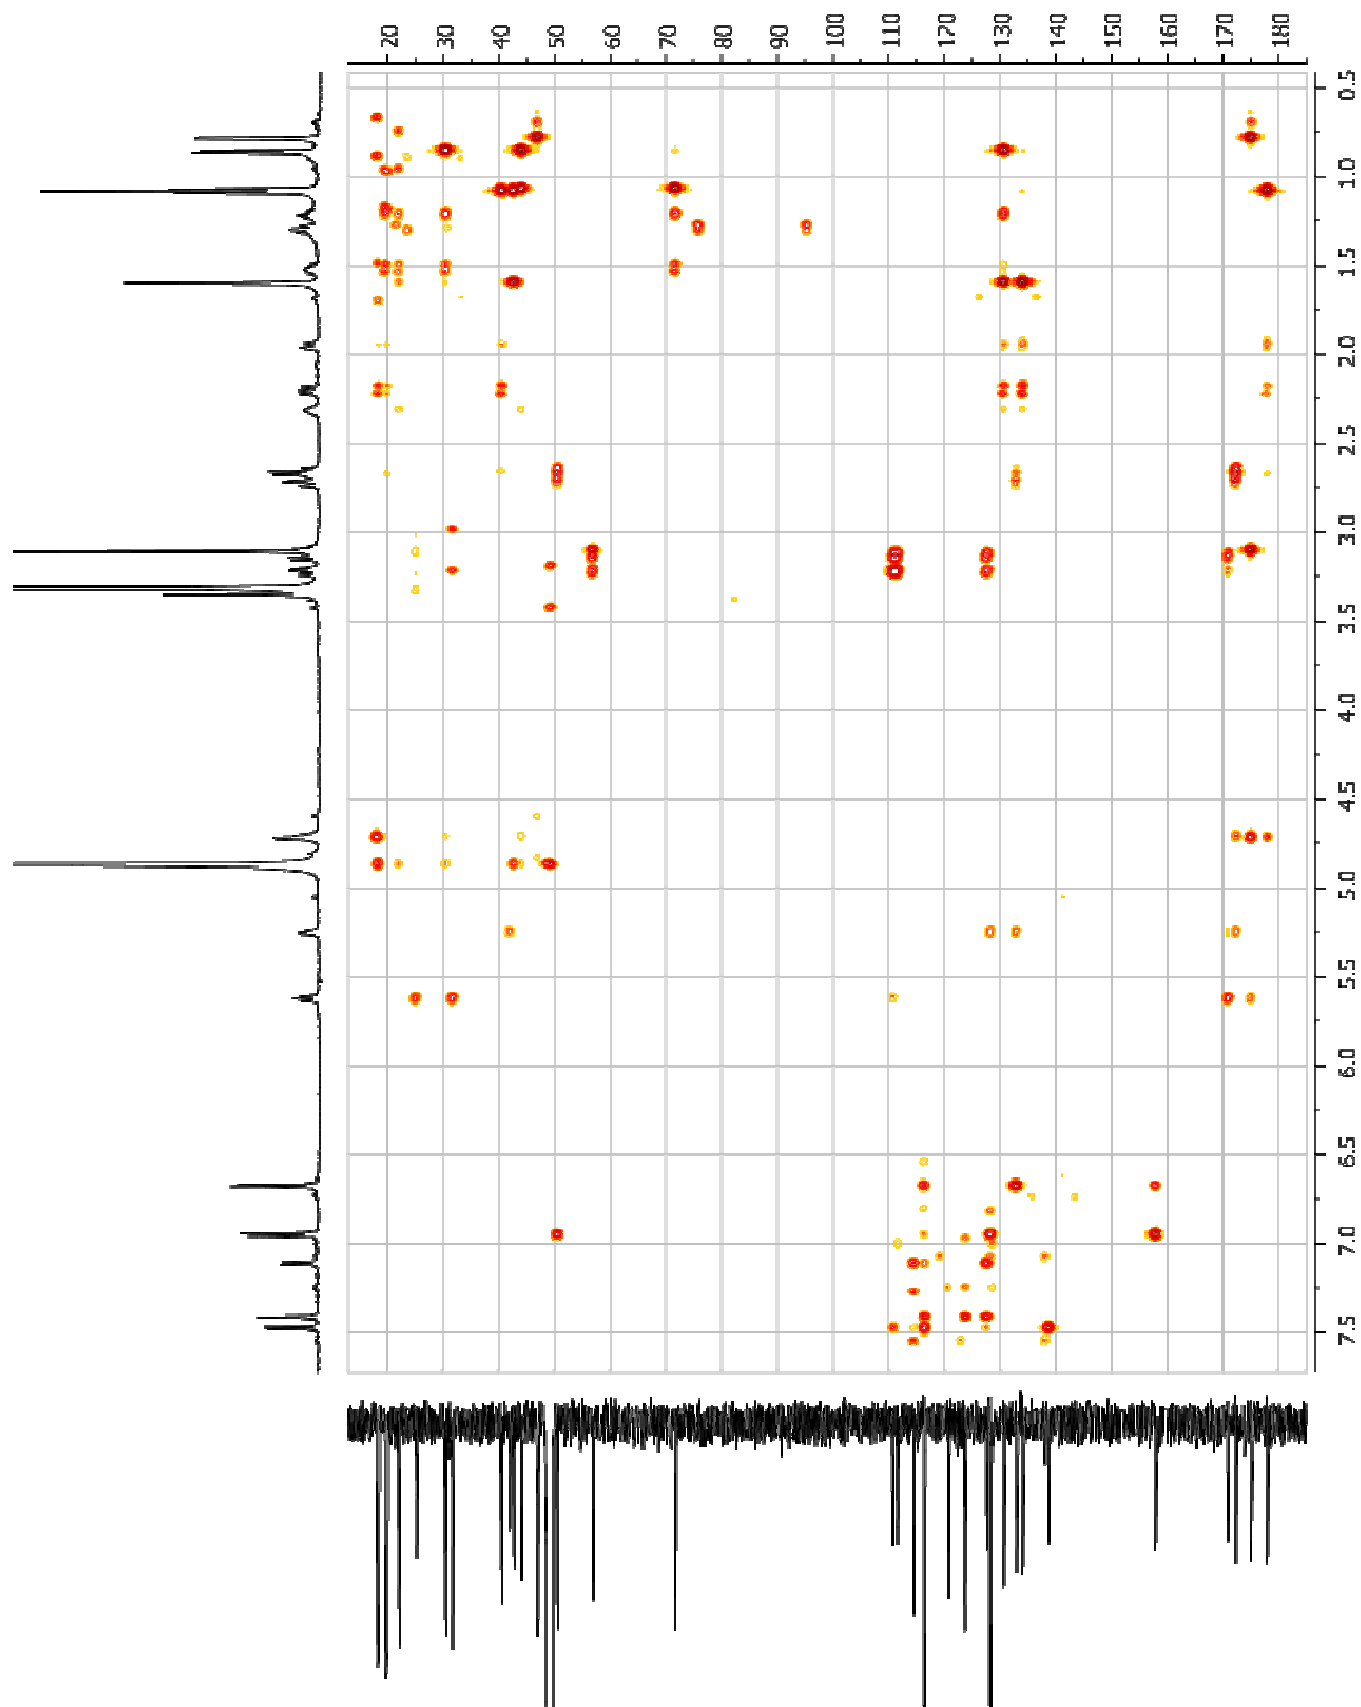

Figure S6.  $^1\text{H}$ ,  $^{13}\text{C}$ , gHMQC, and gHMBC spectra for **9** in  $\text{CD}_3\text{OD}$ .

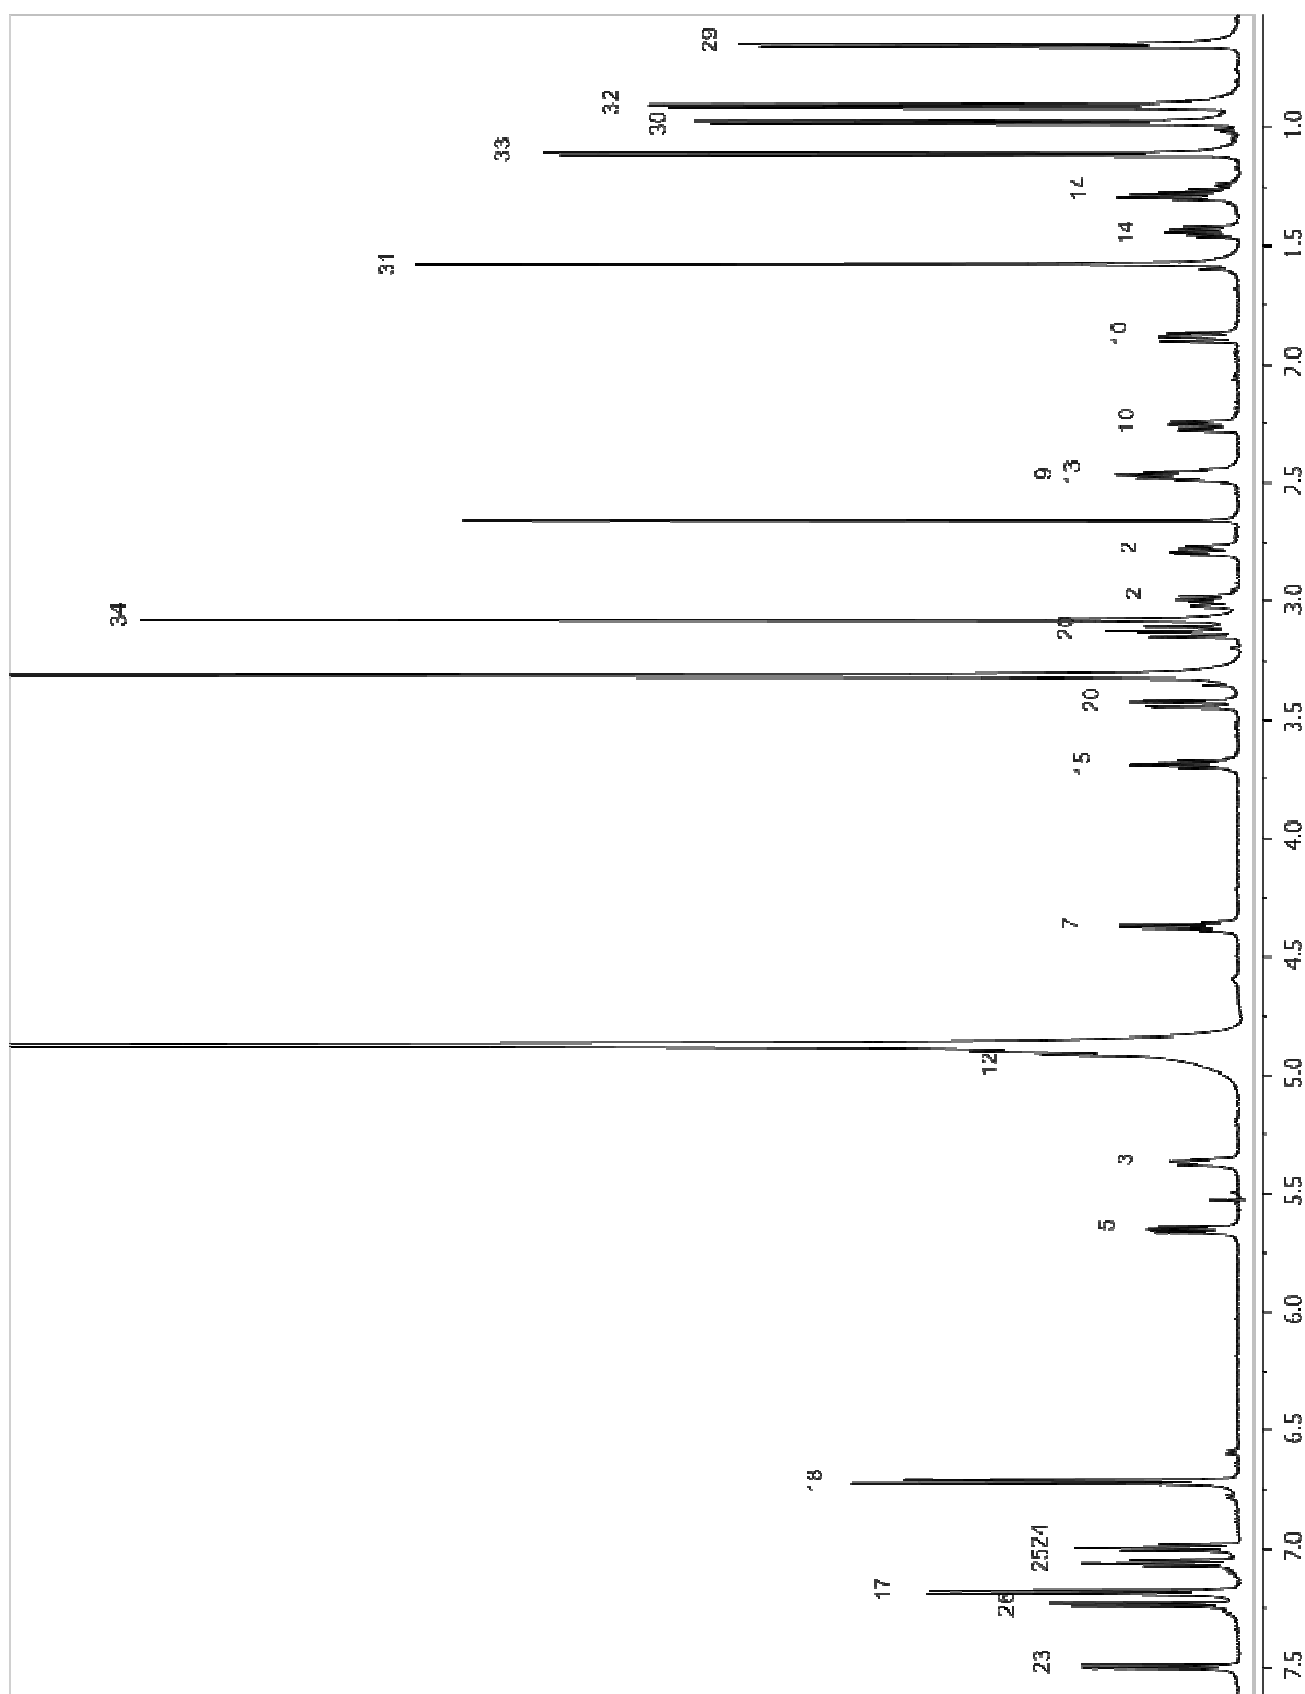

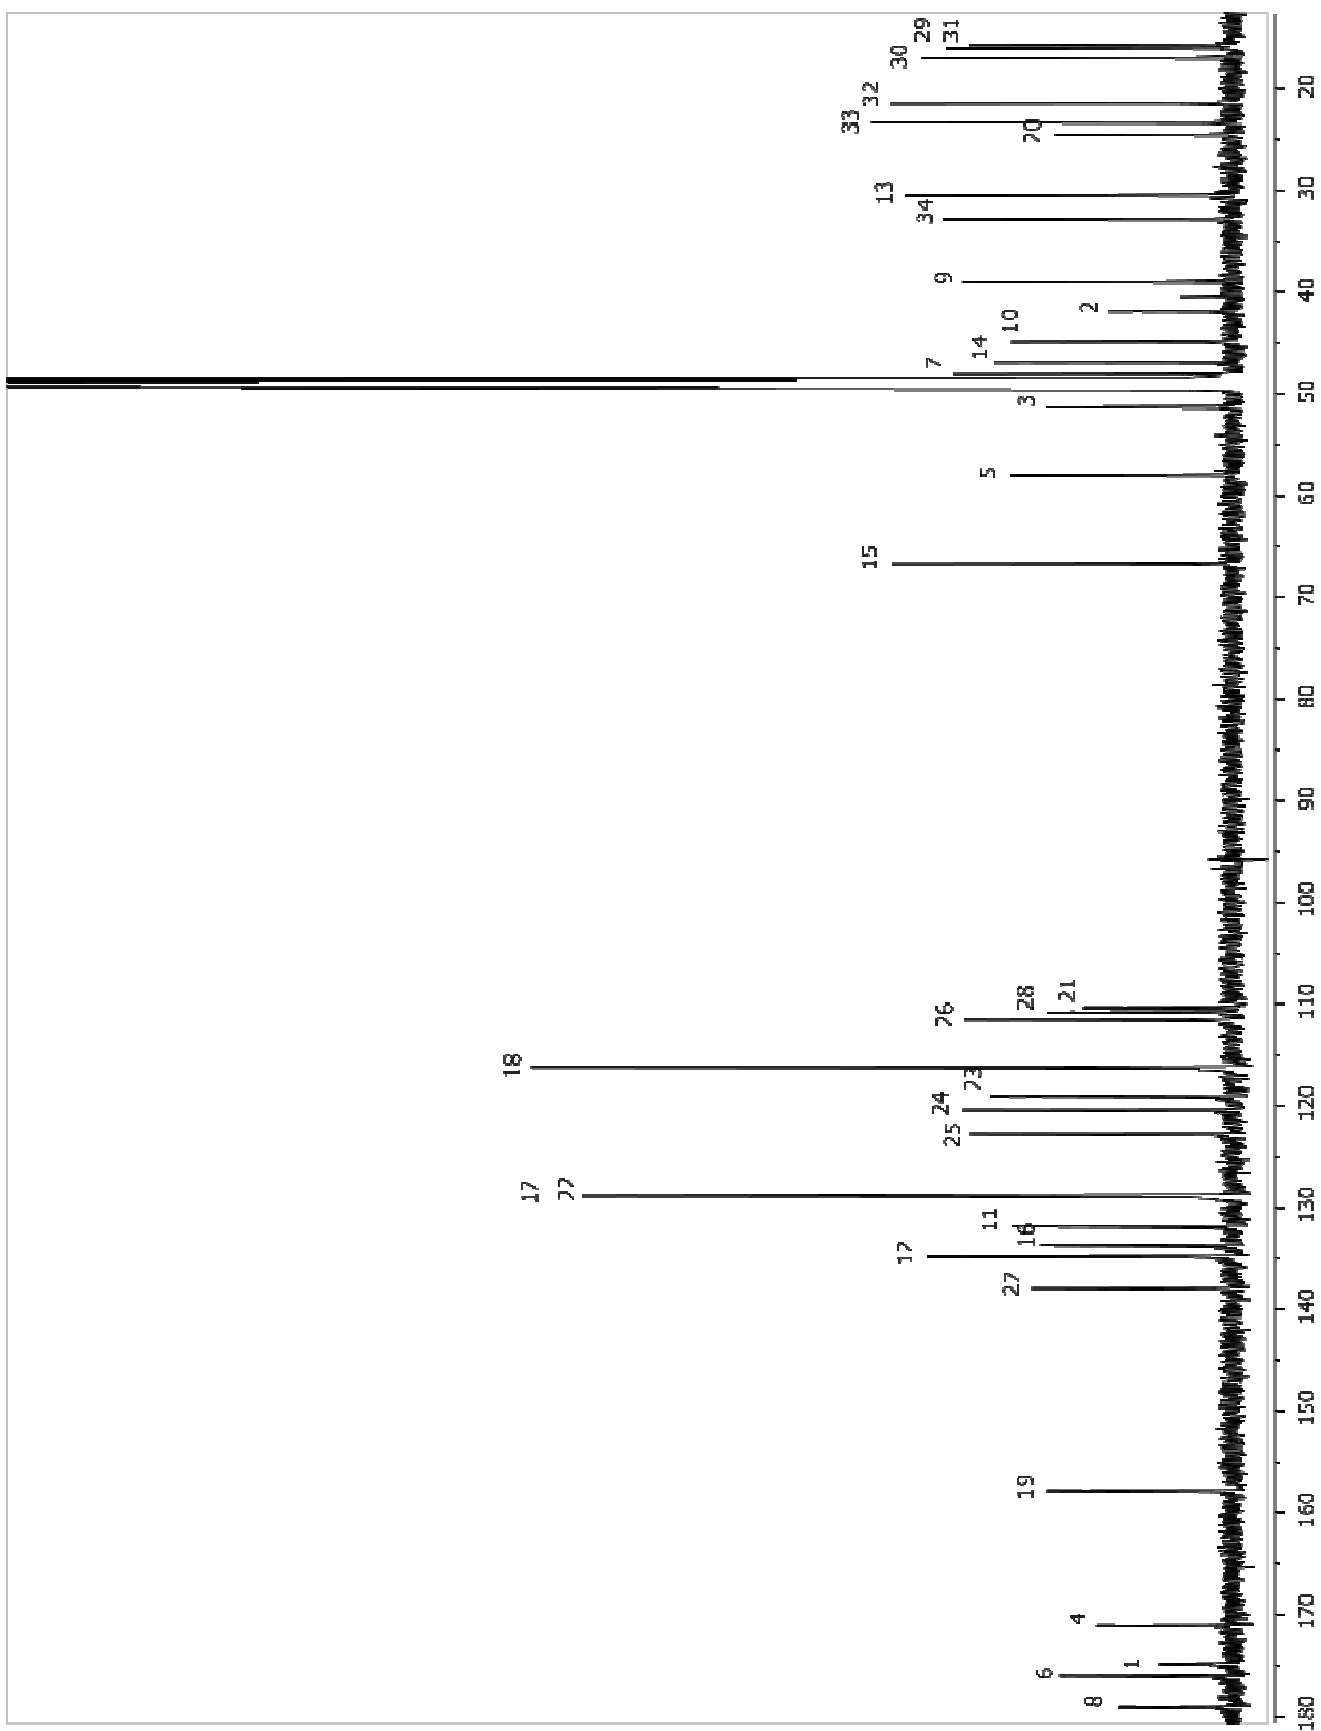

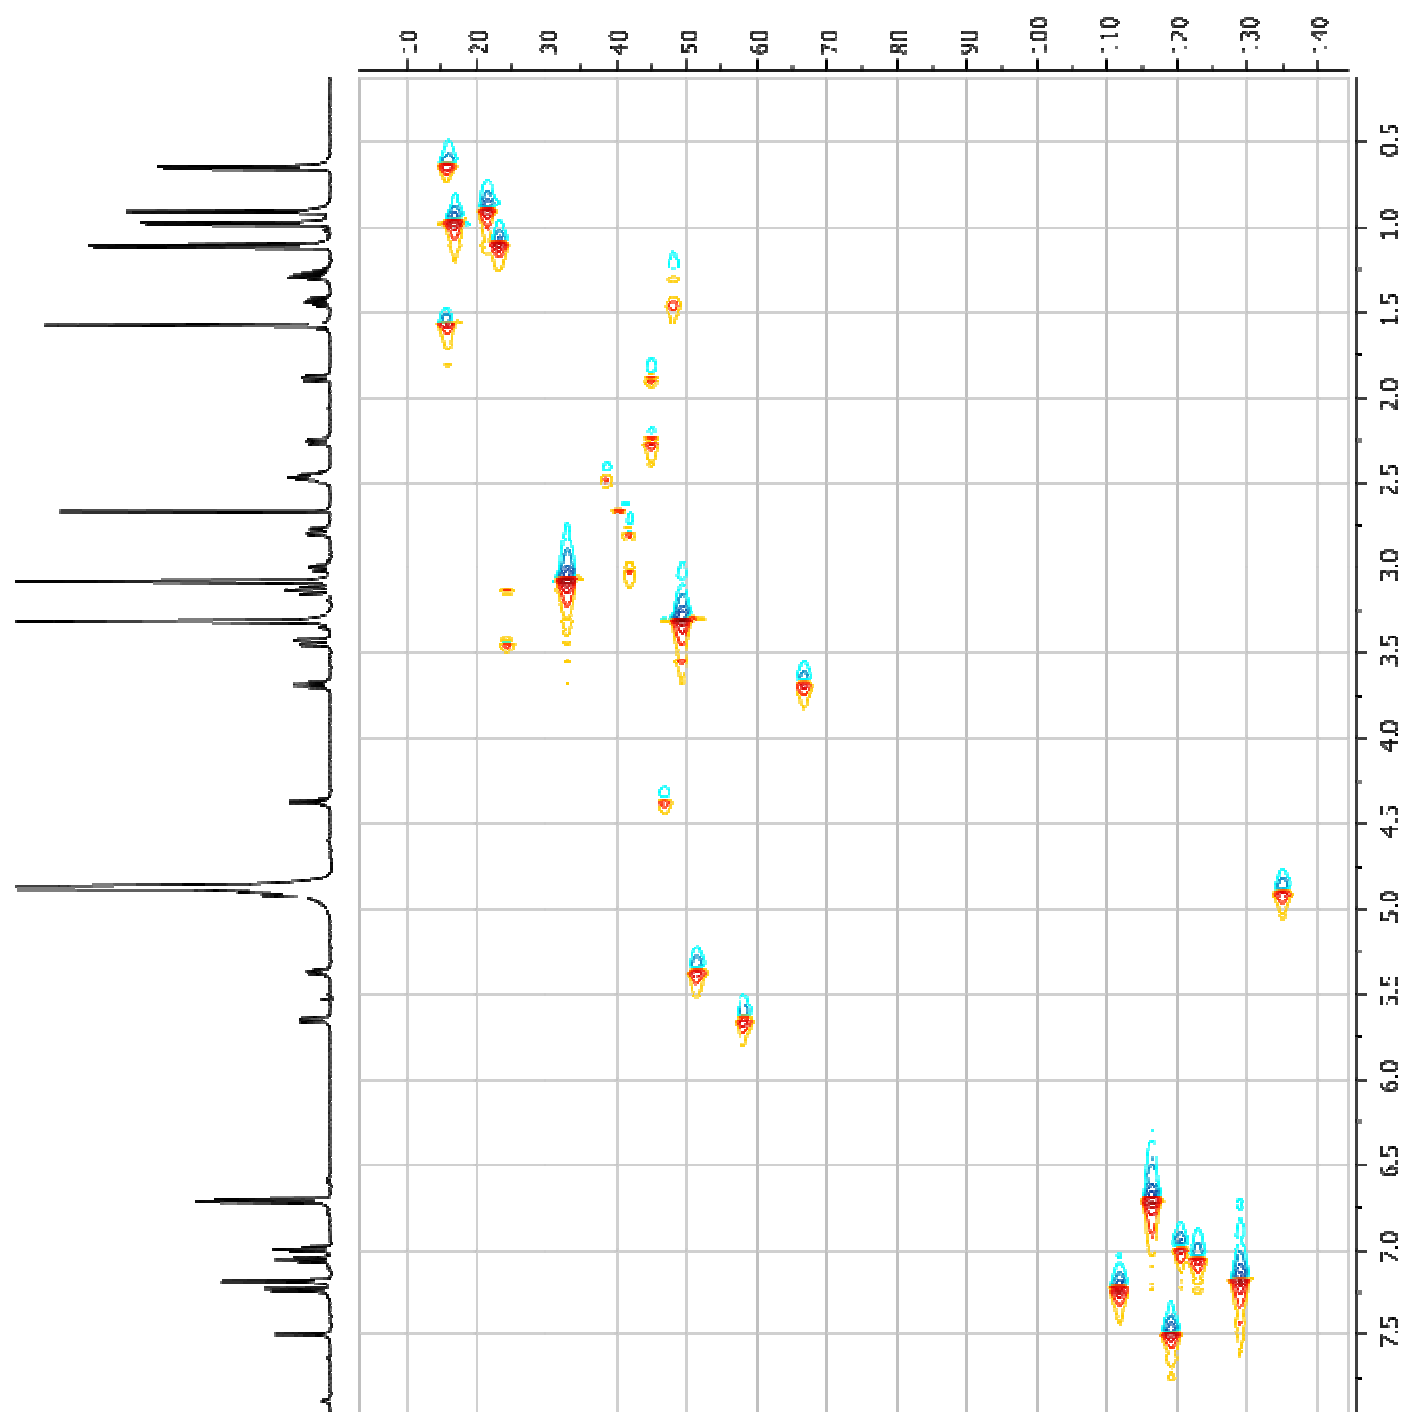

S16



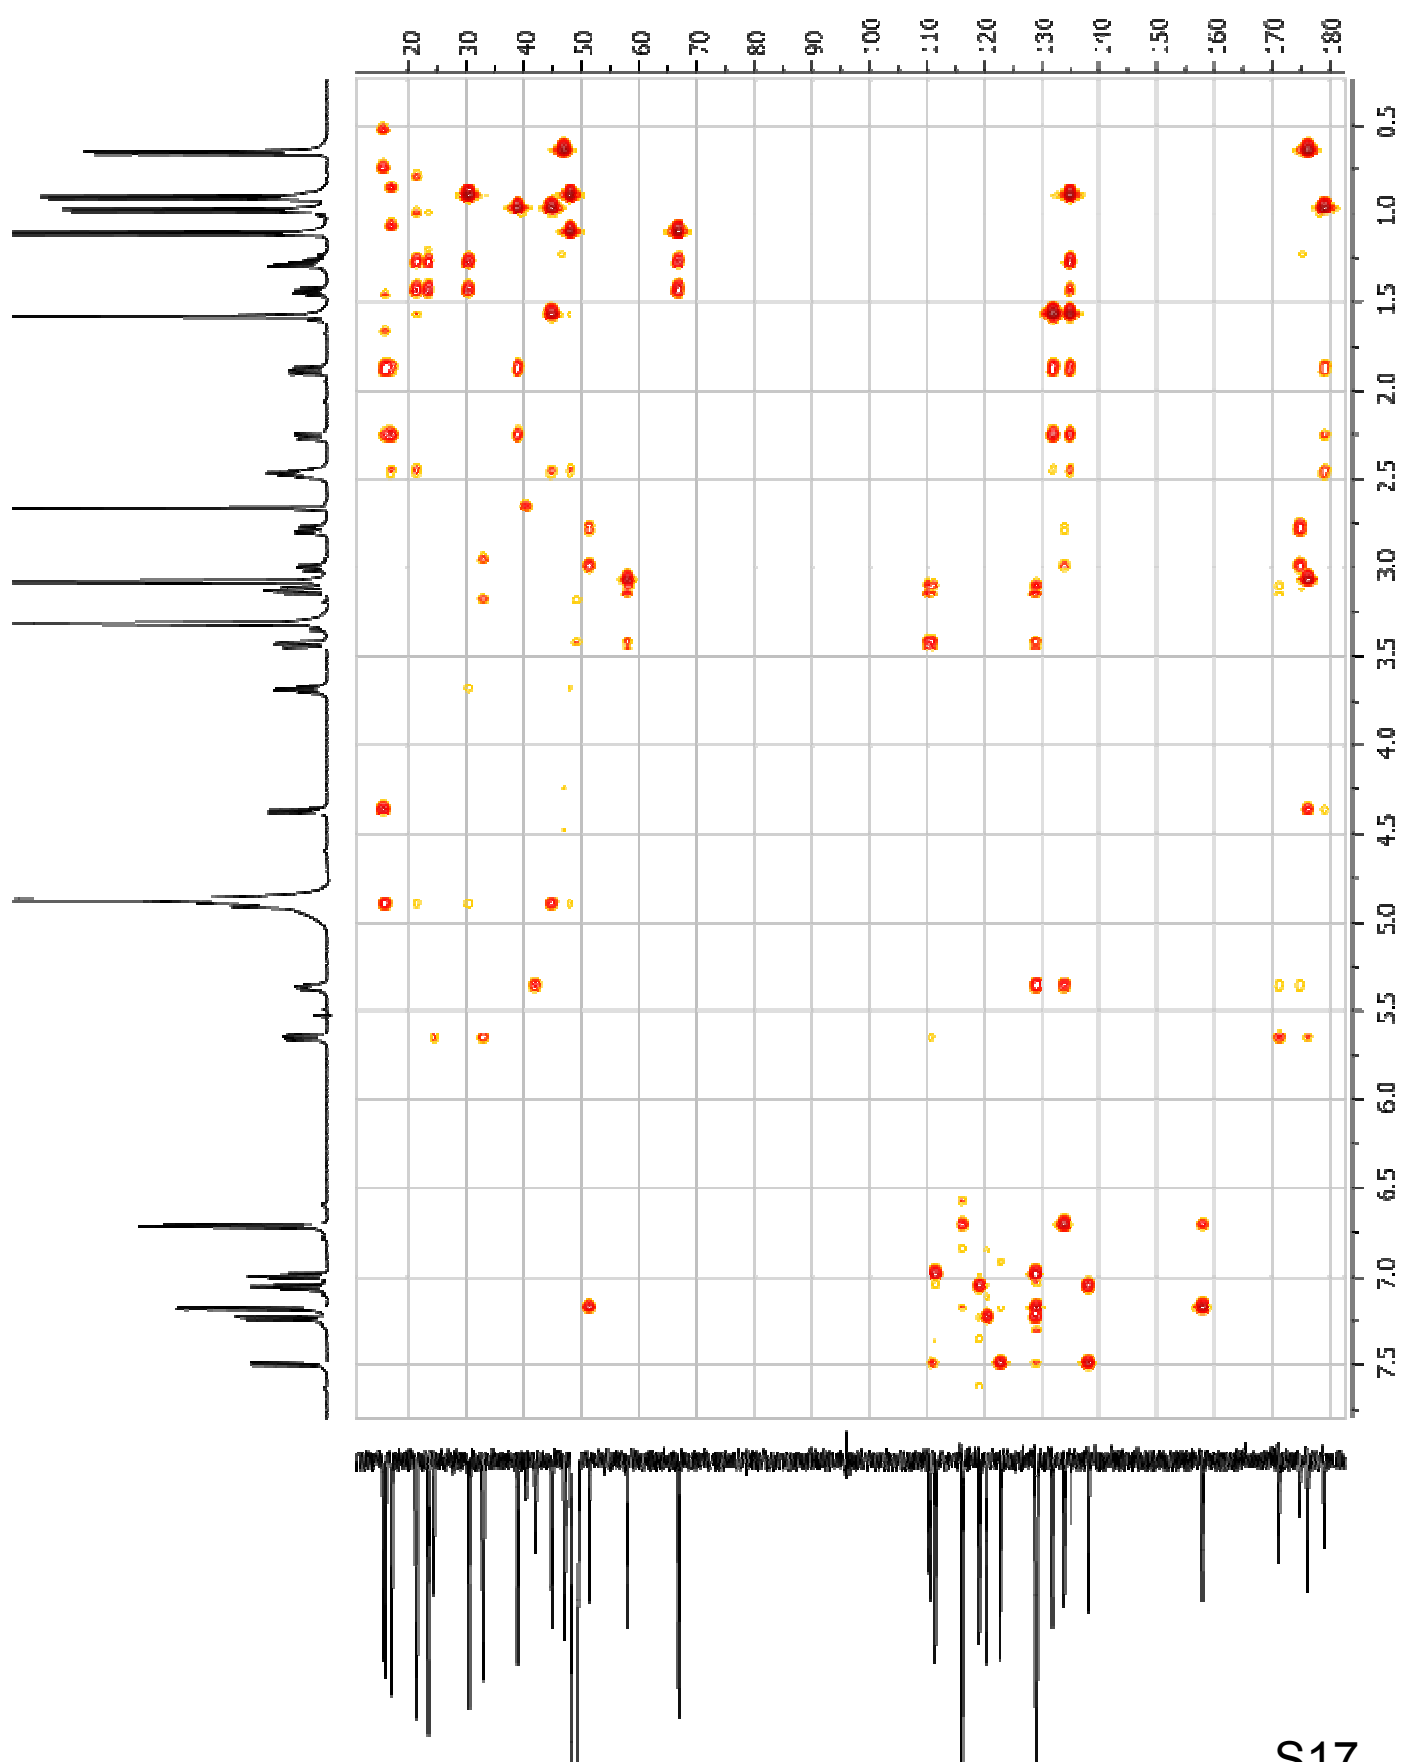

Figure S7.  $^1\text{H}$ ,  $^{13}\text{C}$ , gHMQC, and gHMBC spectra for **10** in  $\text{CD}_3\text{OD}$ .

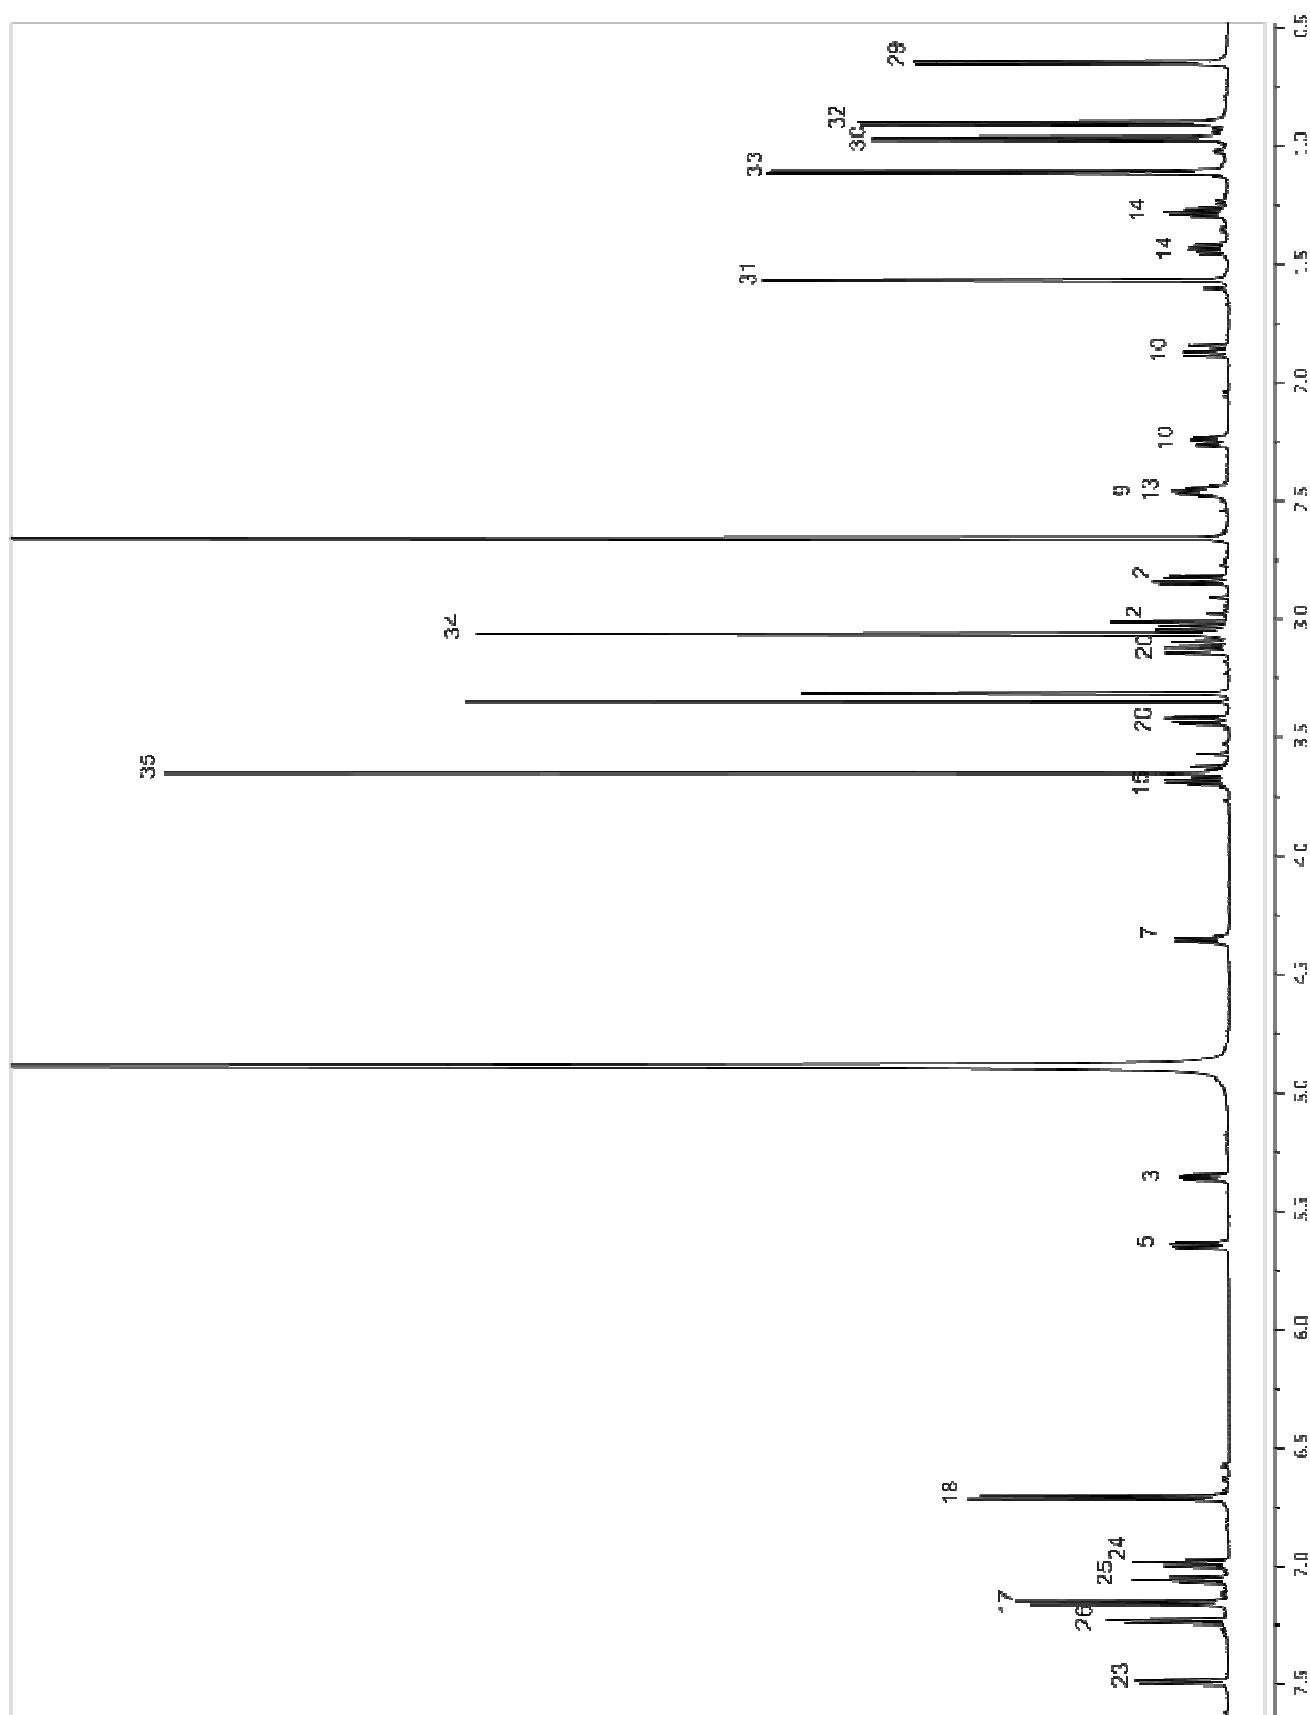

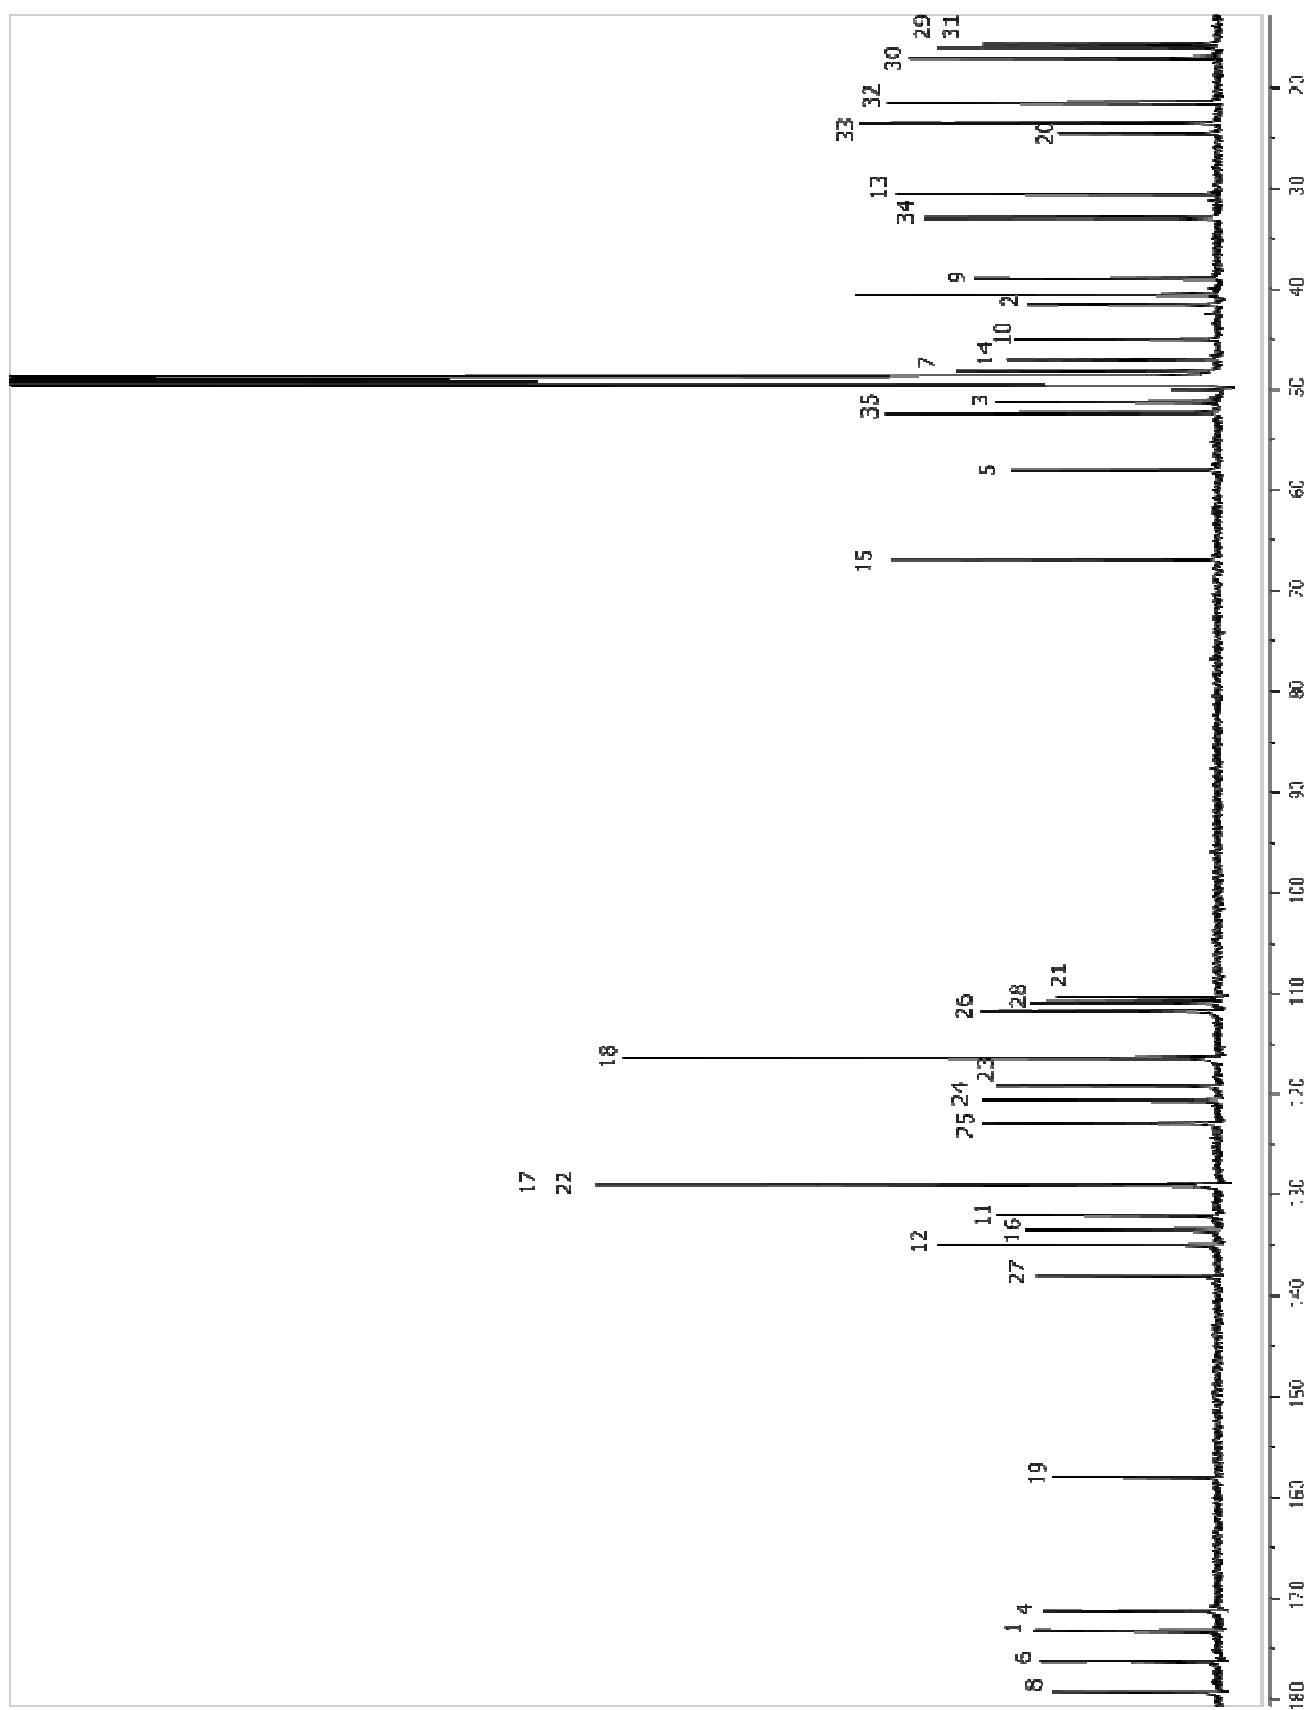

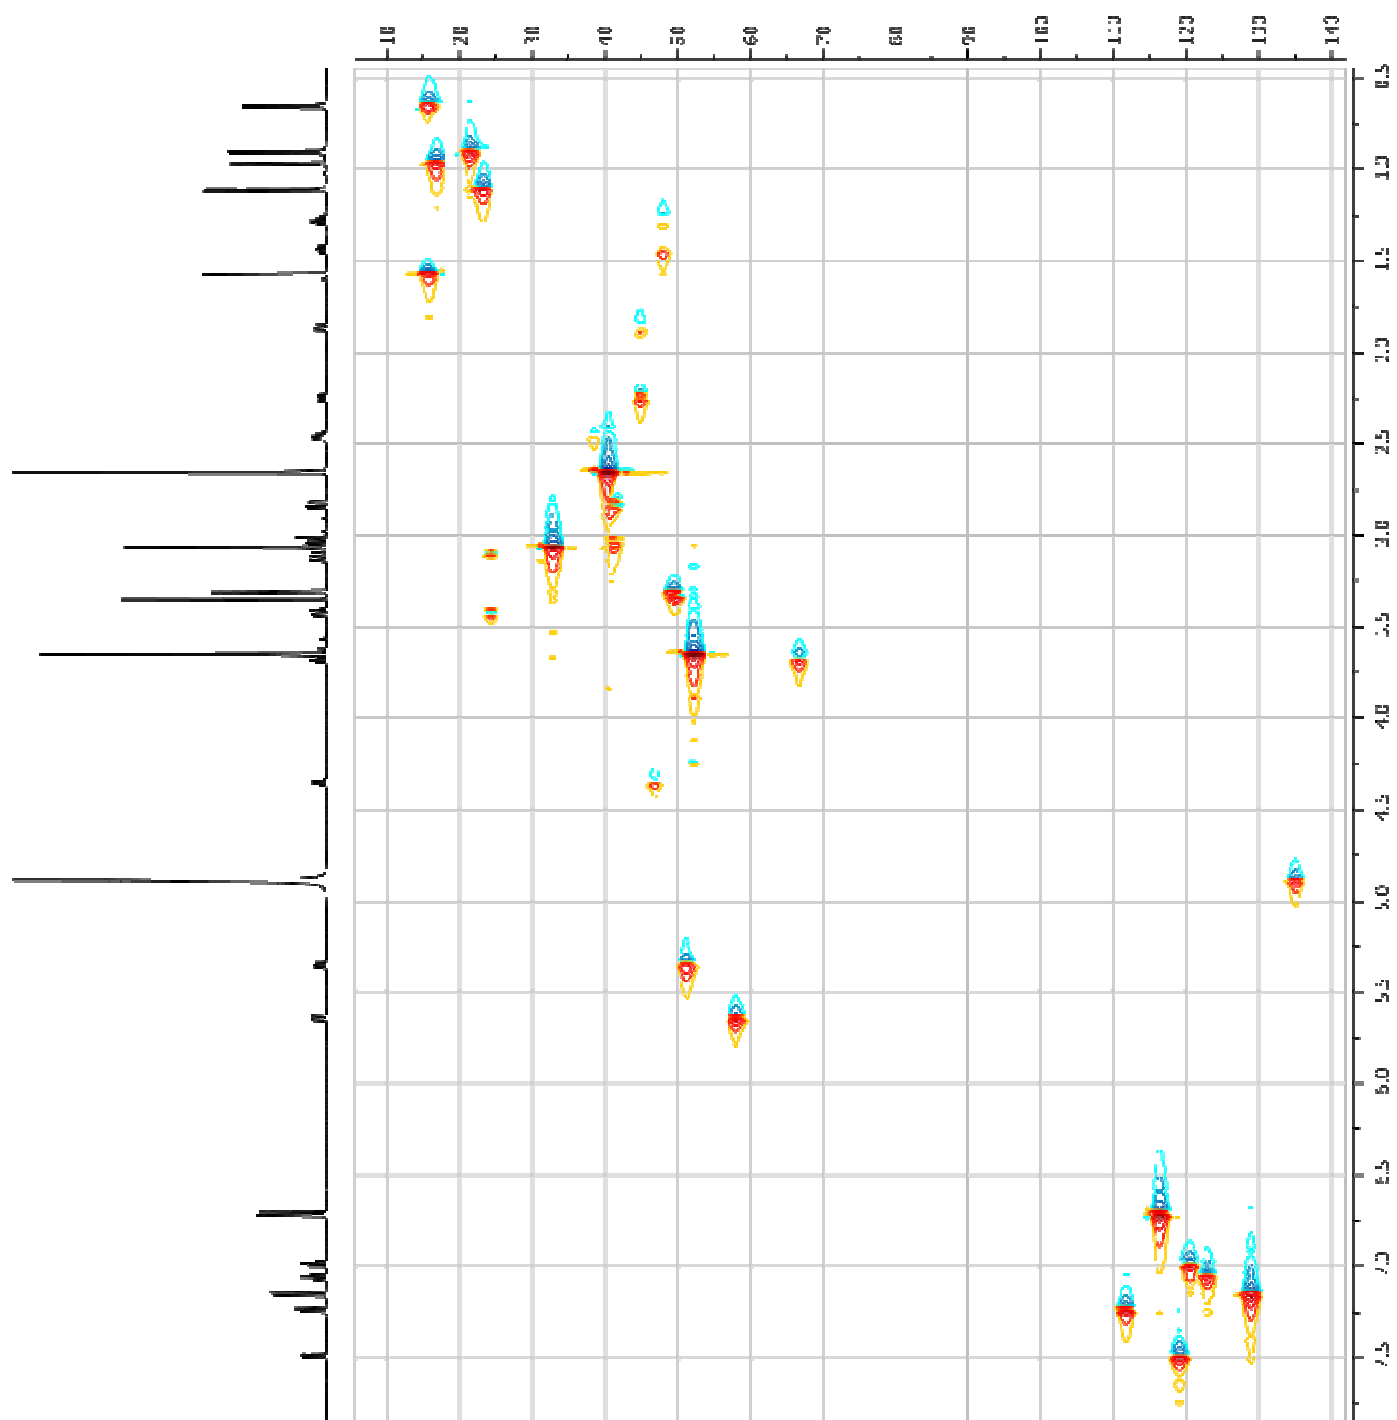

S20

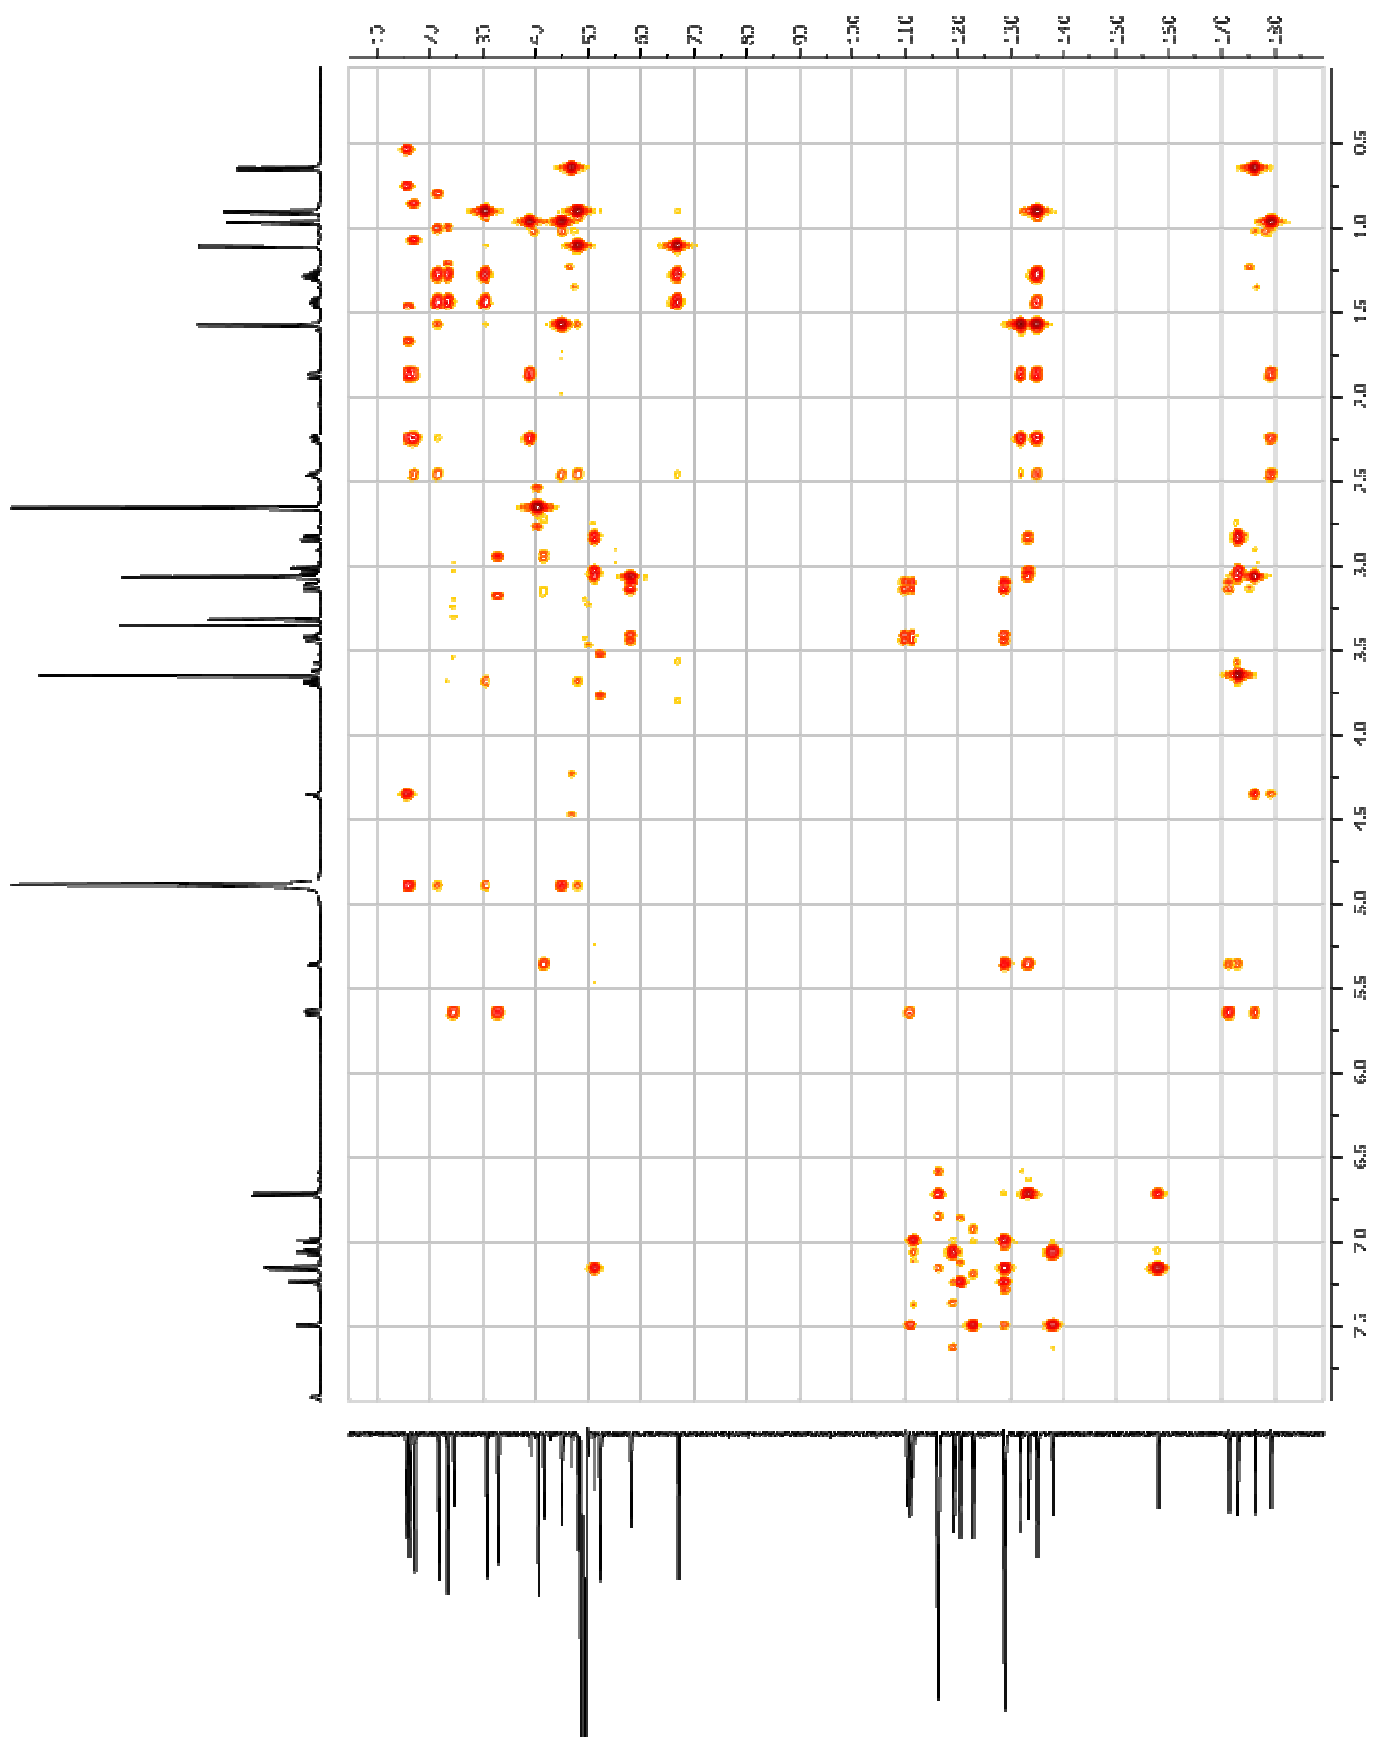

Figure S8.  $^1\text{H}$ ,  $^{13}\text{C}$ , gHMQC, and gHMBC spectra for **11** in  $\text{CD}_3\text{OD}$ .

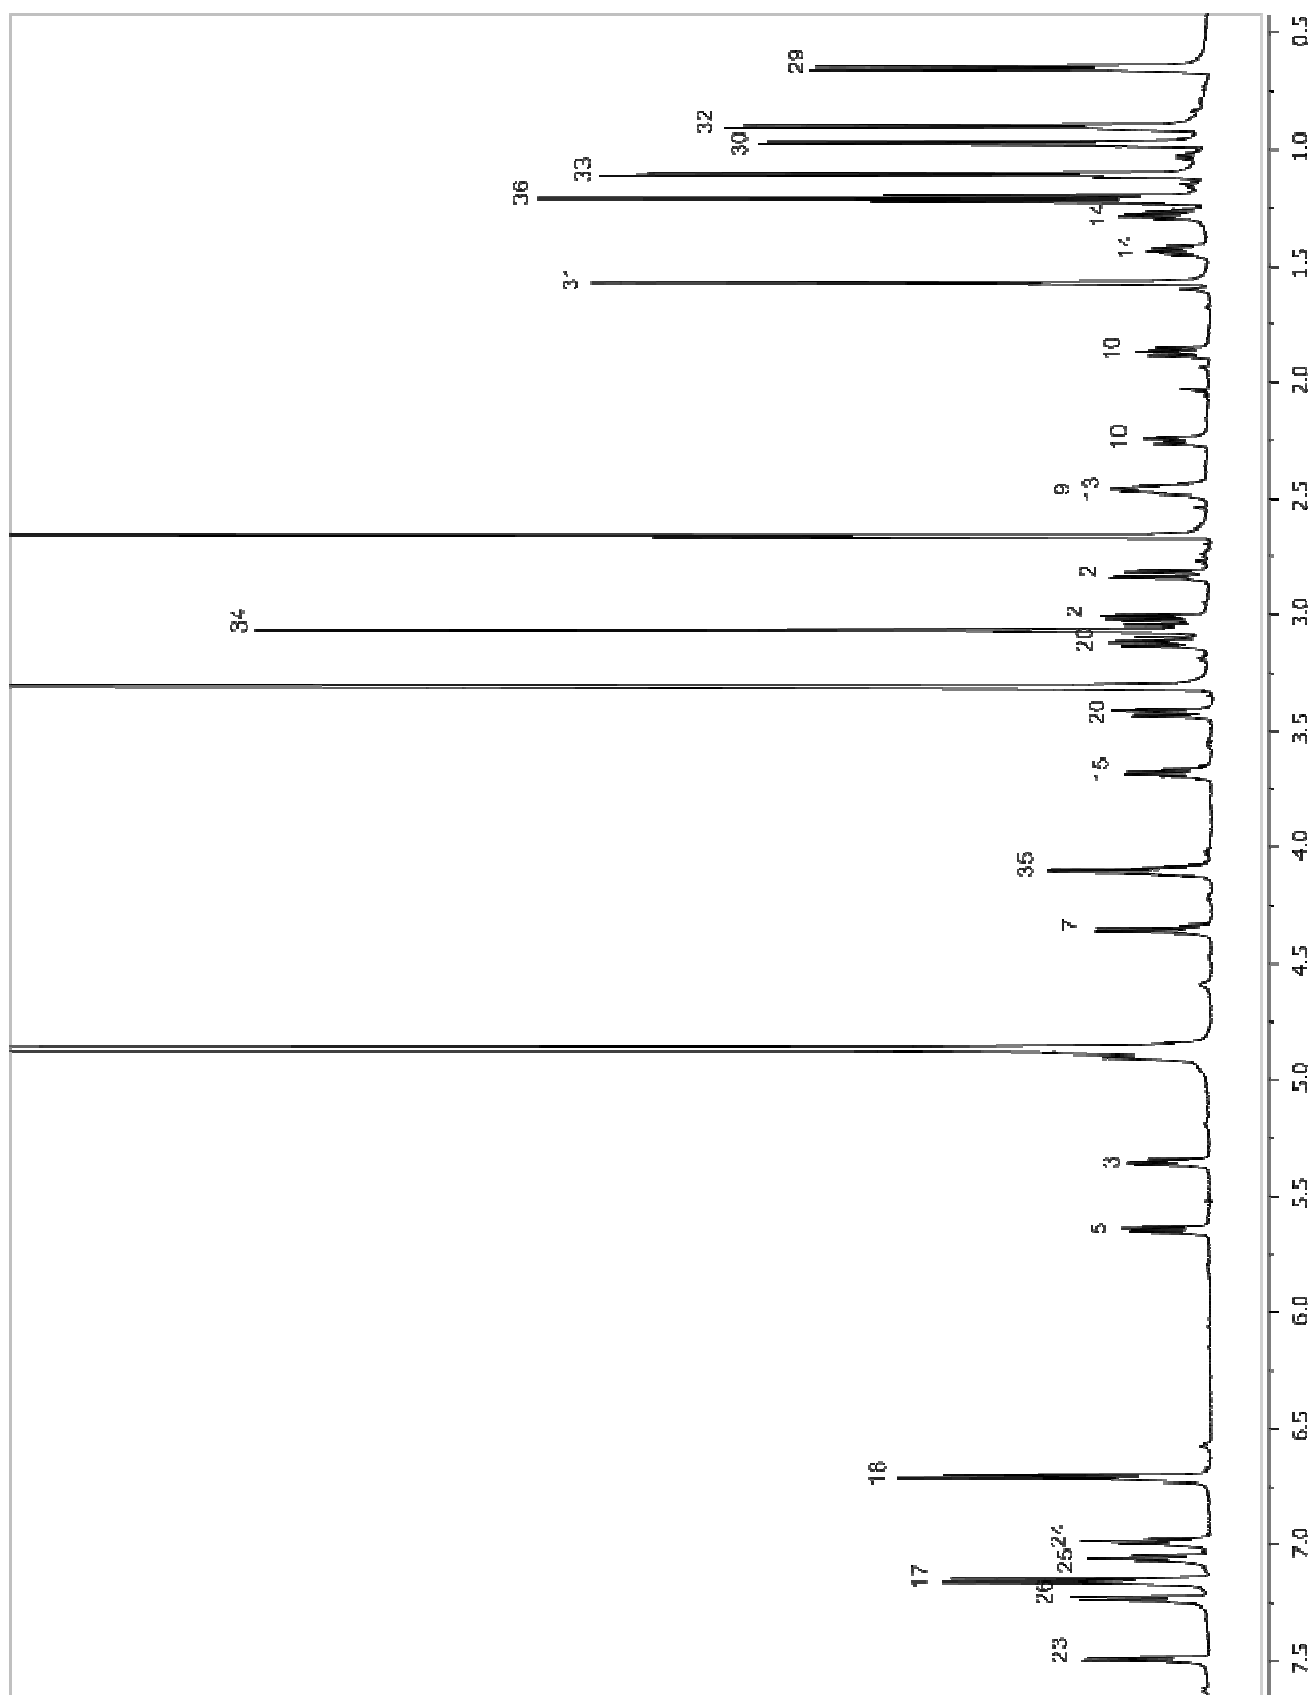

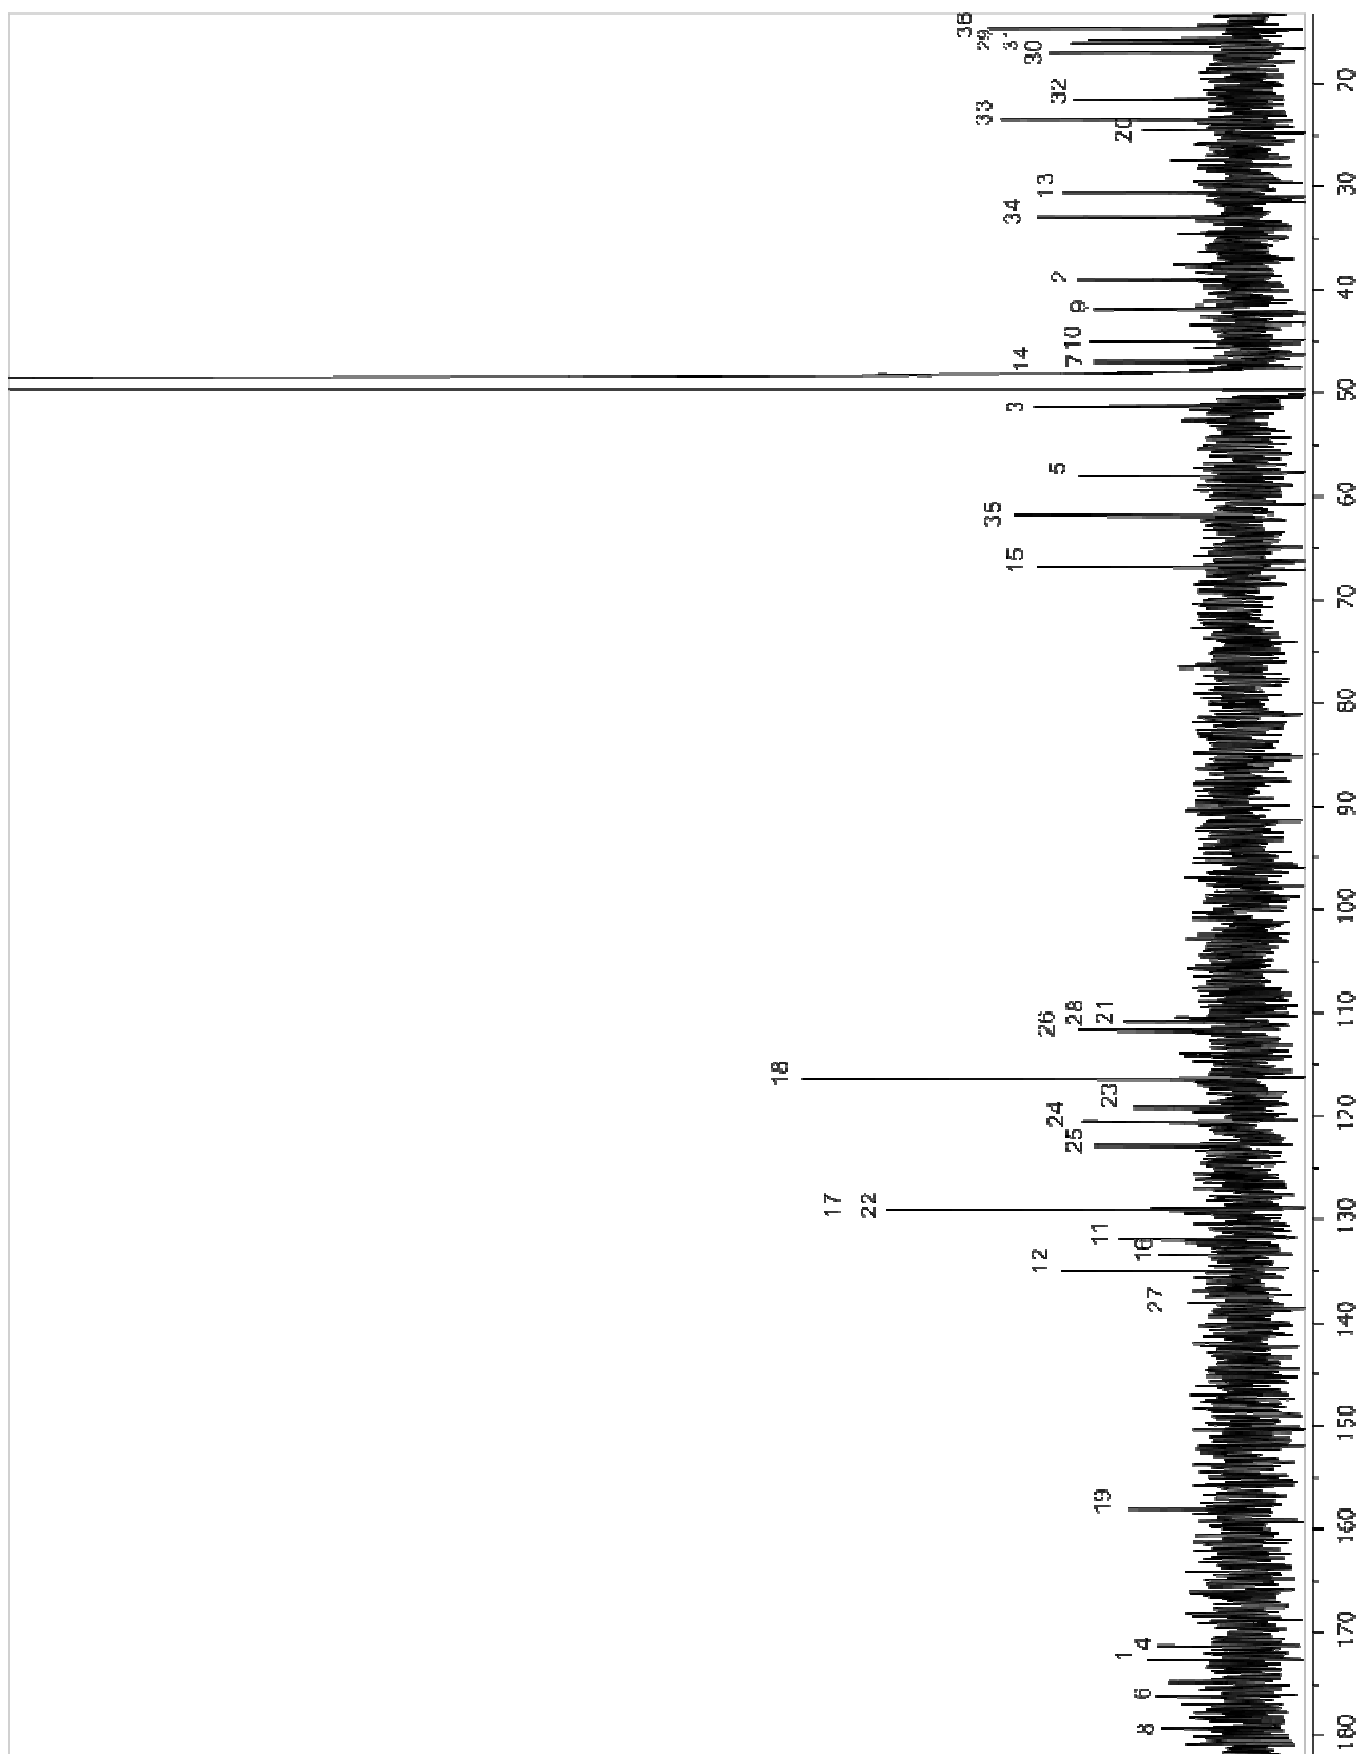

S23

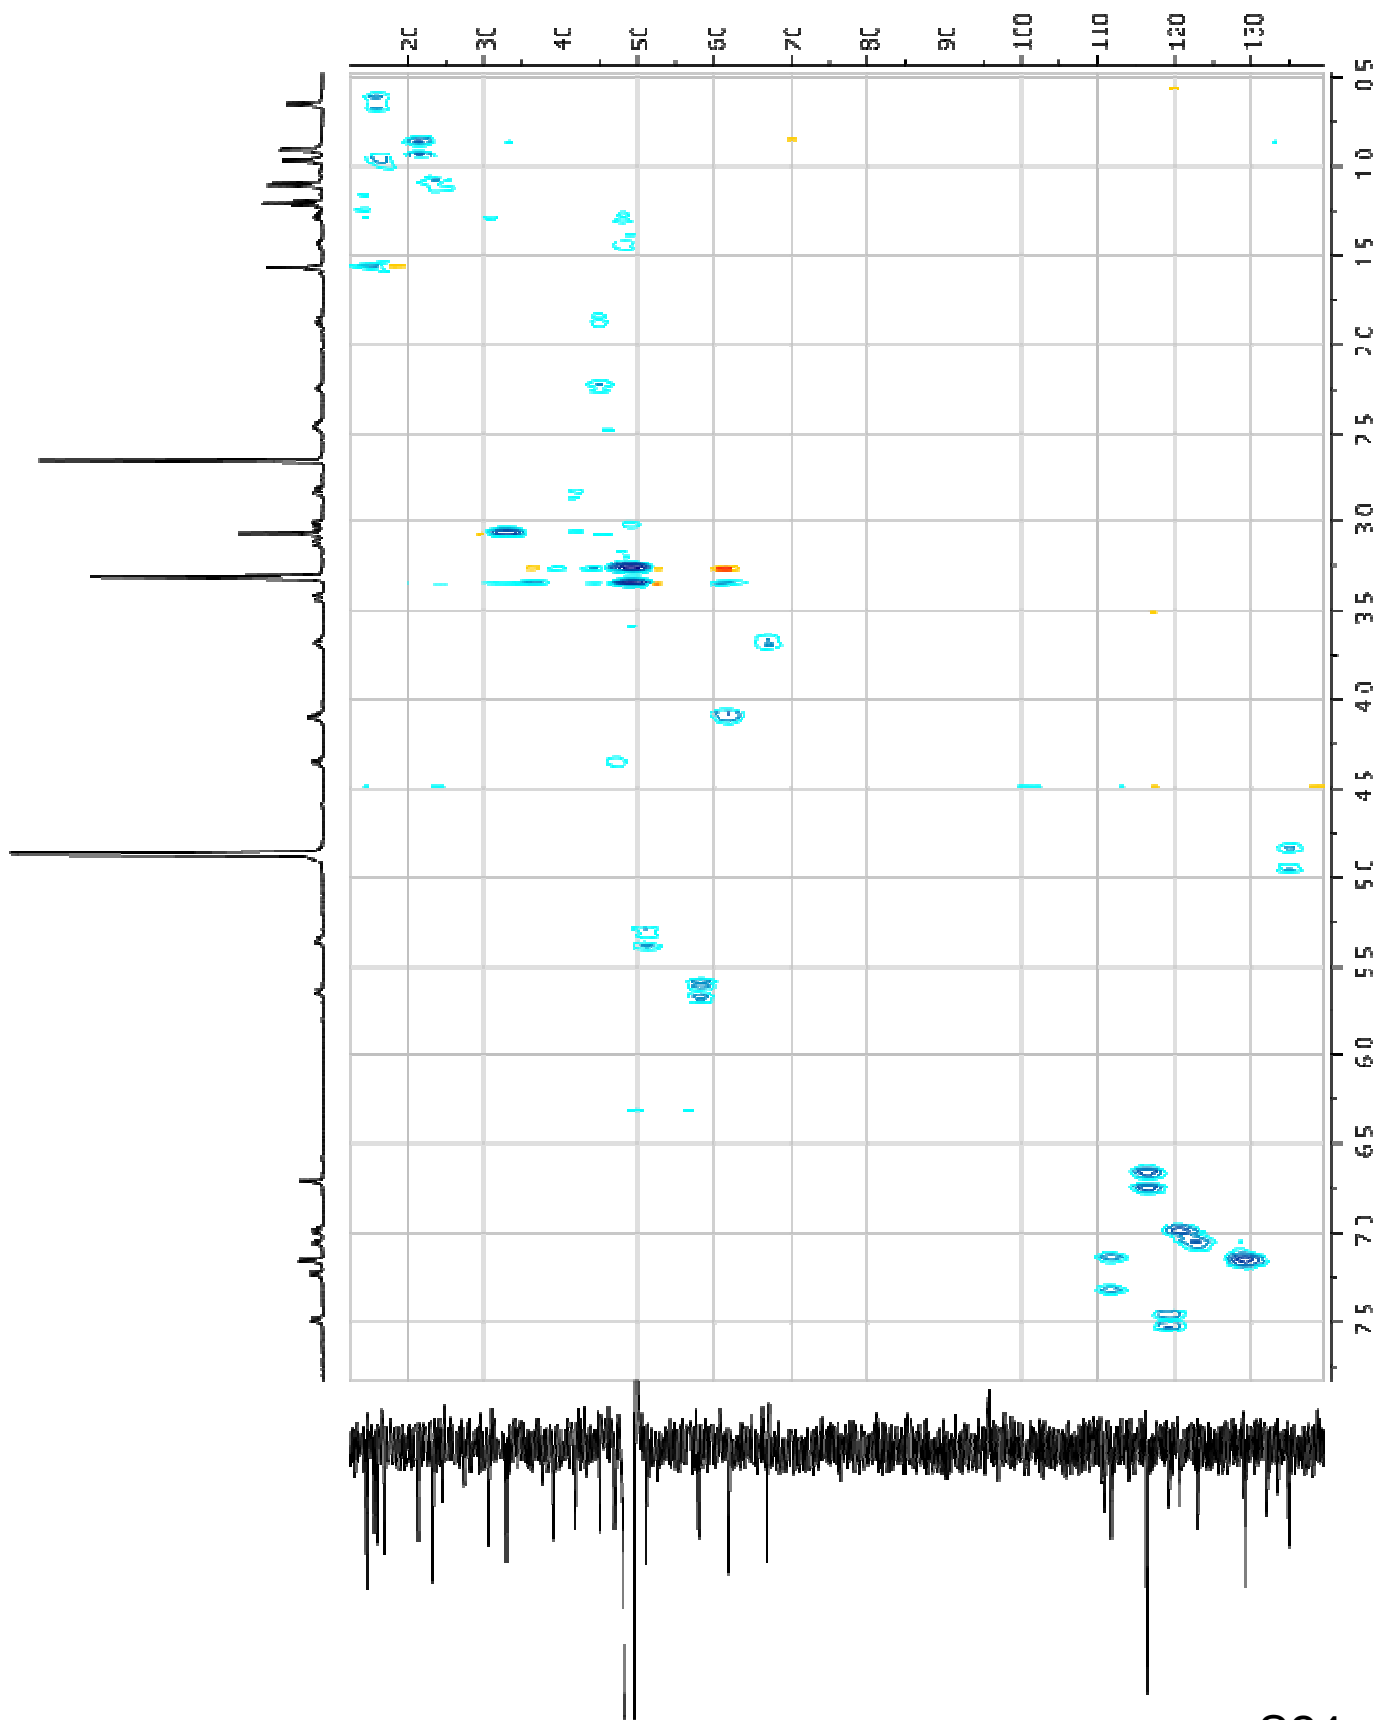



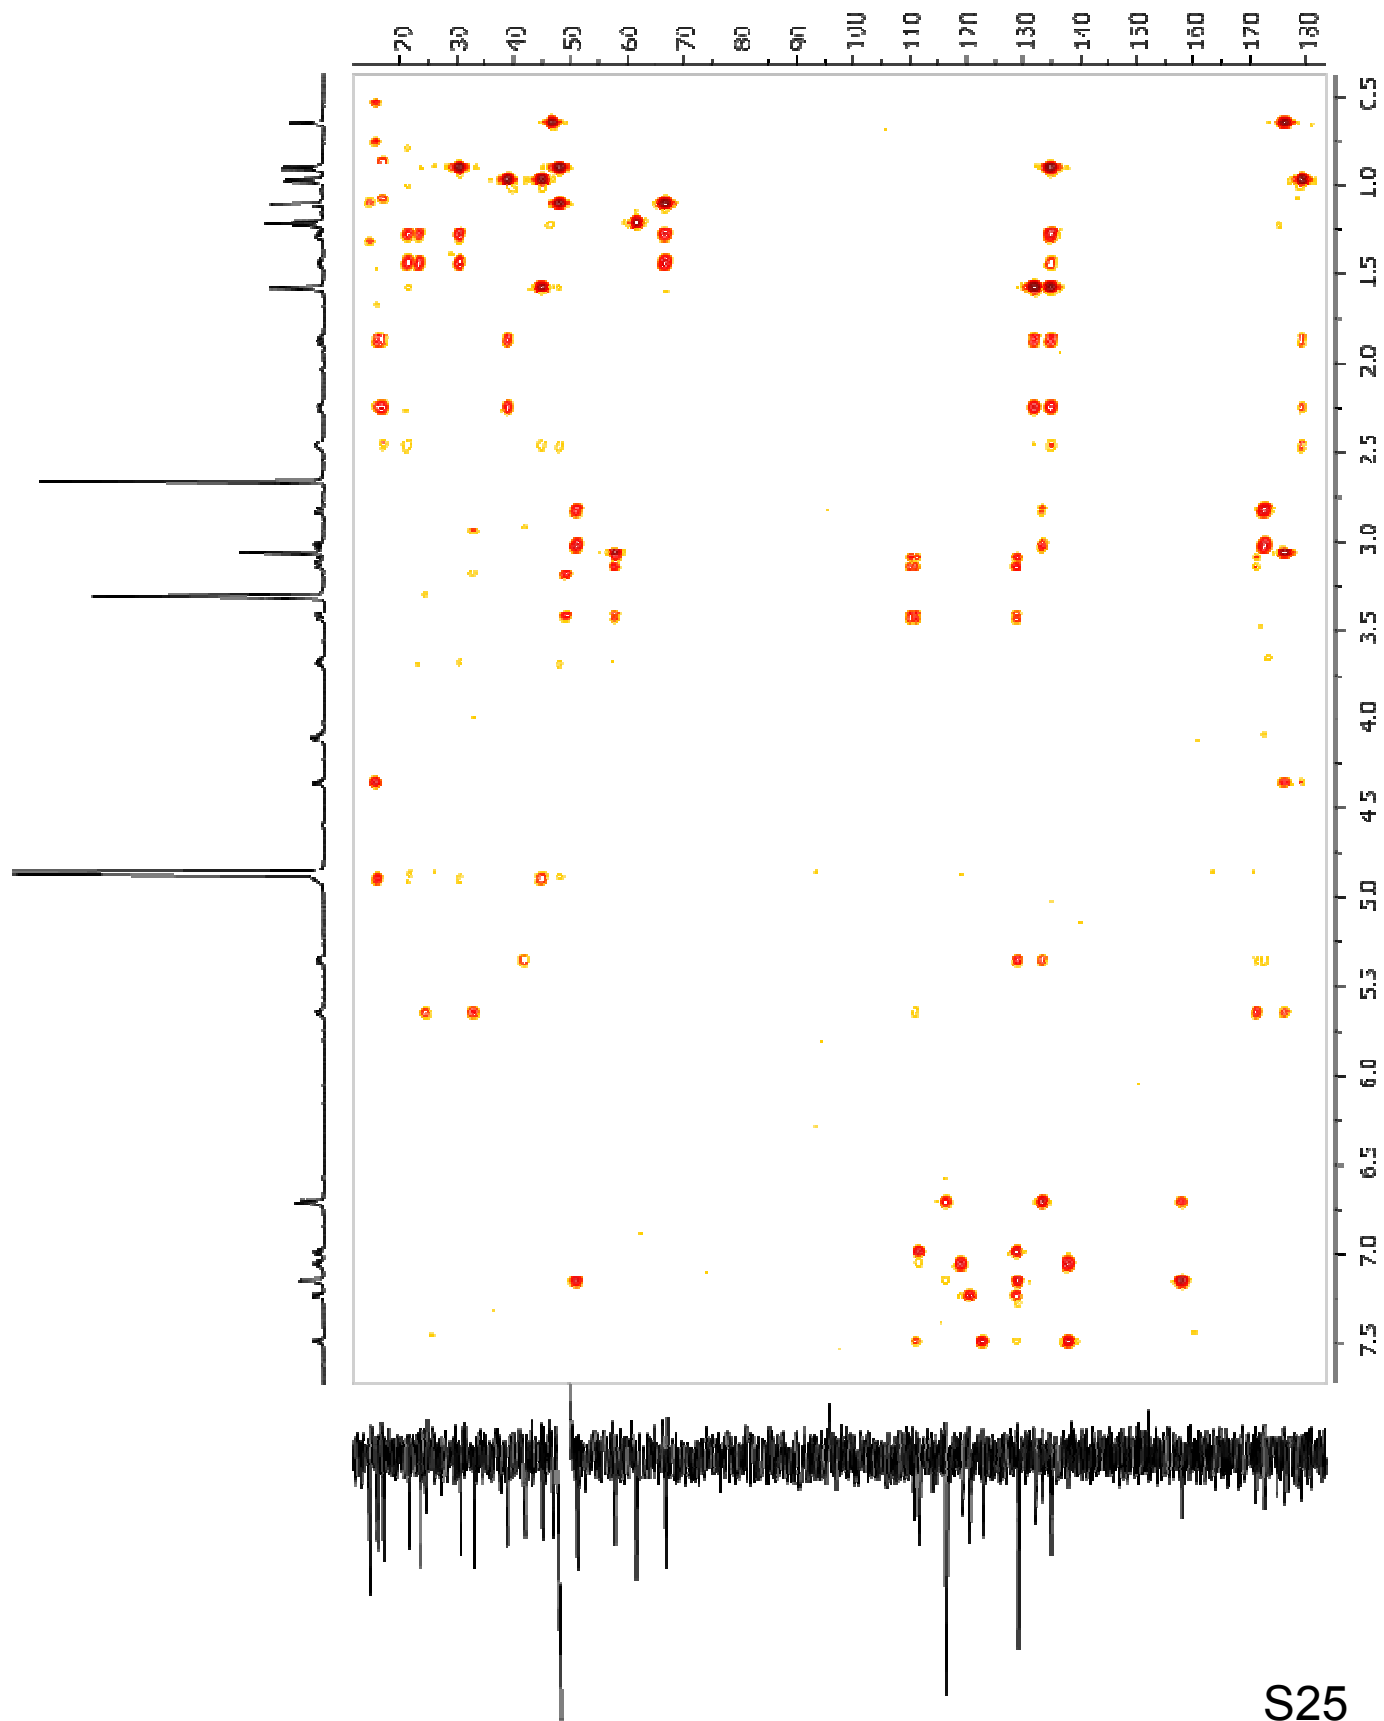

Figure S9.  $^1\text{H}$ ,  $^{13}\text{C}$ , gHMQC, and gHMBC spectra for **12** in  $\text{CD}_3\text{OD}$ .

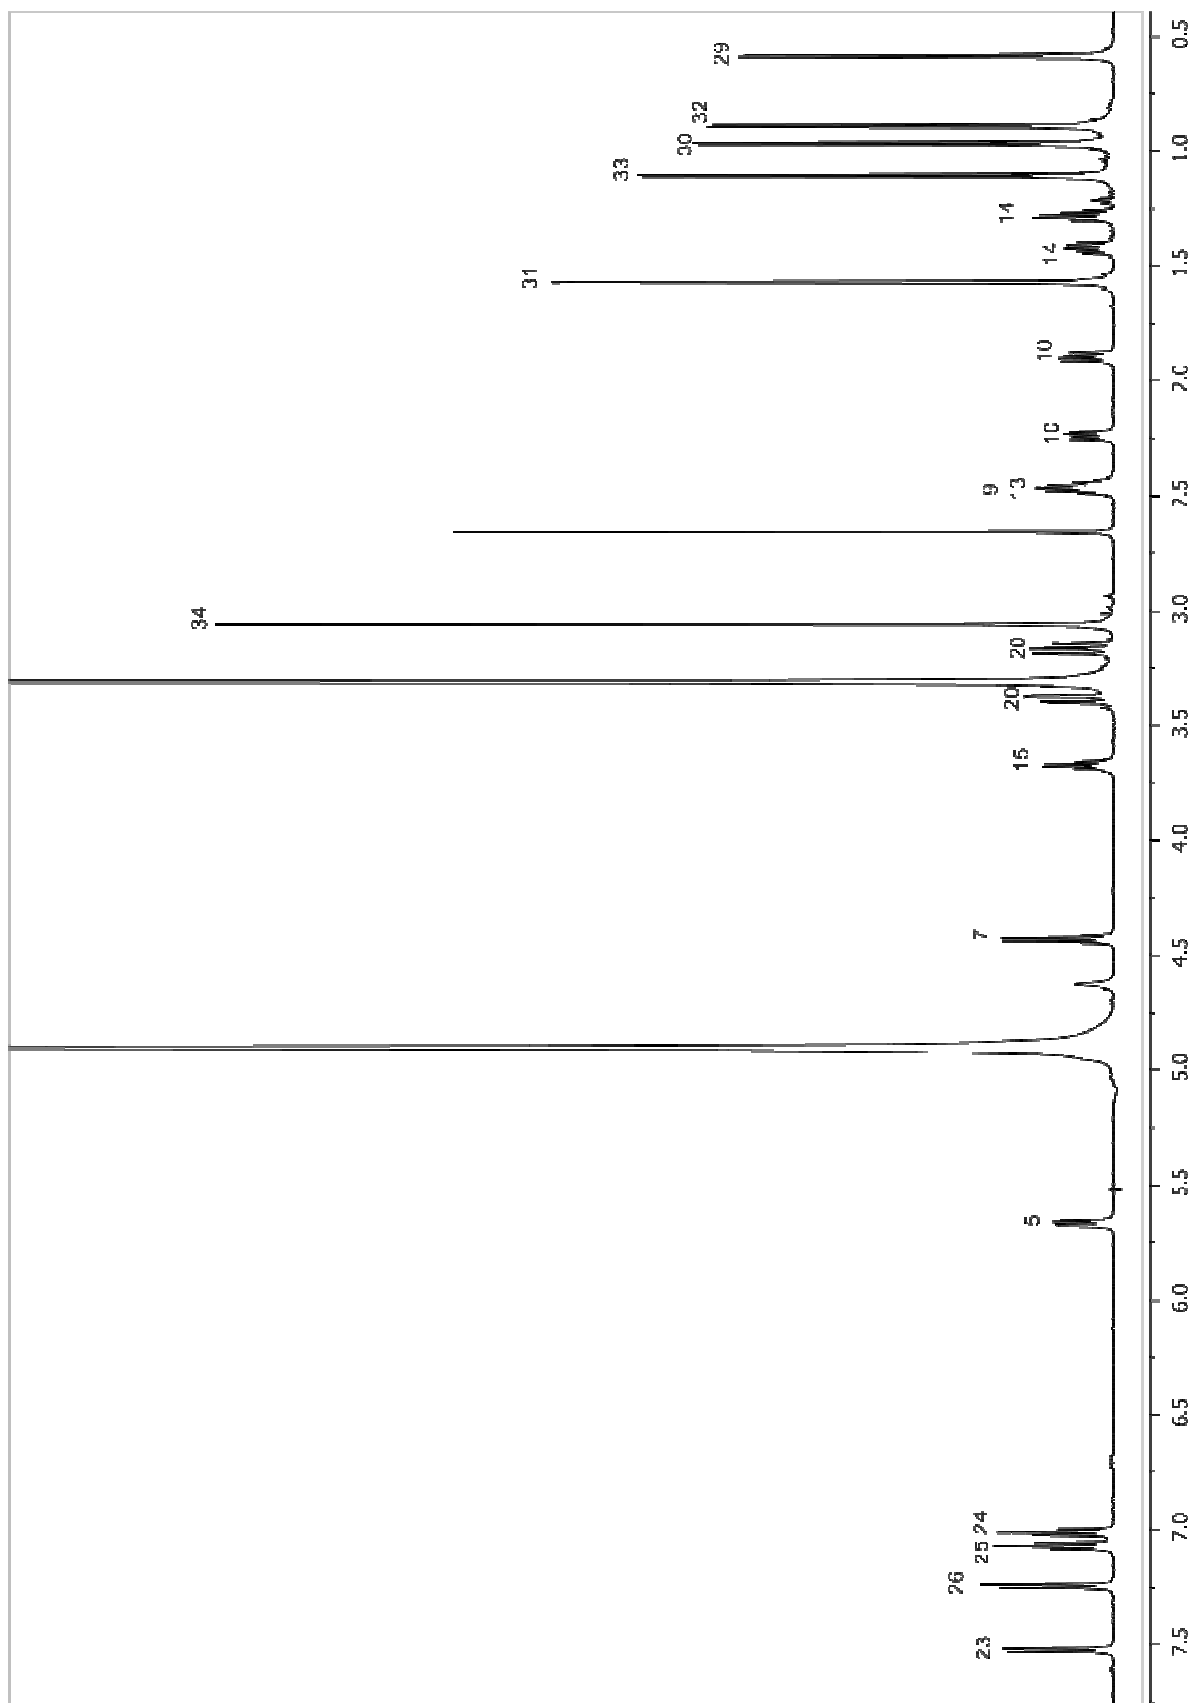

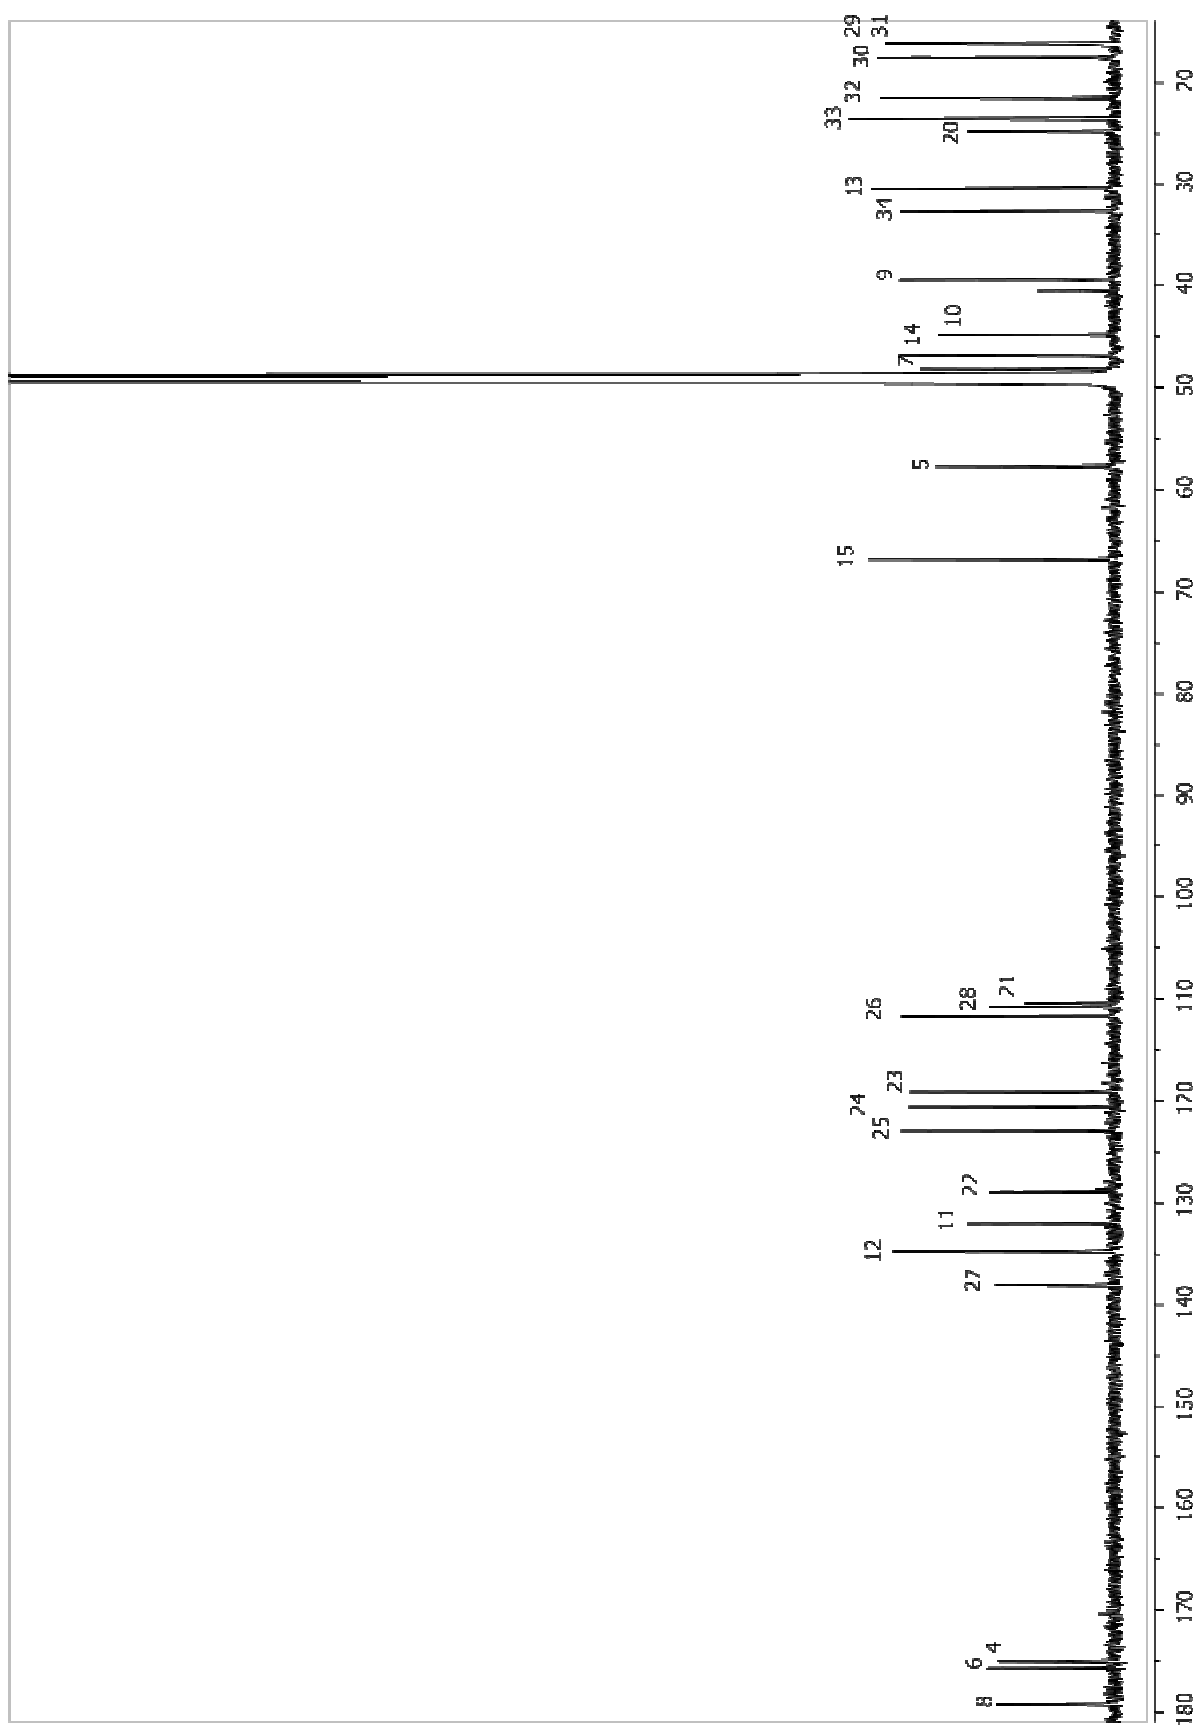

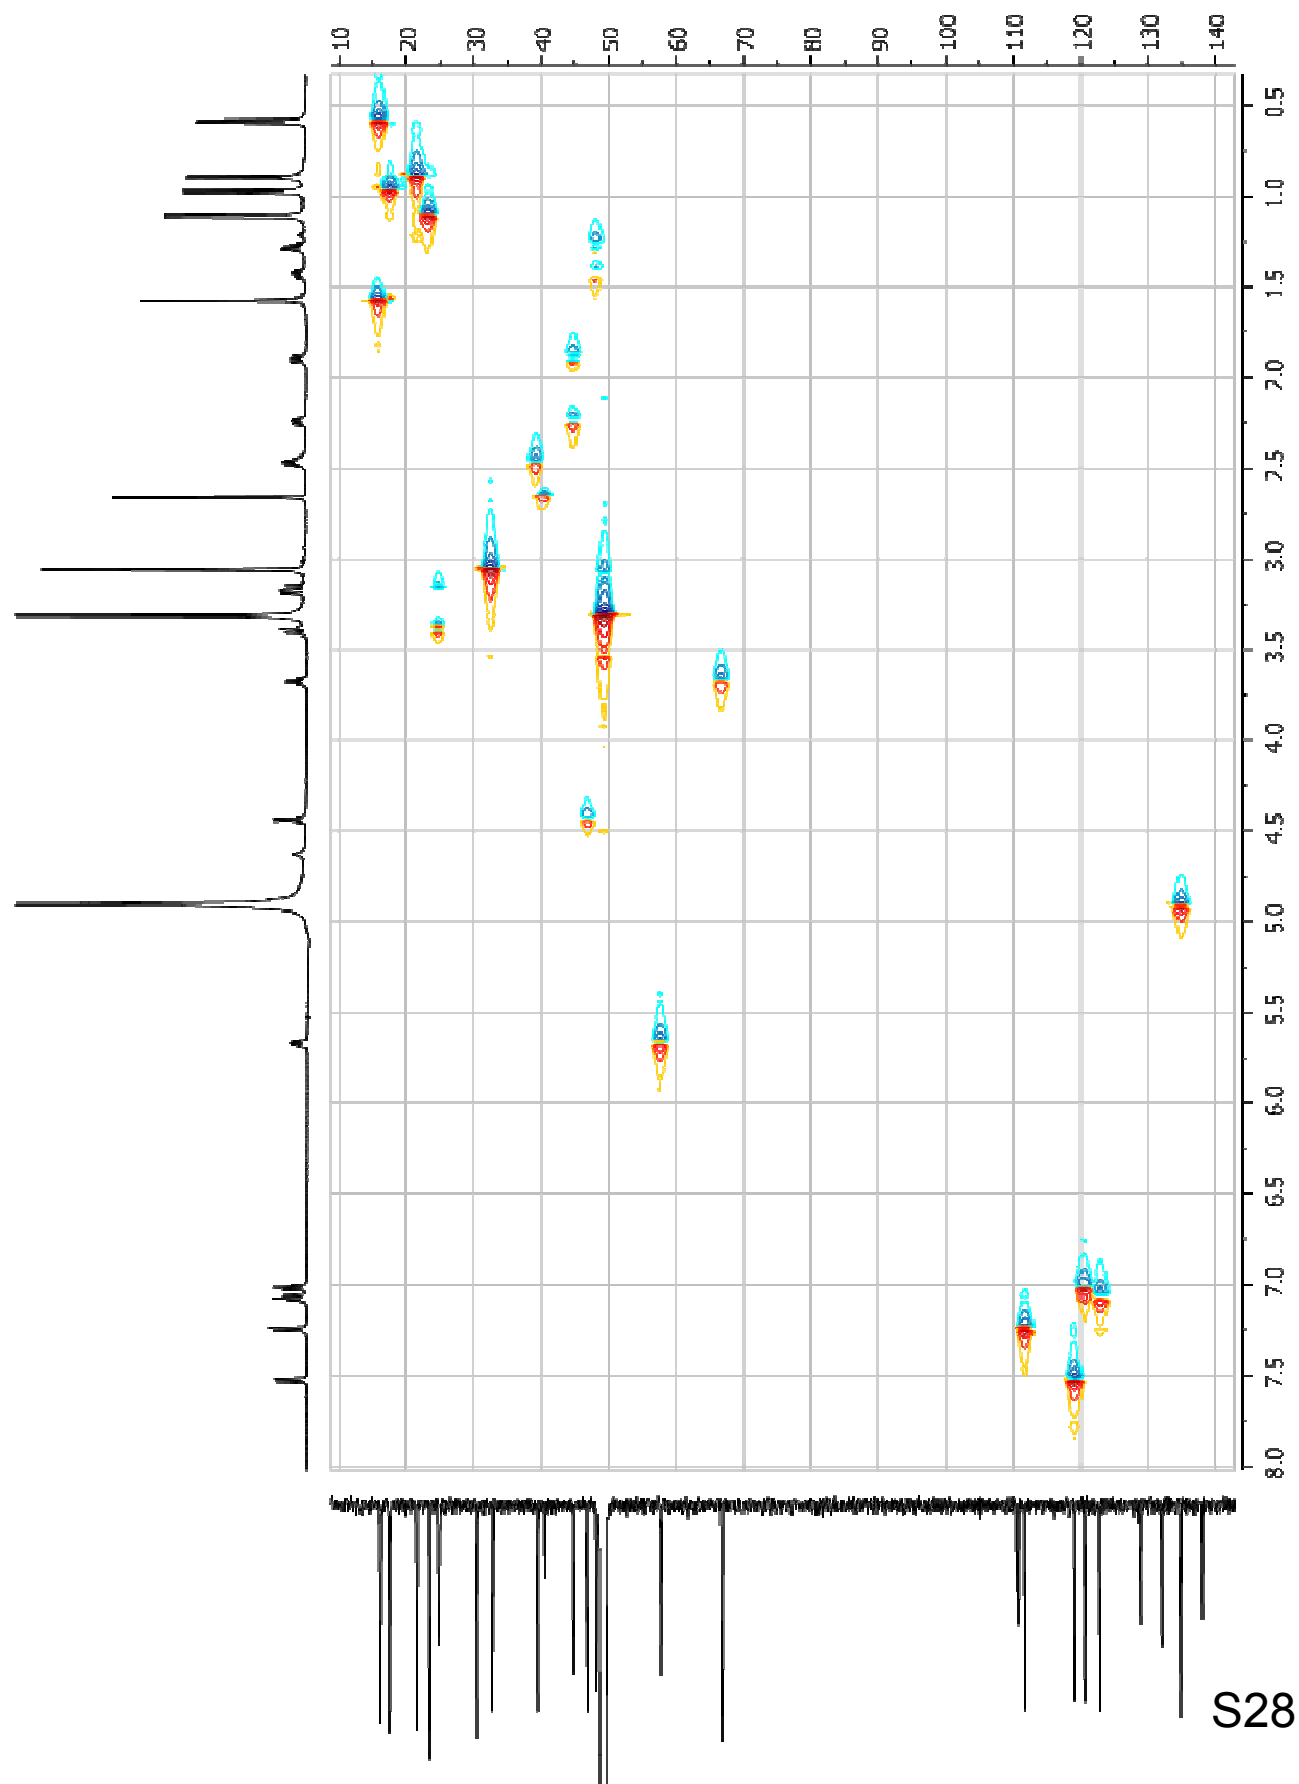

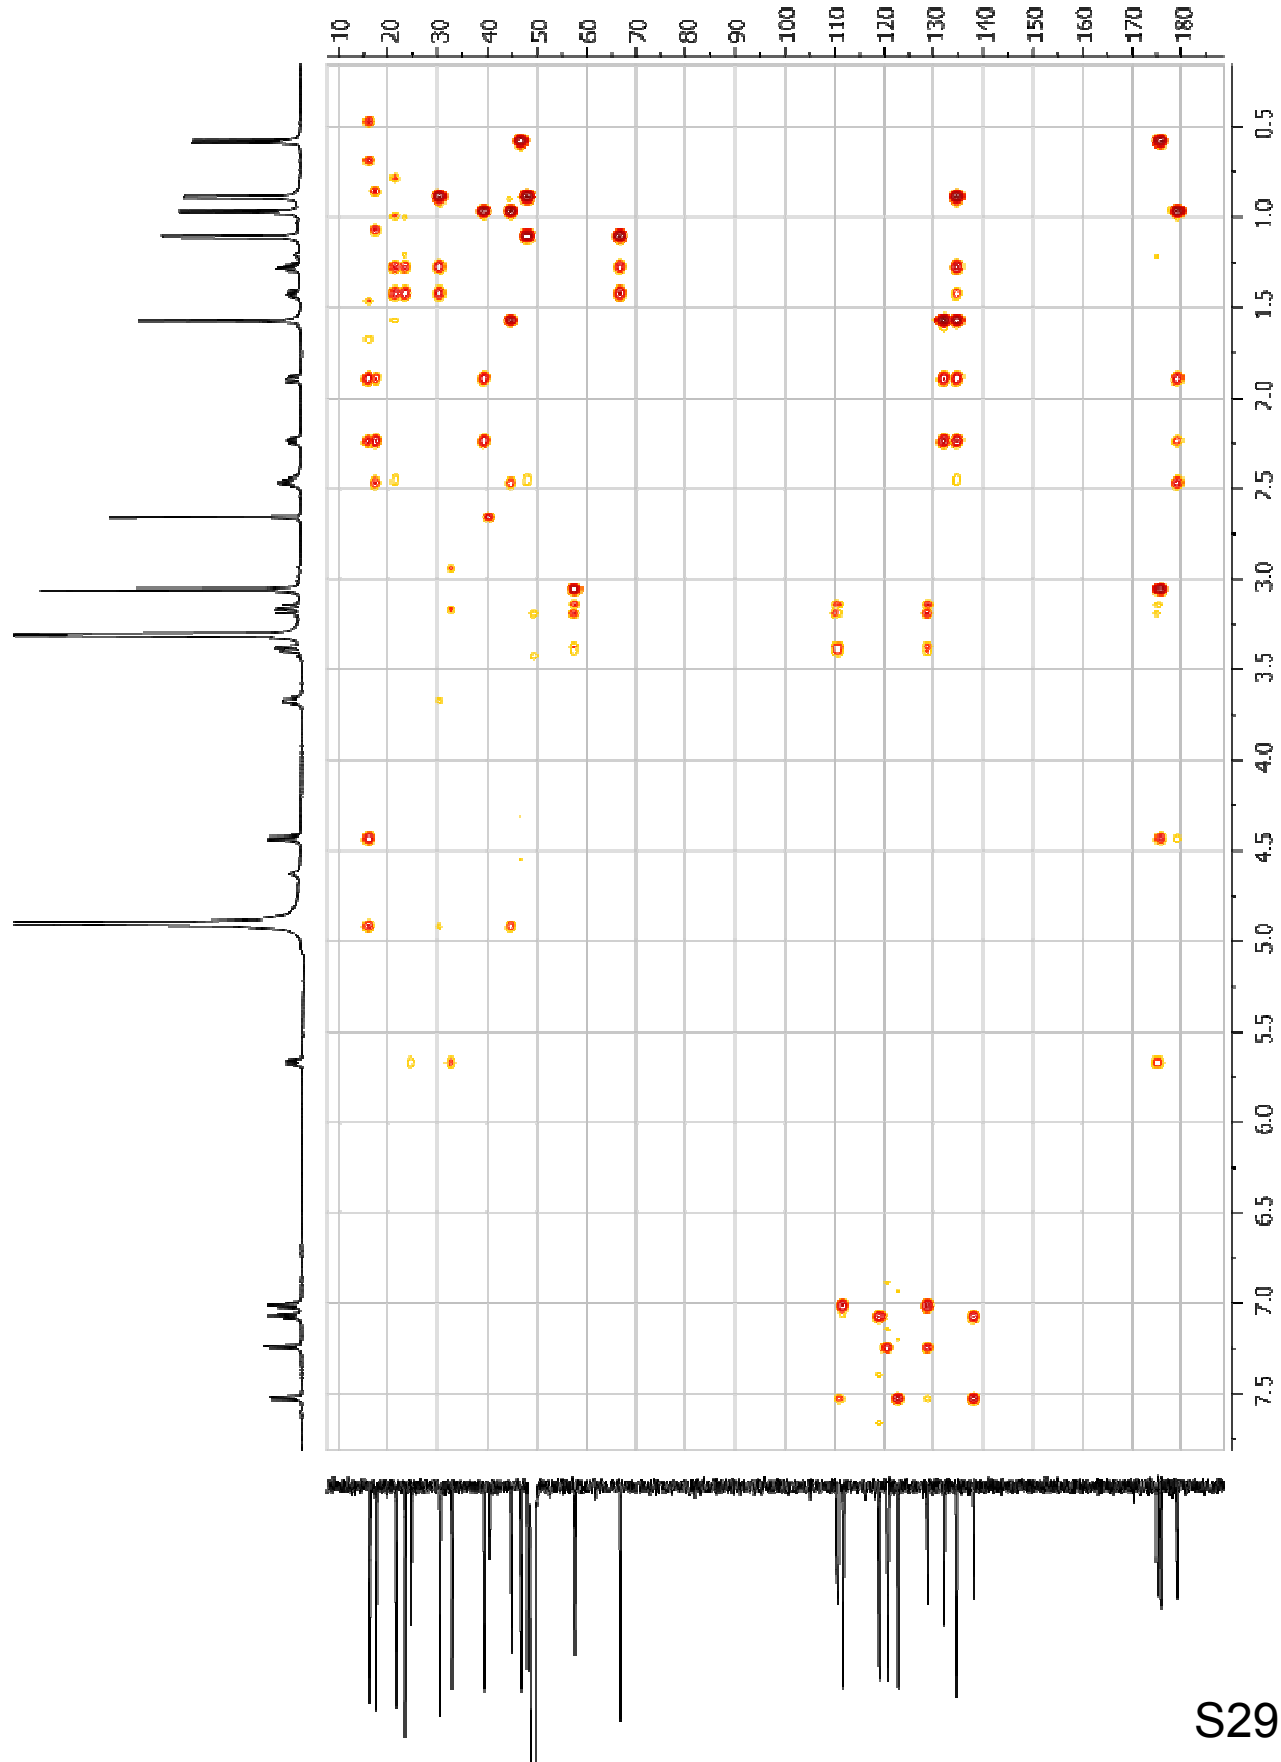

Figure S10.  $^1\text{H}$ ,  $^{13}\text{C}$ , gHMQC, and gHMBC spectra for **13** in  $\text{CD}_3\text{OD}$ .

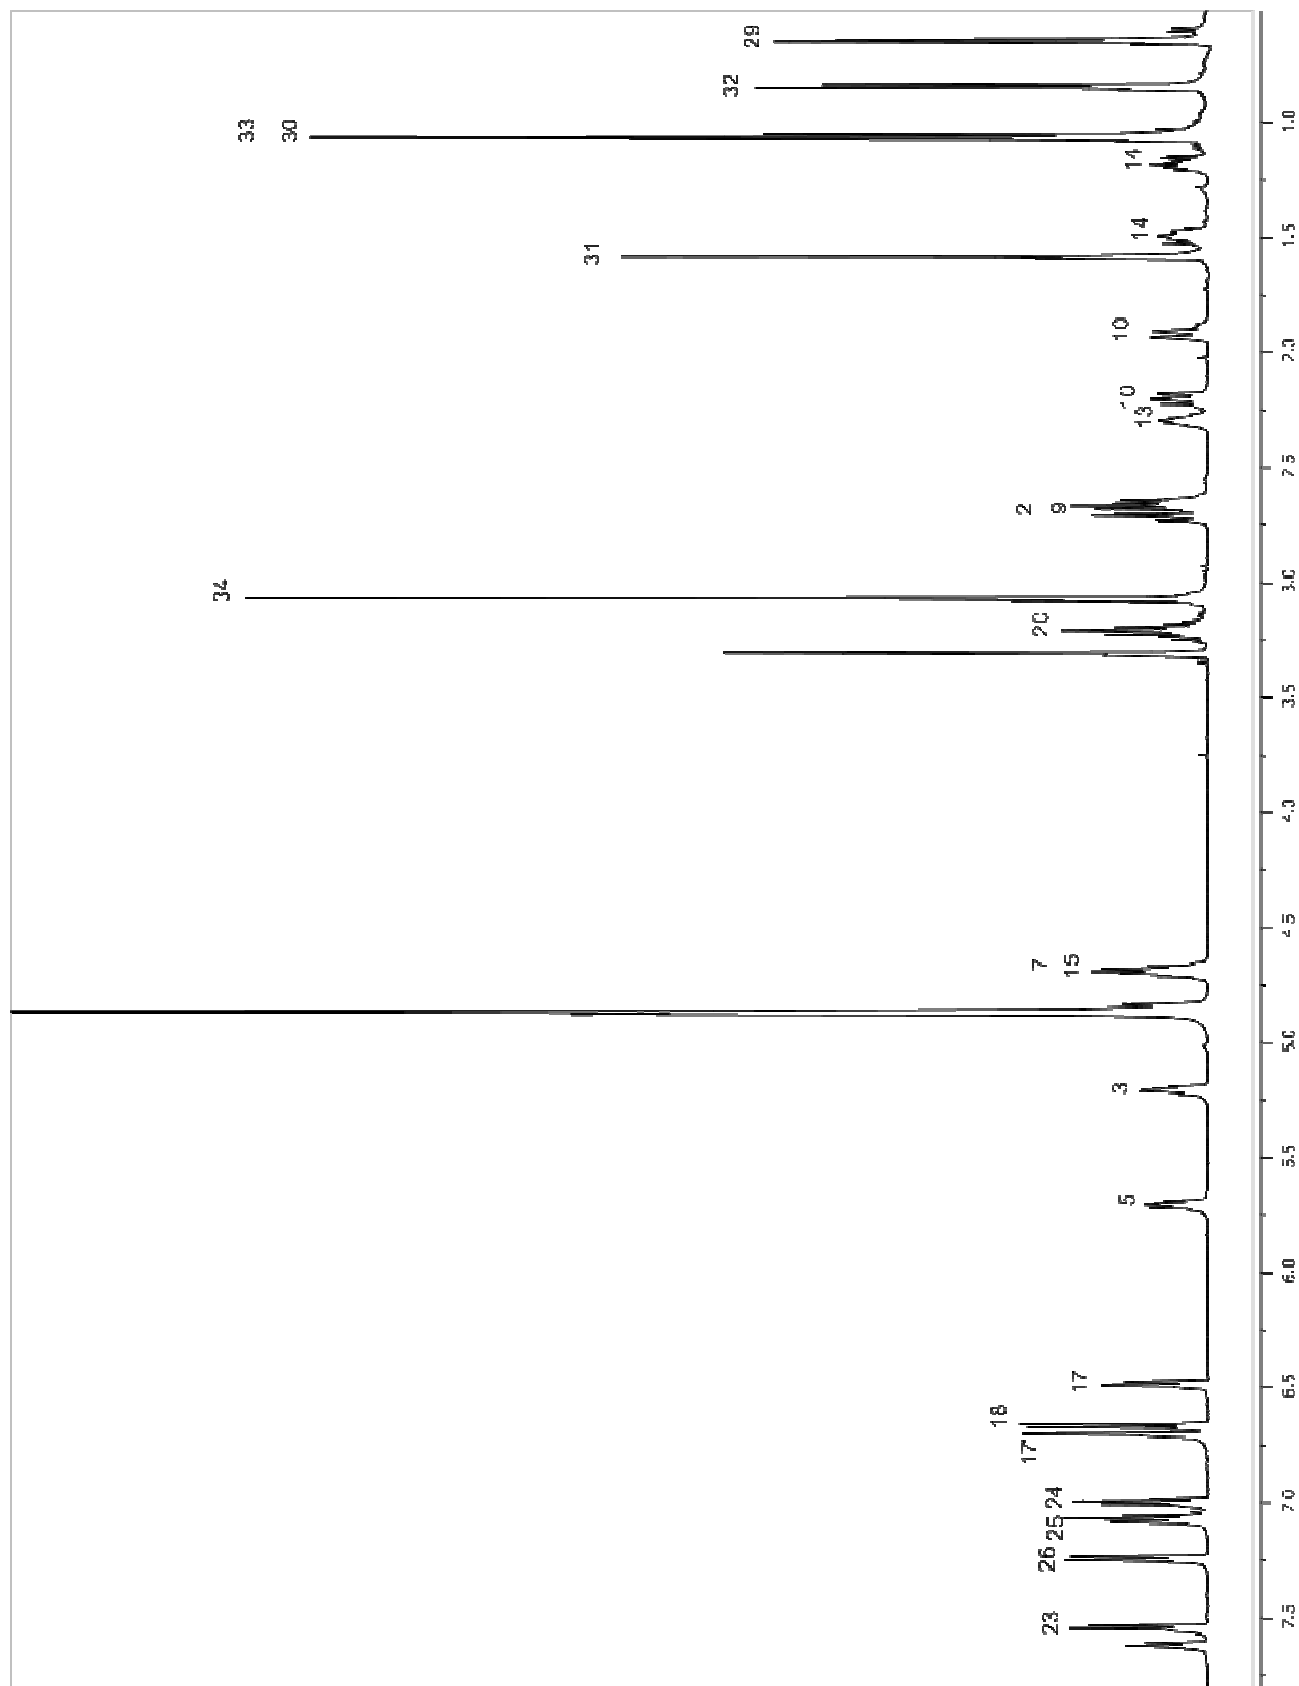

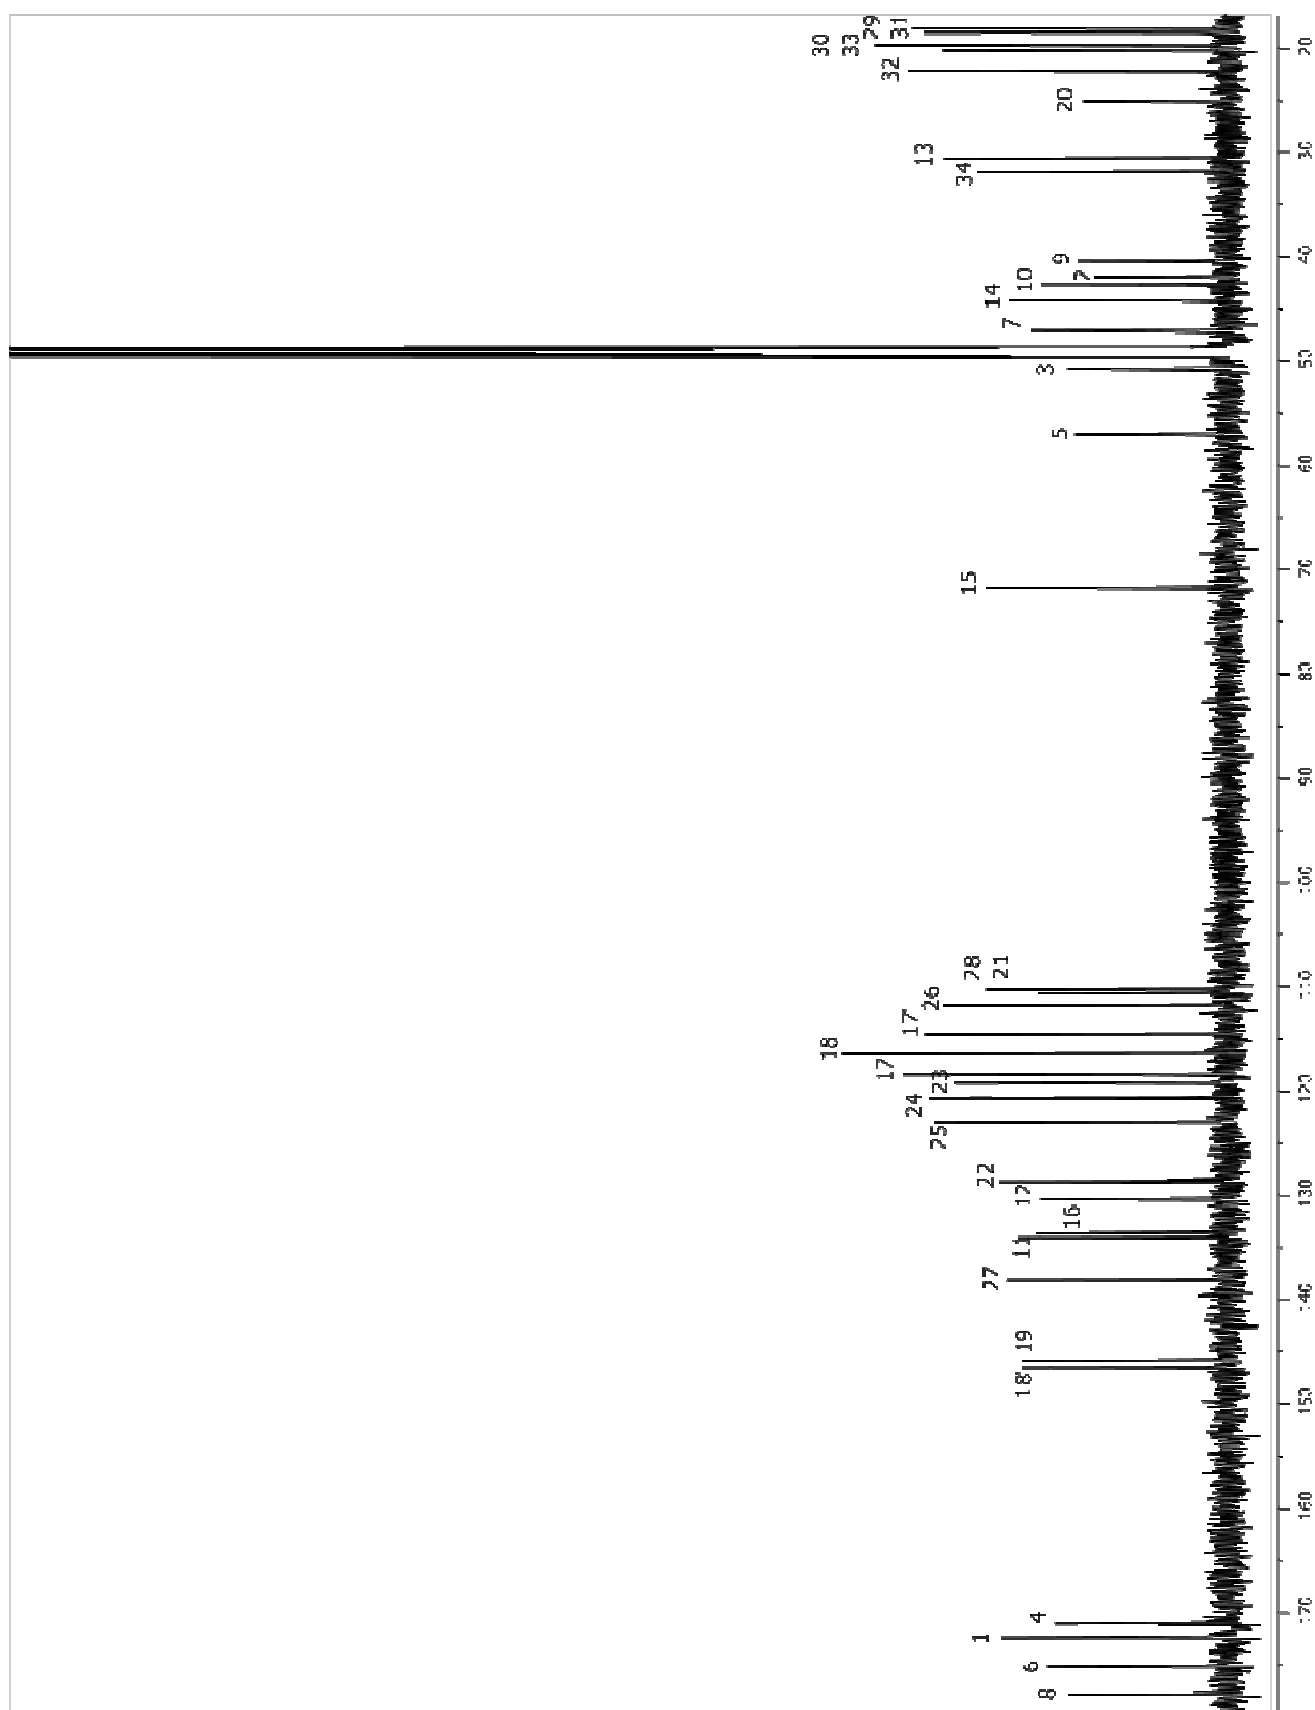

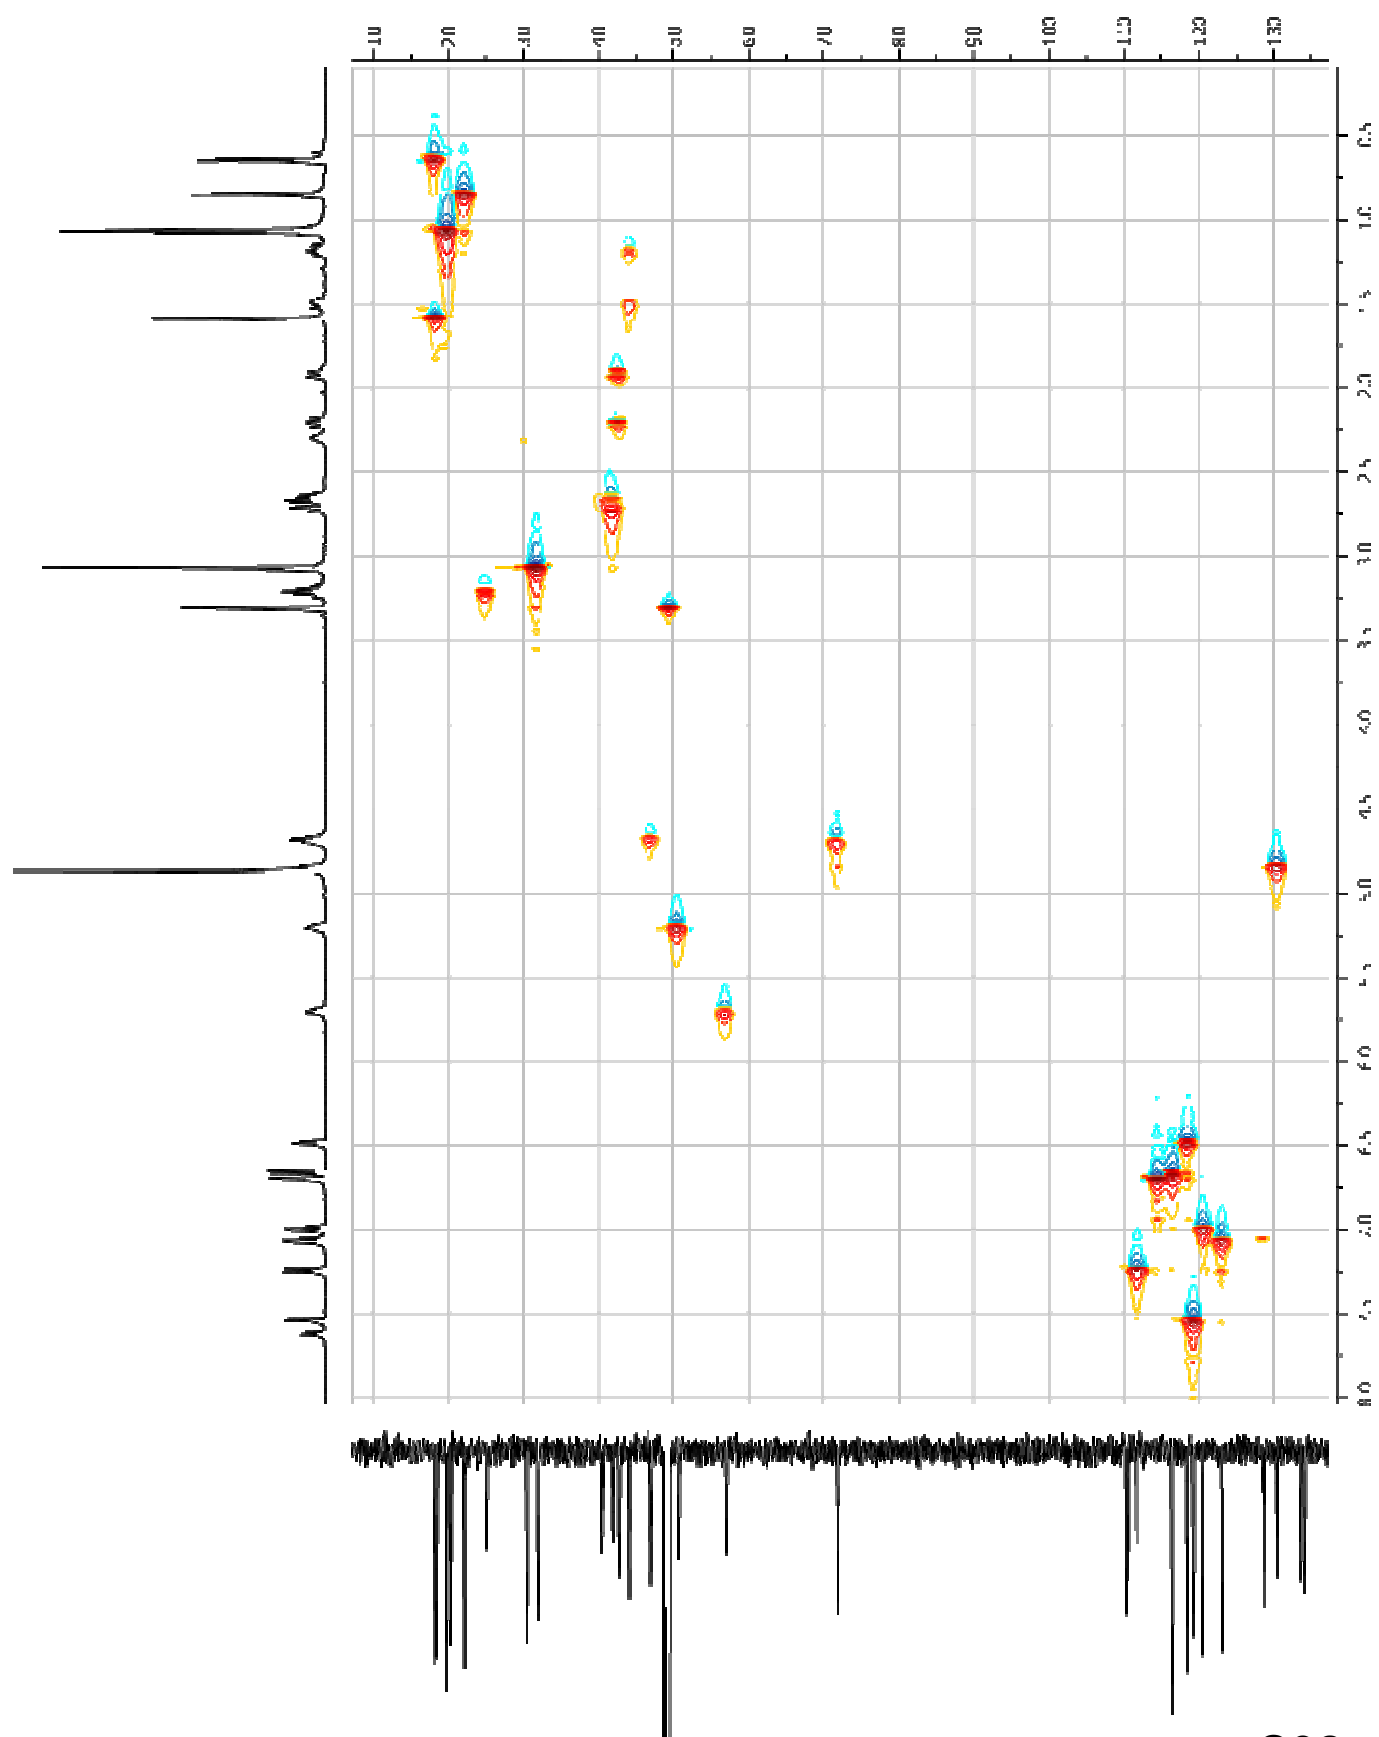



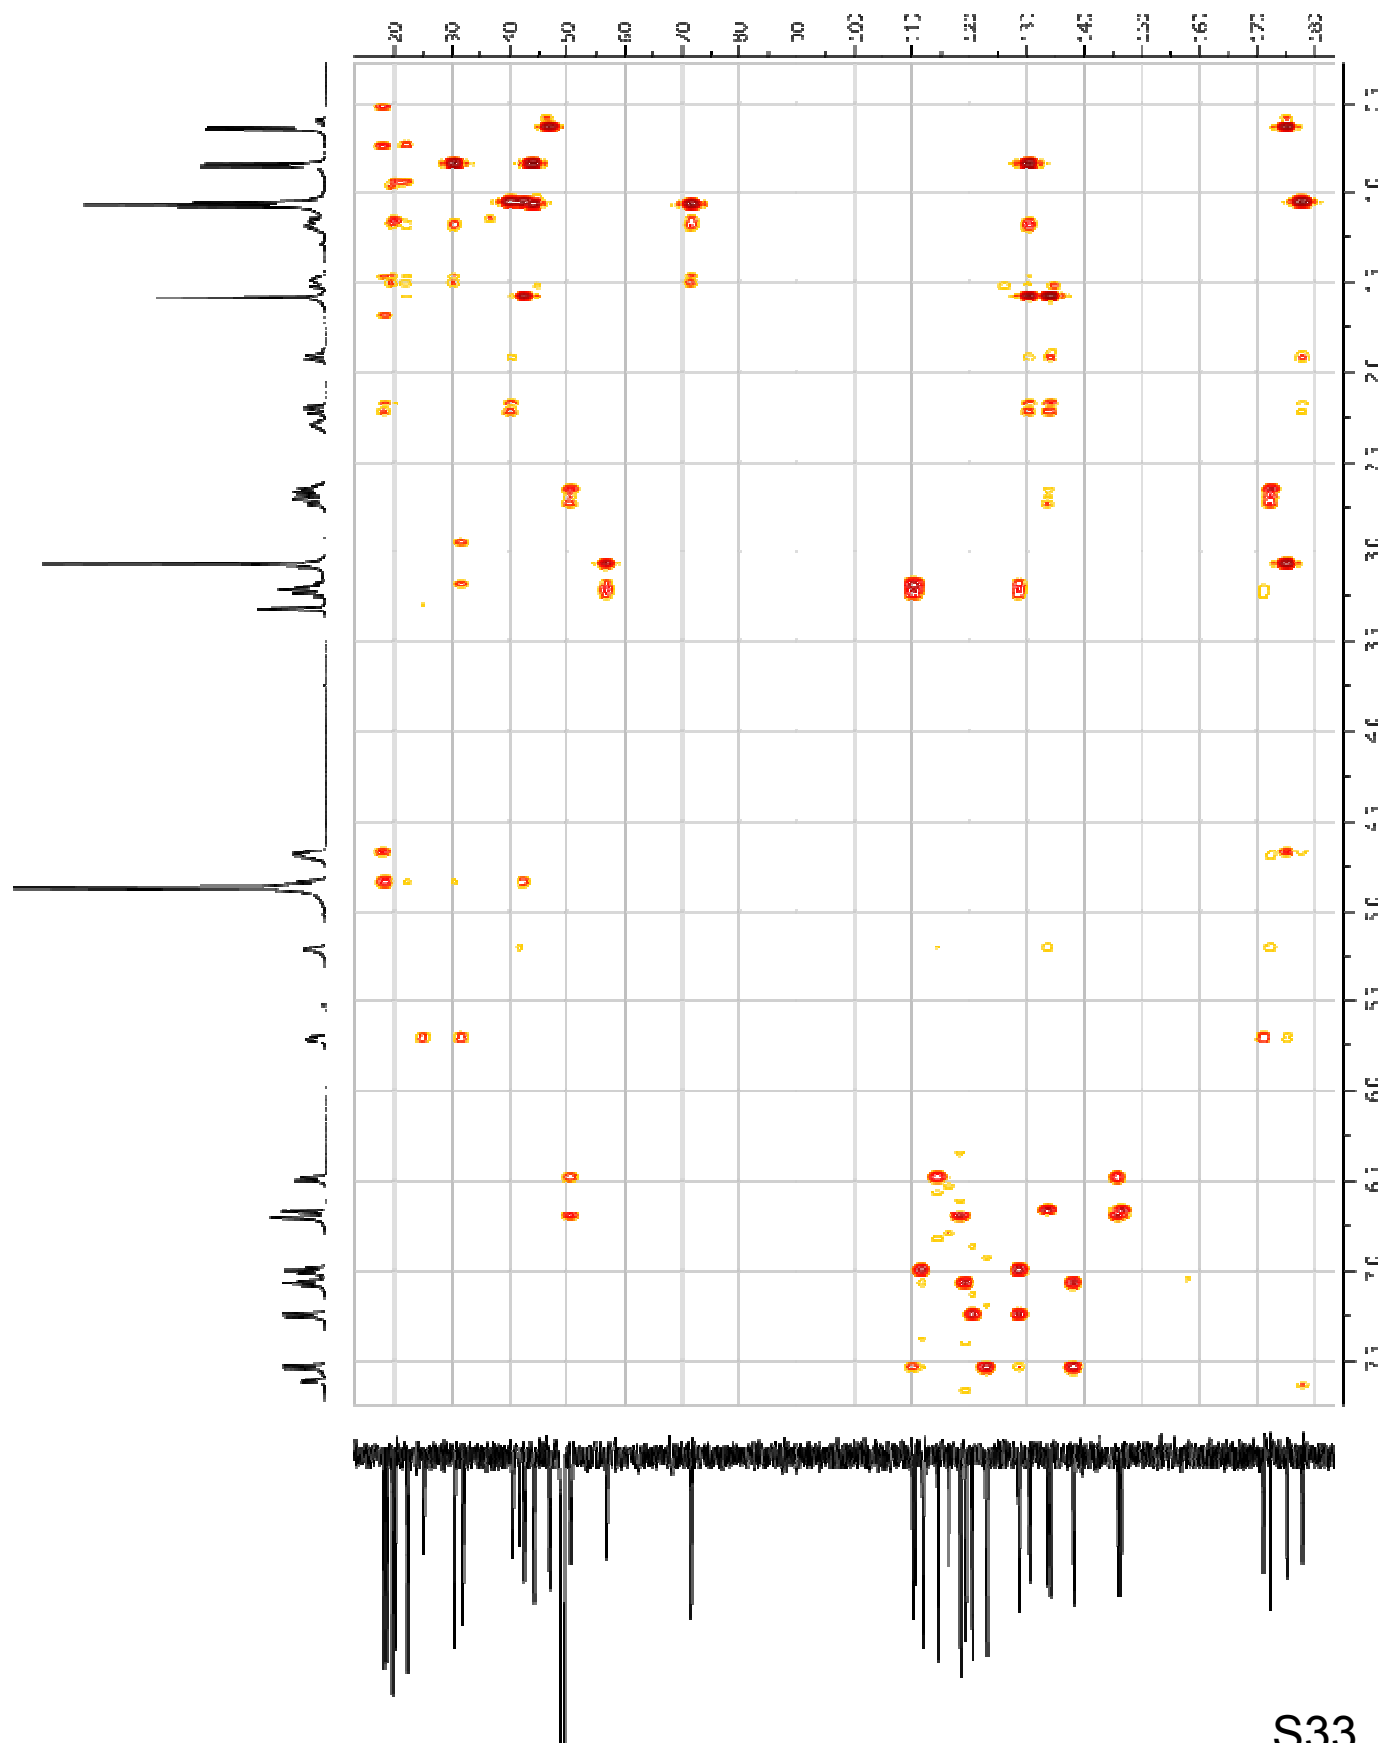

Figure S11.  $^1\text{H}$ ,  $^{13}\text{C}$ , gHMQC, and gHMBC spectra for **14** in  $\text{CD}_3\text{OD}$ .

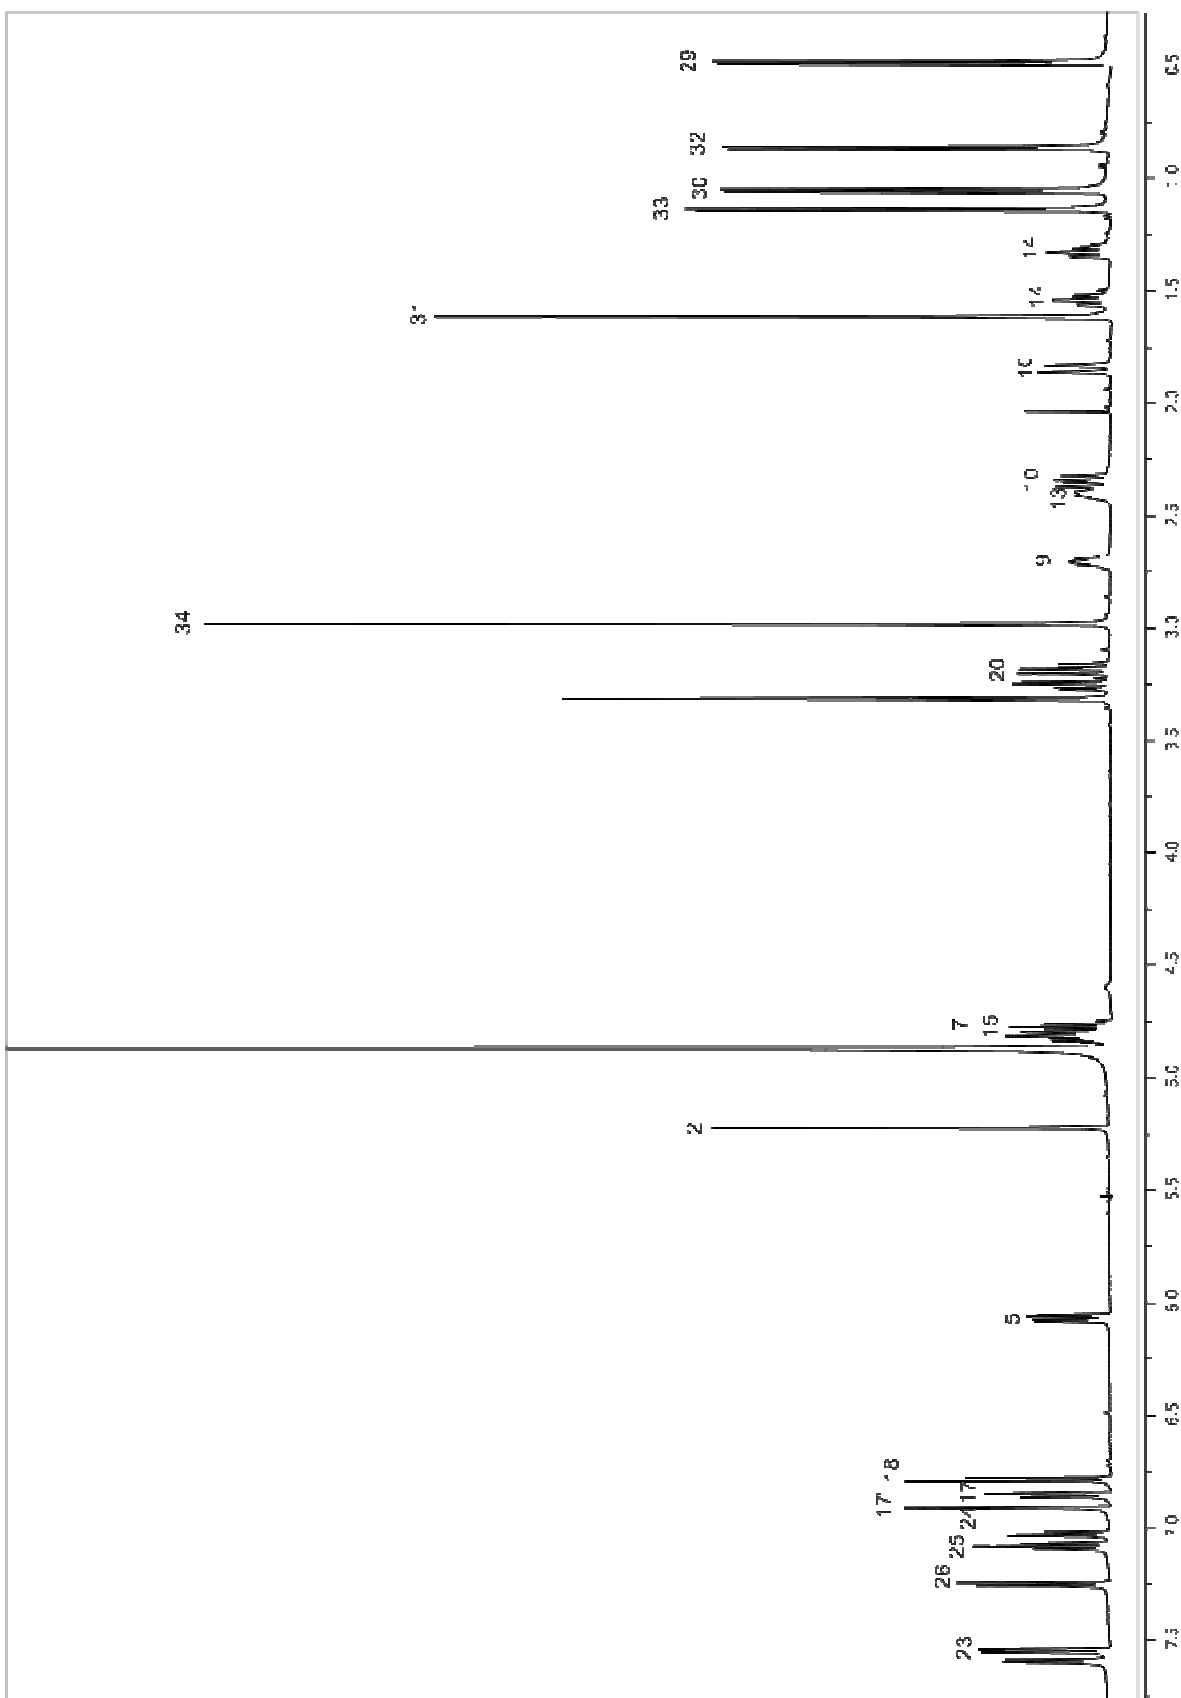

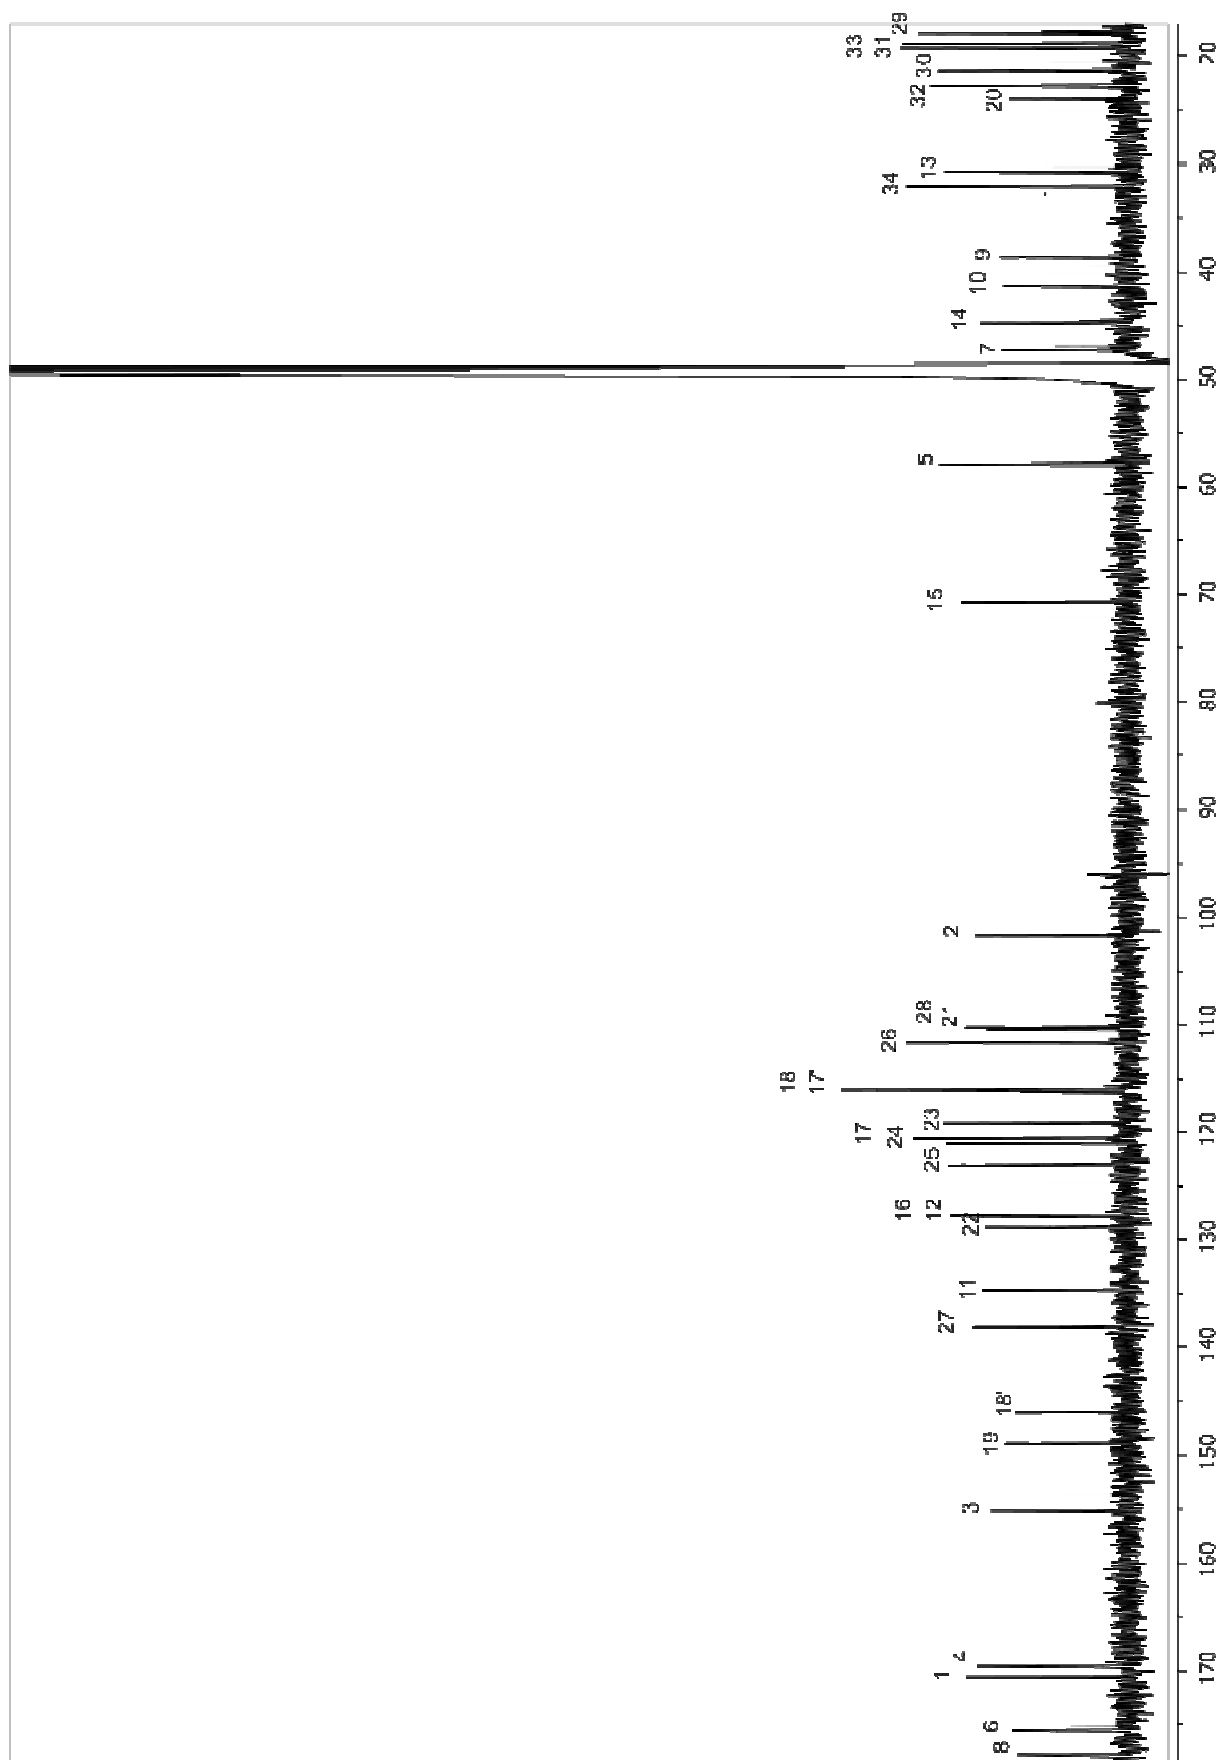

S35

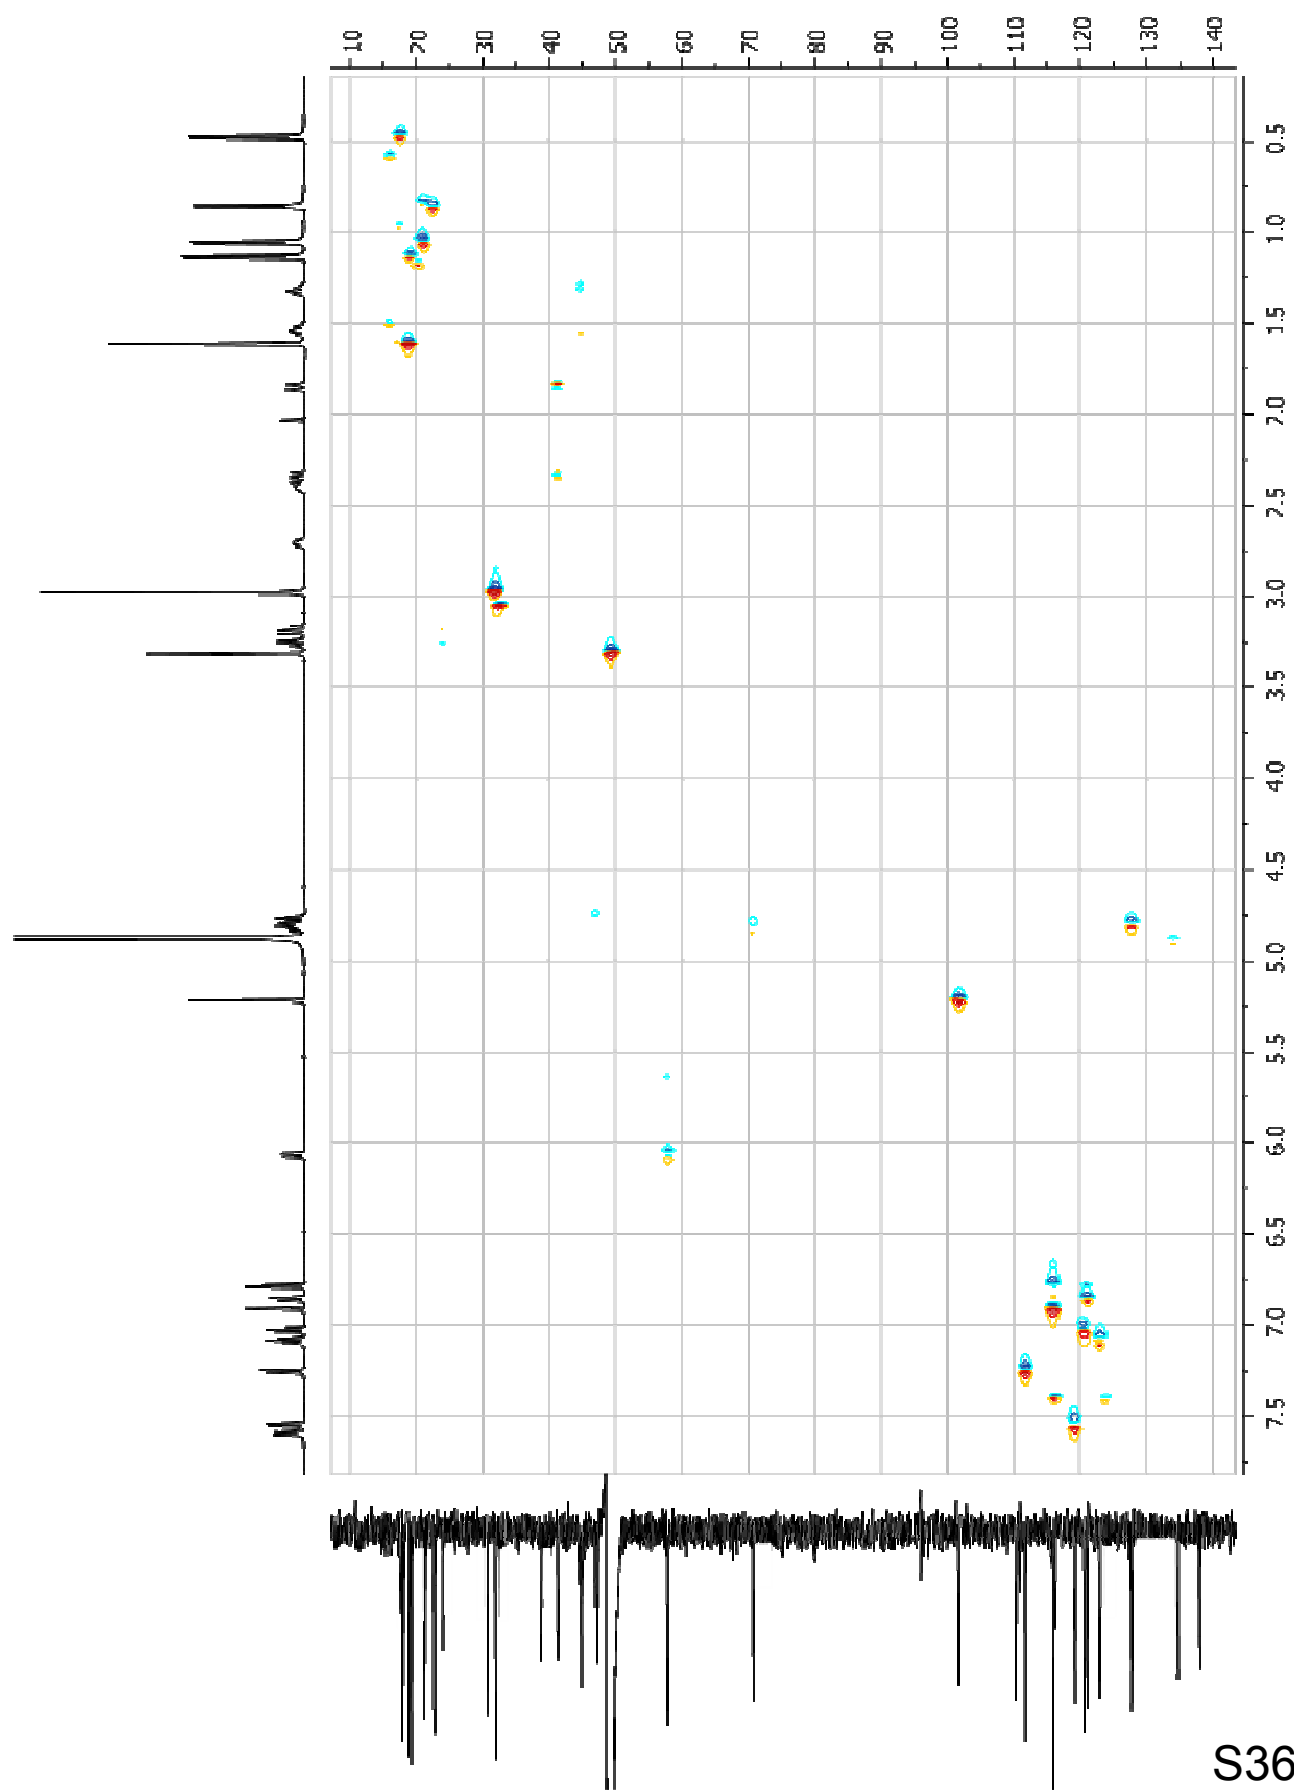

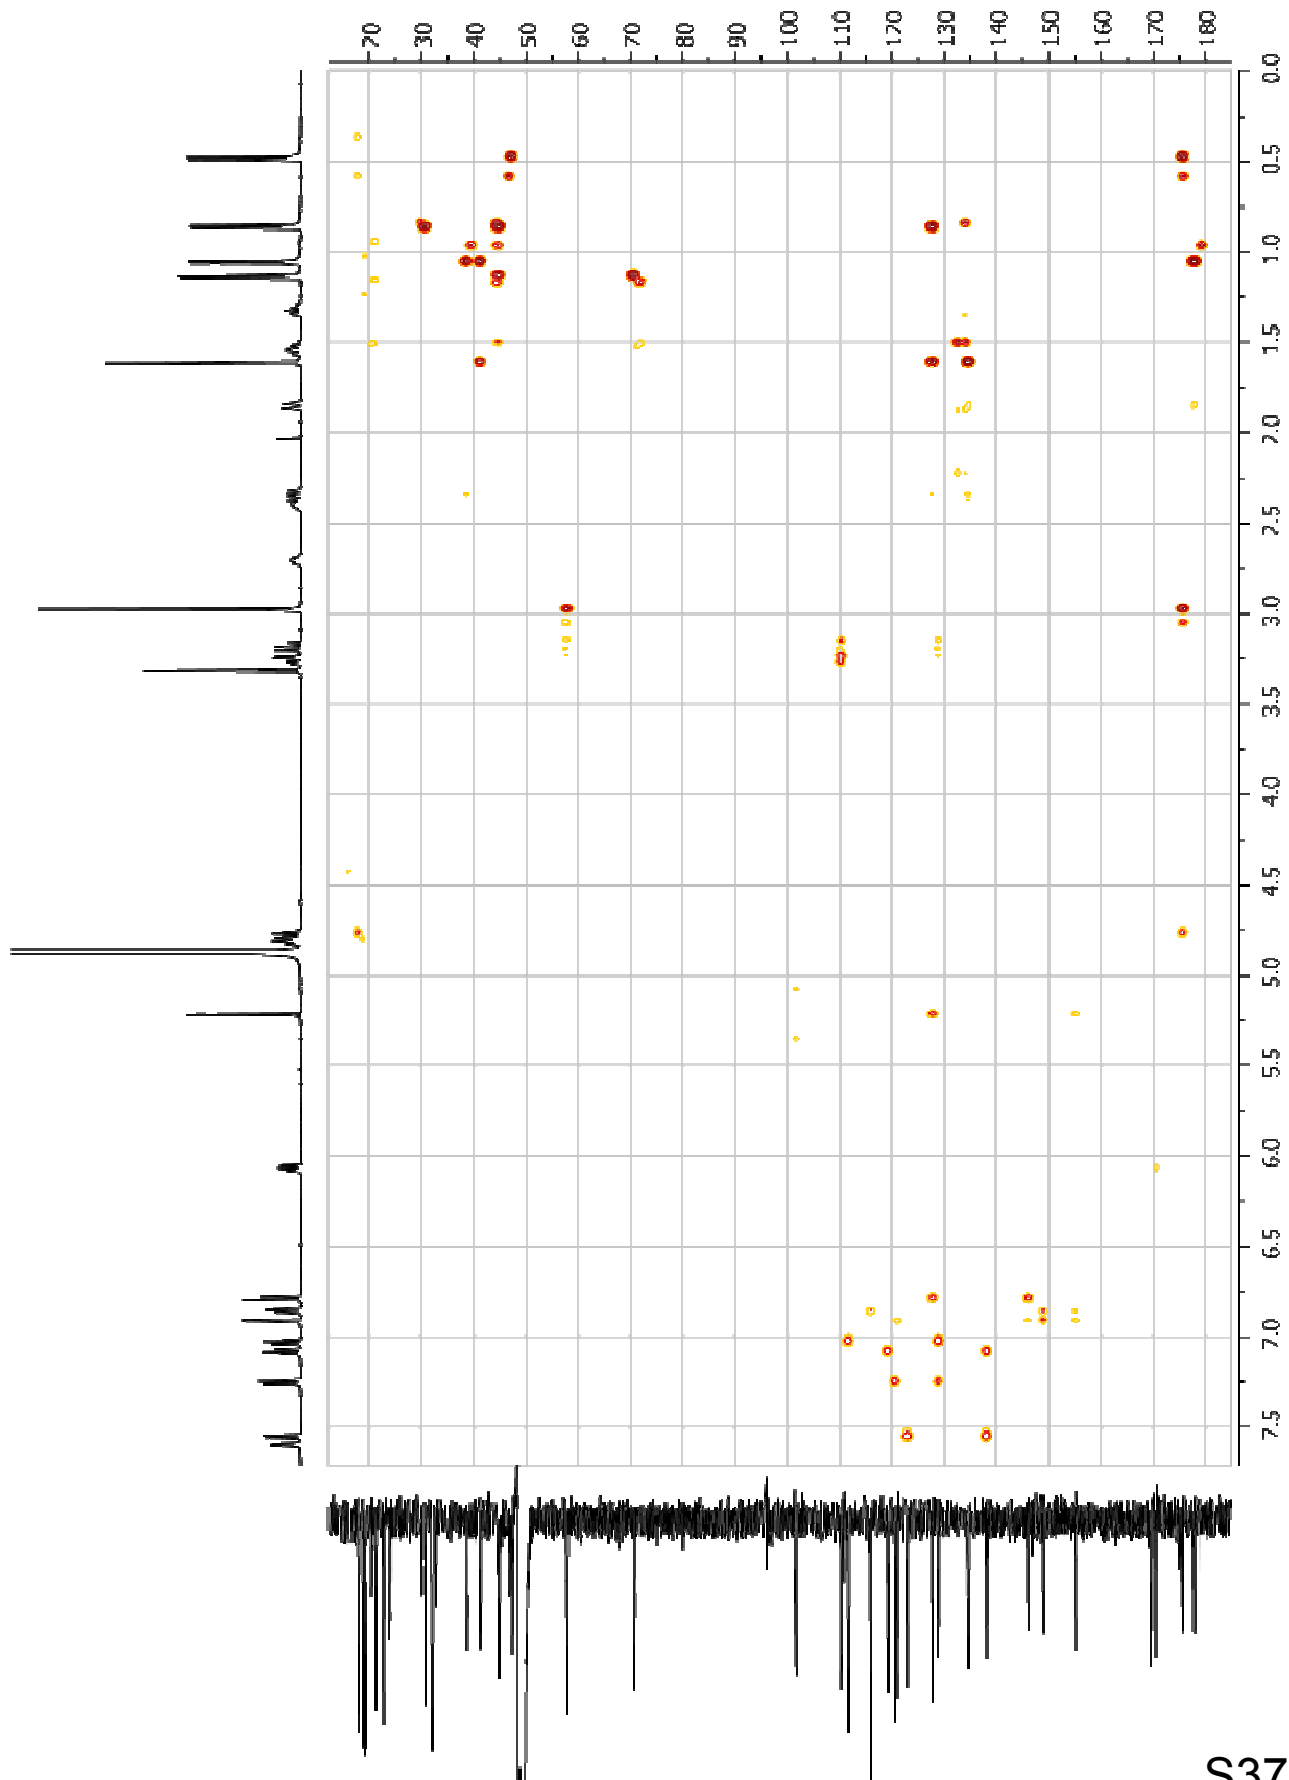

Figure S12.  $^1\text{H}$ ,  $^{13}\text{C}$ , gHMQC, and gHMBC spectra for **15** in  $\text{CDCl}_3$ .

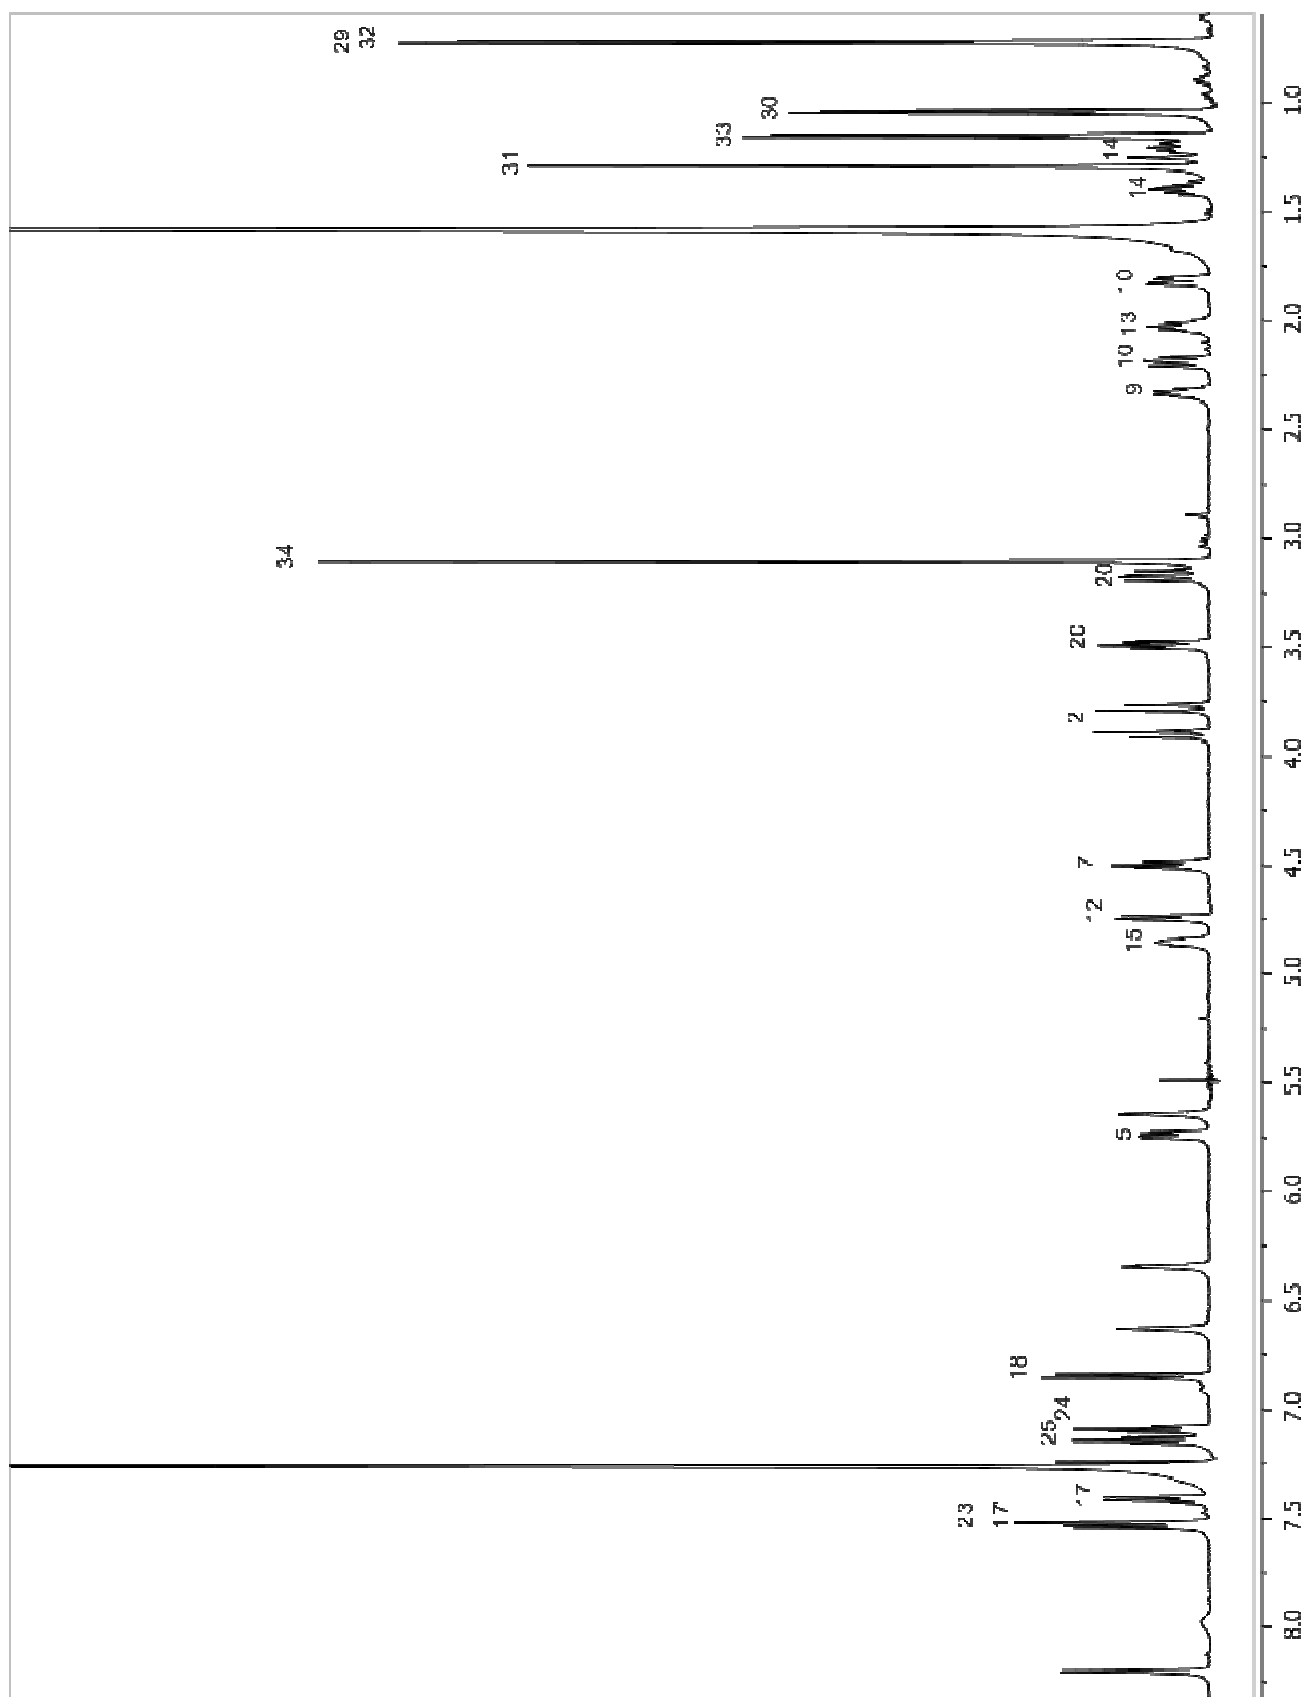

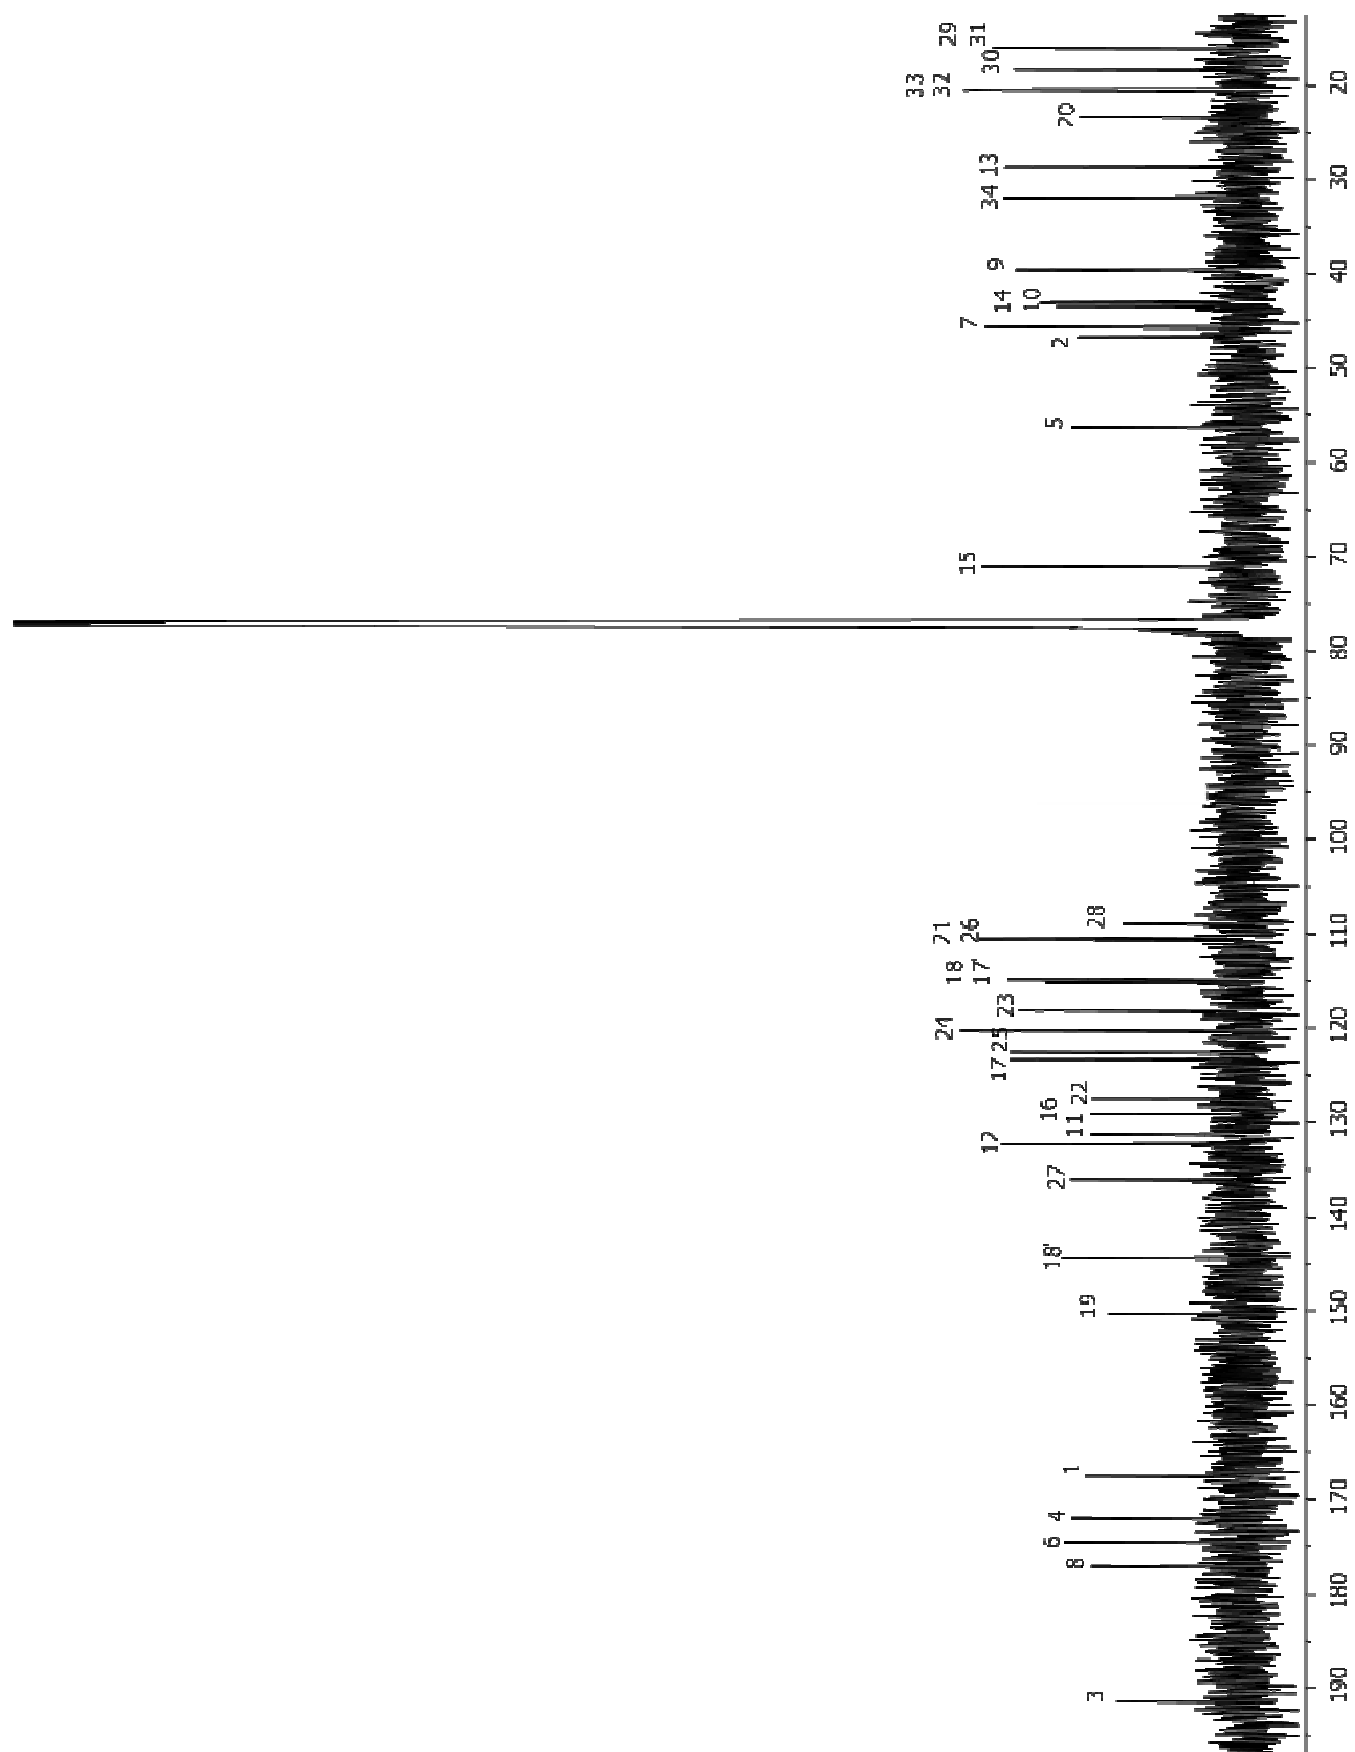

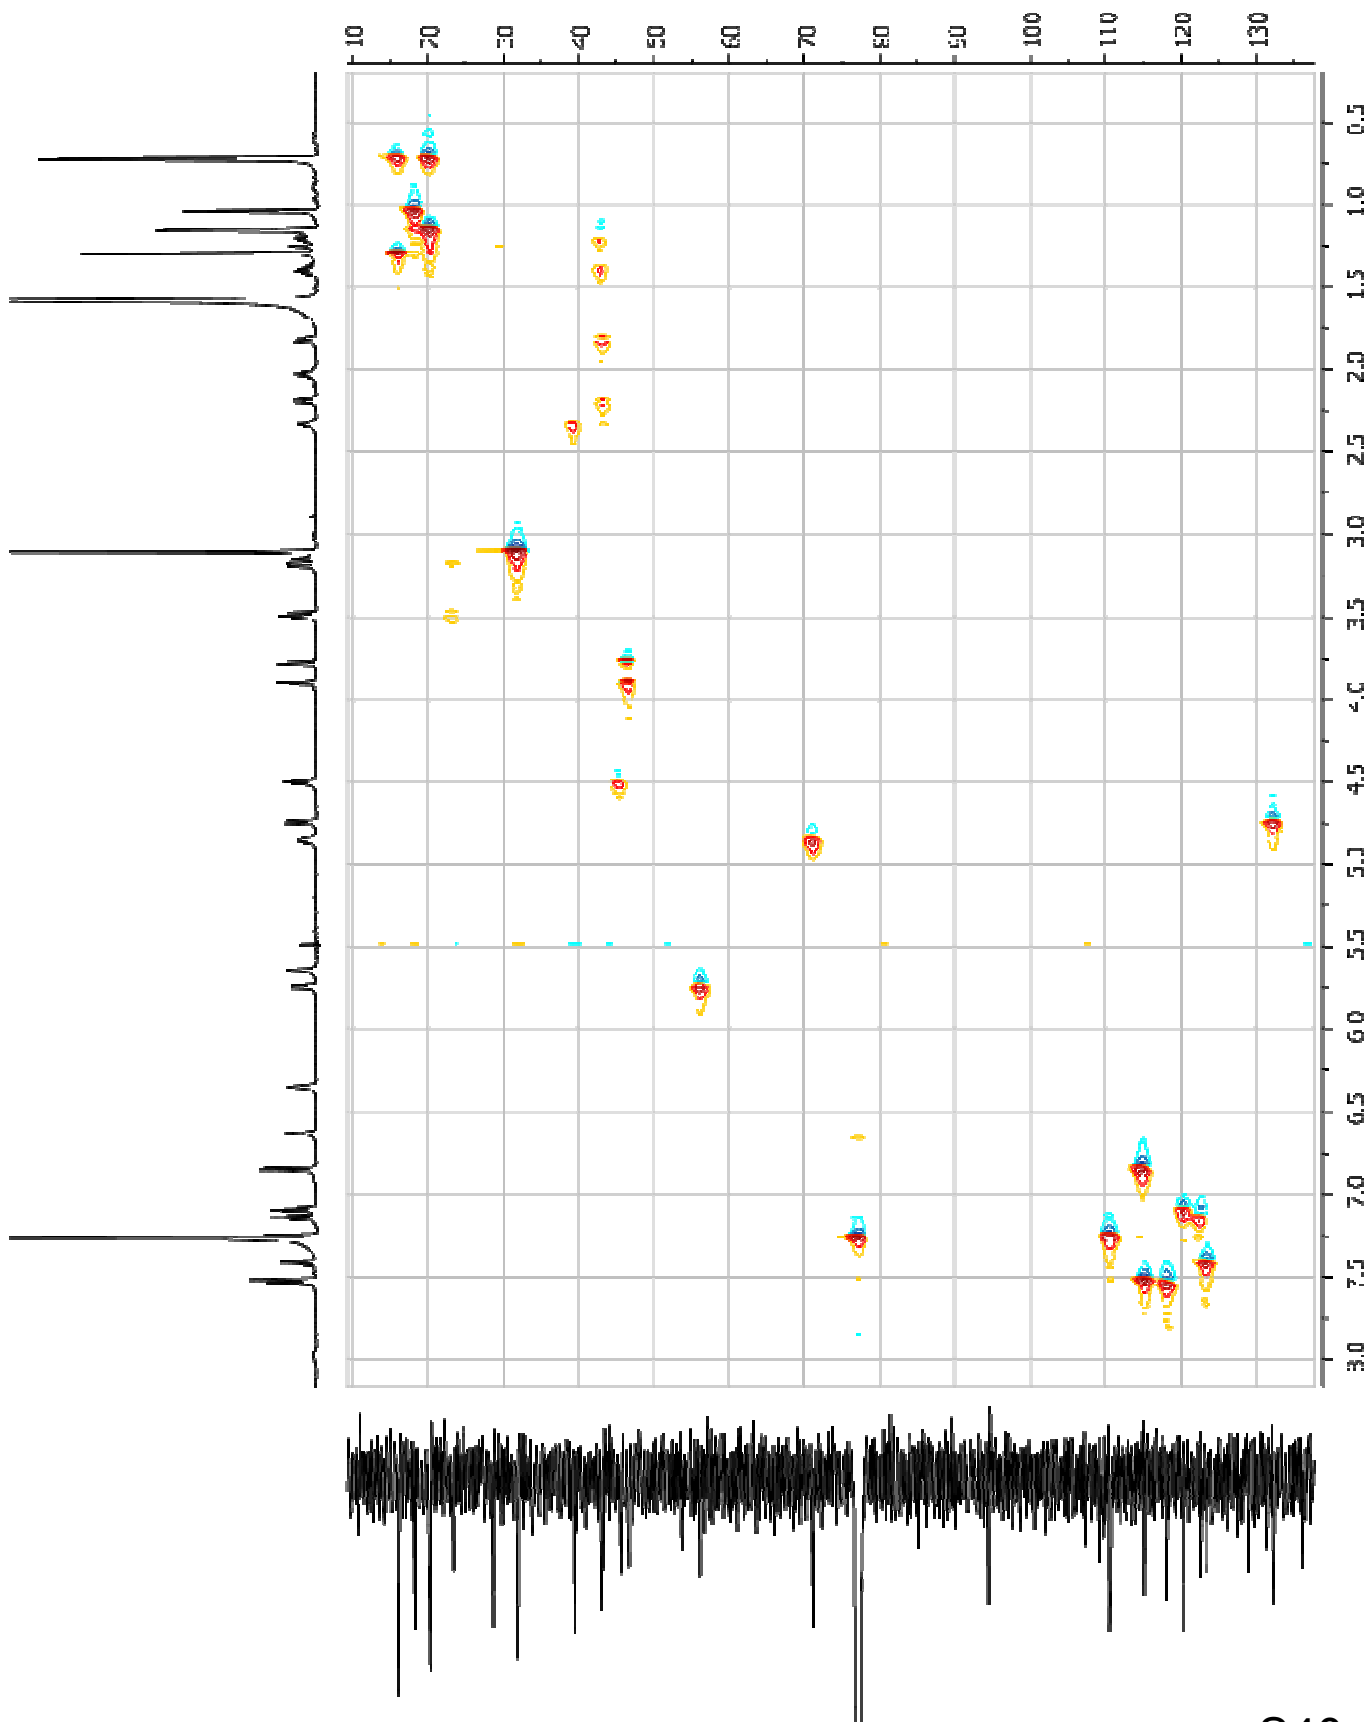



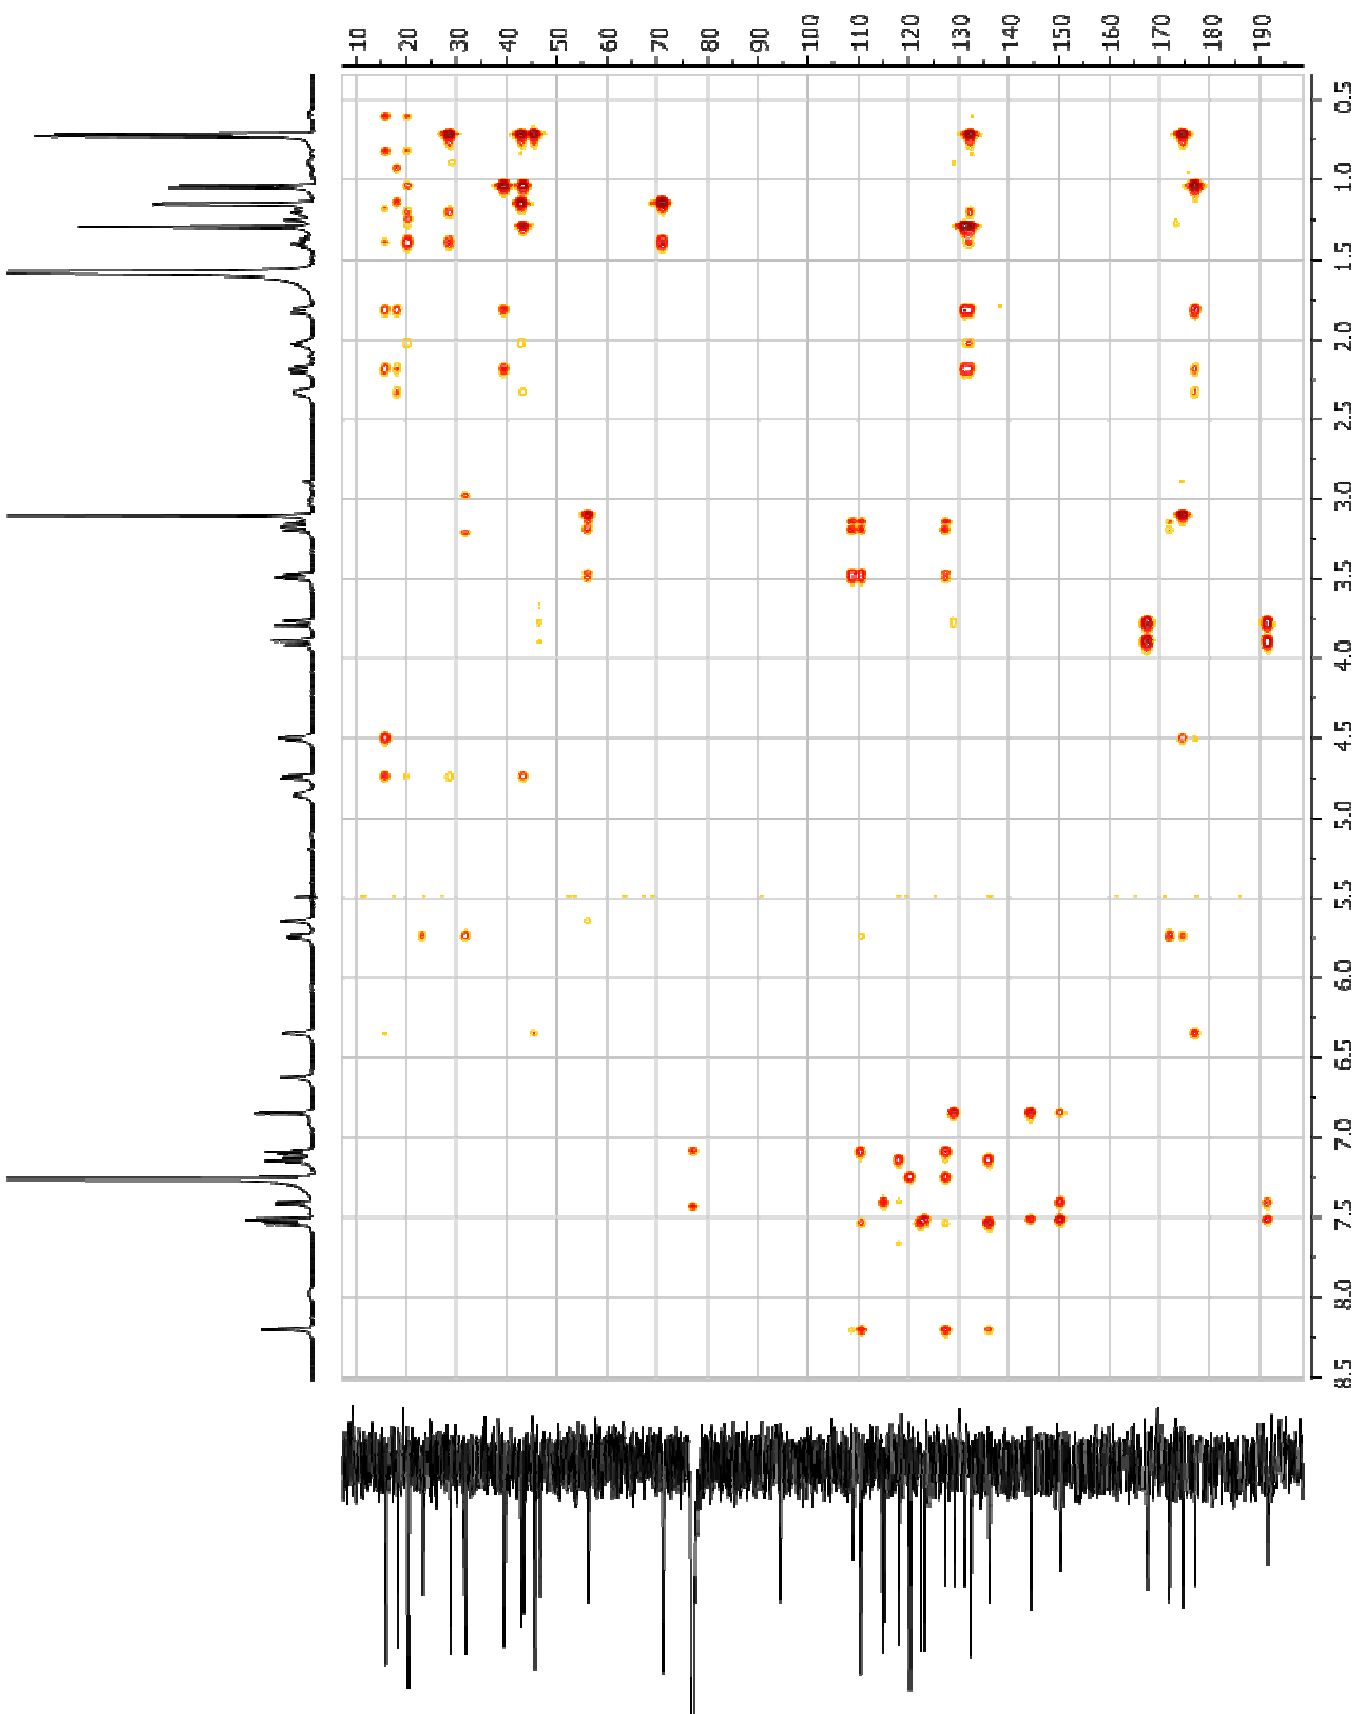

Table S1. NCI 60-cell line results for 1.

National Cancer Institute Developmental Therapeutics Program  
In-Vitro Testing Results

| NSC : 613009 / 10               |           |       | Experiment ID : 9704SR27              |       |       |       |       |      |      |      |      |      | Test Type : 08 |           |           | Units : Molar |  |
|---------------------------------|-----------|-------|---------------------------------------|-------|-------|-------|-------|------|------|------|------|------|----------------|-----------|-----------|---------------|--|
| Report Date : February 24, 2010 |           |       | Test Date : April 14, 1997            |       |       |       |       |      |      |      |      |      | QNS :          |           | MC :      |               |  |
| COMI : Jasplakinolide           |           |       | Stain Reagent : SRB Dual-Pass Related |       |       |       |       |      |      |      |      |      | SSPL : K24A    |           |           |               |  |
| Log10 Concentration             |           |       |                                       |       |       |       |       |      |      |      |      |      |                |           |           |               |  |
| Panel/Cell Line                 | Time Zero | Ctrl  | -8.0                                  | -7.0  | -6.0  | -5.0  | -4.0  | -8.0 | -7.0 | -6.0 | -5.0 | -4.0 | GI50           | TGI       | LC50      |               |  |
| Leukemia                        |           |       |                                       |       |       |       |       |      |      |      |      |      |                |           |           |               |  |
| CCRF-CEM                        | 0.419     | 1.454 | 1.025                                 | 0.604 | 0.568 | 0.585 | 0.528 | 59   | 18   | 14   | 16   | 11   | 1.62E-8        | > 1.00E-4 | > 1.00E-4 |               |  |
| HL-60(TB)                       | 0.566     | 1.526 | 1.056                                 | 0.430 | 0.420 | 0.407 | 0.382 | 51   | -24  | -26  | -28  | -33  | 1.03E-8        | 4.78E-8   | > 1.00E-4 |               |  |
| K-562                           | 0.180     | 0.896 | 0.580                                 | 0.506 | 0.467 | 0.217 | 0.181 | 56   | 45   | 40   | 5    | .    | 3.64E-8        | > 1.00E-4 | > 1.00E-4 |               |  |
| RPMI-8226                       | 0.610     | 0.762 | 0.510                                 | 0.524 | 0.462 | 0.353 | 0.317 | -16  | -14  | -24  | -42  | -48  | < 1.00E-8      | < 1.00E-8 | > 1.00E-4 |               |  |
| SR                              | 0.568     | 0.927 | 0.901                                 | 0.762 | 0.598 | 0.537 | 0.470 | 93   | 54   | 8    | -6   | -17  | 1.23E-7        | 3.99E-6   | > 1.00E-4 |               |  |
| Non-Small Cell Lung Cancer      |           |       |                                       |       |       |       |       |      |      |      |      |      |                |           |           |               |  |
| A549/ATCC                       | 0.433     | 1.836 | 1.769                                 | 0.631 | 0.527 | 0.478 | 0.409 | 95   | 14   | 7    | 3    | -6   | 3.61E-8        | 2.33E-5   | > 1.00E-4 |               |  |
| EKVX                            | 0.325     | 0.820 | 0.792                                 | 0.510 | 0.326 | 0.312 | 0.312 | 94   | 37   | .    | -4   | -4   | 6.01E-8        | 1.06E-6   | > 1.00E-4 |               |  |
| HOP-62                          | 0.219     | 0.649 | 0.715                                 | 0.301 | 0.181 | 0.188 | 0.191 | 115  | 19   | -17  | -14  | -13  | 4.77E-8        | 3.33E-7   | > 1.00E-4 |               |  |
| HOP-92                          | 0.193     | 1.095 | 1.113                                 | 0.560 | 0.539 | 0.565 | 0.559 | 102  | 41   | 38   | 41   | 41   | 7.05E-8        | > 1.00E-4 | > 1.00E-4 |               |  |
| NCI-H226                        | 0.461     | 0.921 | 0.919                                 | 0.271 | 0.205 | 0.200 | 0.171 | 99   | -41  | -56  | -57  | -63  | 2.25E-8        | 5.09E-8   | 4.11E-7   |               |  |
| NCI-H23                         | 0.779     | 1.482 | 1.528                                 | 1.233 | 0.835 | 0.734 | 0.412 | 107  | 65   | 8    | -6   | -47  | 1.81E-7        | 3.80E-6   | > 1.00E-4 |               |  |
| NCI-H322M                       | 0.239     | 0.790 | 0.728                                 | 0.449 | 0.308 | 0.233 | 0.239 | 89   | 38   | 12   | -3   | .    | 5.82E-8        | 6.79E-6   | > 1.00E-4 |               |  |
| NCI-H460                        | 0.229     | 1.794 | 1.137                                 | 0.564 | 0.538 | 0.481 | 0.336 | 58   | 21   | 20   | 16   | 7    | 1.65E-8        | > 1.00E-4 | > 1.00E-4 |               |  |
| NCI-H522                        | 0.279     | 0.660 | 0.586                                 | 0.303 | 0.250 | 0.234 | 0.182 | 81   | 6    | -11  | -16  | -35  | 2.57E-8        | 2.33E-7   | > 1.00E-4 |               |  |
| Colon Cancer                    |           |       |                                       |       |       |       |       |      |      |      |      |      |                |           |           |               |  |
| COLO 205                        | 0.117     | 0.591 | 0.398                                 | 0.214 | 0.200 | 0.218 | 0.193 | 59   | 20   | 18   | 21   | 16   | 1.73E-8        | > 1.00E-4 | > 1.00E-4 |               |  |
| HCC-2998                        | 0.001     | 0.642 | 0.473                                 | 0.287 | 0.251 | 0.240 | 0.200 | 74   | 45   | 39   | 37   | 31   | 6.52E-8        | > 1.00E-4 | > 1.00E-4 |               |  |
| HCT-116                         | 0.143     | 1.477 | 1.237                                 | 0.484 | 0.217 | 0.218 | 0.101 | 82   | 26   | 6    | 6    | -29  | 3.70E-8        | 1.44E-5   | > 1.00E-4 |               |  |
| HCT-15                          | 0.773     | 1.630 | 1.565                                 | 1.036 | 0.756 | 0.781 | 0.787 | 92   | 31   | -2   | 1    | 2    | 4.87E-8        | .         | > 1.00E-4 |               |  |
| HT29                            | 0.221     | 1.201 | 0.774                                 | 0.282 | 0.253 | 0.250 | 0.209 | 56   | 6    | 3    | 3    | -5   | 1.34E-8        | 2.28E-5   | > 1.00E-4 |               |  |
| KM12                            | 0.280     | 1.459 | 1.257                                 | 0.926 | 0.666 | 0.473 | 0.204 | 83   | 55   | 33   | 16   | -27  | 1.65E-7        | 2.37E-5   | > 1.00E-4 |               |  |
| SW-620                          | 0.281     | 1.291 | 0.919                                 | 0.723 | 0.652 | 0.580 | 0.431 | 63   | 44   | 37   | 30   | 15   | 4.76E-8        | > 1.00E-4 | > 1.00E-4 |               |  |
| CNS Cancer                      |           |       |                                       |       |       |       |       |      |      |      |      |      |                |           |           |               |  |
| SF-268                          | 0.190     | 0.669 | 0.699                                 | 0.205 | 0.169 | 0.148 | 0.141 | 106  | 3    | -11  | -22  | -26  | 3.52E-8        | 1.66E-7   | > 1.00E-4 |               |  |
| SF-295                          | 0.430     | 1.390 | 1.335                                 | 0.691 | 0.345 | 0.235 | 0.318 | 94   | 27   | -20  | -45  | -26  | 4.57E-8        | 3.81E-7   | > 1.00E-4 |               |  |
| SF-539                          | 0.209     | 0.660 | 0.647                                 | 0.151 | 0.093 | 0.083 | 0.110 | 97   | -28  | -56  | -60  | -47  | 2.38E-8        | 5.97E-8   | .         |               |  |
| SNB-19                          | 0.914     | 1.441 | 1.431                                 | 0.512 | 0.276 | 0.299 | 0.376 | 98   | -44  | -70  | -67  | -59  | 2.18E-8        | 4.90E-8   | 1.71E-7   |               |  |
| SNB-75                          | 0.340     | 0.695 | 0.601                                 | 0.312 | 0.222 | 0.131 | 0.192 | 74   | -8   | -35  | -62  | -44  | 1.94E-8        | 7.93E-8   | .         |               |  |
| U251                            | 0.642     | 2.465 | 2.097                                 | 1.461 | 0.764 | 0.758 | 0.634 | 80   | 45   | 7    | 6    | -1   | 7.14E-8        | 6.73E-5   | > 1.00E-4 |               |  |
| Melanoma                        |           |       |                                       |       |       |       |       |      |      |      |      |      |                |           |           |               |  |
| LOX IMVI                        | 0.124     | 0.922 | 0.265                                 | 0.104 | 0.091 | 0.073 | 0.069 | 18   | -16  | -27  | -41  | -44  | < 1.00E-8      | 3.33E-8   | > 1.00E-4 |               |  |
| M14                             | 0.165     | 0.796 | 0.681                                 | 0.354 | 0.254 | 0.233 | 0.169 | 82   | 30   | 14   | 11   | 1    | 4.11E-8        | > 1.00E-4 | > 1.00E-4 |               |  |
| MDA-MB-435                      | 0.664     | 2.725 | 2.619                                 | 1.193 | 0.896 | 0.813 | 0.517 | 95   | 26   | 11   | 7    | -22  | 4.45E-8        | 1.77E-5   | > 1.00E-4 |               |  |
| SK-MEL-2                        | 0.318     | 0.692 | 0.626                                 | 0.426 | 0.309 | 0.130 | 0.162 | 82   | 29   | -3   | -59  | -49  | 4.03E-8        | 8.15E-7   | .         |               |  |
| SK-MEL-28                       | 0.592     | 1.848 | 1.787                                 | 0.771 | 0.734 | 0.847 | 0.572 | 95   | 14   | 11   | 20   | -3   | 3.61E-8        | 7.15E-5   | > 1.00E-4 |               |  |
| UACC-257                        | 0.710     | 1.932 | 1.938                                 | 1.633 | 1.059 | 1.016 | 0.630 | 100  | 75   | 29   | 25   | -11  | 3.49E-7        | 4.88E-5   | > 1.00E-4 |               |  |
| UACC-62                         | 0.680     | 1.705 | 1.691                                 | 1.003 | 0.866 | 0.738 | 0.447 | 99   | 31   | 18   | 6    | -34  | 5.30E-8        | 1.39E-5   | > 1.00E-4 |               |  |
| Ovarian Cancer                  |           |       |                                       |       |       |       |       |      |      |      |      |      |                |           |           |               |  |
| IGROV1                          | 0.276     | 0.788 | 0.643                                 | 0.157 | 0.163 | 0.175 | 0.191 | 72   | -43  | -41  | -37  | -31  | 1.54E-8        | 4.21E-8   | > 1.00E-4 |               |  |
| OVCAR-3                         | 0.498     | 1.488 | 1.421                                 | 0.730 | 0.469 | 0.252 | 0.389 | 93   | 23   | -6   | -49  | -22  | 4.17E-8        | 6.37E-7   | > 1.00E-4 |               |  |
| OVCAR-4                         | 0.238     | 1.162 | 1.108                                 | 0.875 | 0.510 | 0.237 | 0.224 | 94   | 69   | 29   | .    | -6   | 3.01E-7        | 9.68E-6   | > 1.00E-4 |               |  |
| OVCAR-5                         | 0.292     | 0.831 | 0.860                                 | 0.577 | 0.472 | 0.449 | 0.460 | 105  | 53   | 33   | 29   | 31   | 1.42E-7        | > 1.00E-4 | > 1.00E-4 |               |  |
| OVCAR-8                         | 0.233     | 0.962 | 0.968                                 | 0.273 | 0.096 | 0.017 | 0.091 | 101  | 5    | -59  | -93  | -61  | 3.41E-8        | 1.22E-7   | 7.25E-7   |               |  |
| NCI/ADR-RES                     | 0.236     | 0.643 | 0.568                                 | 0.417 | 0.310 | 0.139 | 0.126 | 82   | 44   | 18   | -41  | -47  | 7.06E-8        | 2.02E-6   | > 1.00E-4 |               |  |
| Renal Cancer                    |           |       |                                       |       |       |       |       |      |      |      |      |      |                |           |           |               |  |
| 786-0                           | 0.099     | 0.976 | 0.947                                 | 0.160 | 0.108 | 0.082 | 0.052 | 97   | 7    | 1    | -17  | -48  | 3.31E-8        | 1.13E-6   | > 1.00E-4 |               |  |
| A498                            | 0.231     | 1.159 | 1.102                                 | 0.306 | 0.297 | 0.400 | 0.374 | 94   | 8    | 7    | 18   | 15   | 3.25E-8        | > 1.00E-4 | > 1.00E-4 |               |  |
| ACHN                            | 0.266     | 0.620 | 0.405                                 | 0.178 | 0.140 | 0.179 | 0.171 | 39   | -33  | -48  | -33  | -36  | < 1.00E-8      | 3.48E-8   | > 1.00E-4 |               |  |
| CAKI-1                          | 0.164     | 0.431 | 0.412                                 | 0.078 | 0.056 | 0.070 | 0.126 | 93   | -52  | -66  | -57  | -23  | 1.98E-8        | 4.36E-8   | .         |               |  |
| RXF 393                         | 0.272     | 1.300 | 1.309                                 | 0.815 | 0.318 | 0.395 | 0.310 | 101  | 53   | 4    | 12   | 4    | 1.14E-7        | > 1.00E-4 | > 1.00E-4 |               |  |
| TK-10                           | 0.336     | 1.033 | 0.952                                 | 0.382 | 0.262 | 0.251 | 0.394 | 88   | 7    | -22  | -25  | 8    | 2.95E-8        | .         | > 1.00E-4 |               |  |
| UO-31                           | 0.691     | 1.214 | 1.188                                 | 0.958 | 0.284 | 0.247 | 0.384 | 95   | 51   | -59  | -64  | -44  | 1.02E-7        | 2.91E-7   | .         |               |  |
| Prostate Cancer                 |           |       |                                       |       |       |       |       |      |      |      |      |      |                |           |           |               |  |
| DU-145                          | 0.147     | 0.542 | 0.499                                 | 0.202 | 0.137 | 0.175 | 0.175 | 89   | 14   | -7   | 7    | 7    | 3.31E-8        | .         | > 1.00E-4 |               |  |
| Breast Cancer                   |           |       |                                       |       |       |       |       |      |      |      |      |      |                |           |           |               |  |
| MCF7                            | 0.222     | 1.405 | 1.410                                 | 0.906 | 0.615 | 0.395 | 0.271 | 100  | 58   | 33   | 15   | 4    | 2.08E-7        | > 1.00E-4 | > 1.00E-4 |               |  |
| MDA-MB-231/ATCC                 | 0.185     | 0.411 | 0.360                                 | 0.111 | 0.085 | 0.098 | 0.119 | 78   | -40  | -54  | -47  | -36  | 1.71E-8        | 4.55E-8   | .         |               |  |
| HS 578T                         | 0.337     | 0.617 | 0.729                                 | 0.344 | 0.280 | 0.268 | 0.306 | 140  | 2    | -17  | -21  | -9   | 4.51E-8        | 1.34E-7   | > 1.00E-4 |               |  |
| MDA-N                           | 0.125     | 0.533 | 0.448                                 | 0.201 | 0.160 | 0.112 | 0.096 | .    | 19   | 9    | -10  | -24  | .              | 2.83E-6   | > 1.00E-4 |               |  |
| T-47D                           | 0.257     | 0.479 | 0.462                                 | 0.338 | 0.174 | 0.192 | 0.263 | 92   | 37   | -32  | -25  | 3    | 5.74E-8        | .         | > 1.00E-4 |               |  |

Table S2. NCI 60-cell line results for 4.

National Cancer Institute Developmental Therapeutics Program  
In-Vitro Testing Results

| NSC : D - 751841 / 1            |           |       | Experiment ID : 0912NS69              |       |       |       |       |      |      |      |      |      | Test Type : 08 |           | Units : Molar |  |
|---------------------------------|-----------|-------|---------------------------------------|-------|-------|-------|-------|------|------|------|------|------|----------------|-----------|---------------|--|
| Report Date : February 01, 2010 |           |       | Test Date : December 14, 2009         |       |       |       |       |      |      |      |      |      | QNS :          |           | MC :          |  |
| COMI : PC 1011 (92204)          |           |       | Stain Reagent : SRB Dual-Pass Related |       |       |       |       |      |      |      |      |      | SSPL : K24A    |           |               |  |
| Log10 Concentration             |           |       |                                       |       |       |       |       |      |      |      |      |      |                |           |               |  |
| Panel/Cell Line                 | Time Zero | Ctrl  | -9.3                                  | -8.3  | -7.3  | -6.3  | -5.3  | -9.3 | -8.3 | -7.3 | -6.3 | -5.3 | GI50           | TGI       | LC50          |  |
| Leukemia                        |           |       |                                       |       |       |       |       |      |      |      |      |      |                |           |               |  |
| CCRF-CEM                        | 0.349     | 1.687 | 1.632                                 | 1.581 | 0.653 | 0.568 | 0.545 | 96   | 92   | 23   | 16   | 15   | 2.12E-8        | > 5.25E-6 | > 5.25E-6     |  |
| HL-60(TB)                       | 0.717     | 2.144 | 1.917                                 | 1.891 | 0.908 | 0.556 | 0.523 | 84   | 82   | 13   | -22  | -27  | 1.54E-8        | 1.24E-7   | > 5.25E-6     |  |
| K-562                           | 0.257     | 1.248 | 1.197                                 | 1.037 | 0.880 | 0.697 | 0.424 | 95   | 79   | 63   | 44   | 17   | 2.62E-7        | > 5.25E-6 | > 5.25E-6     |  |
| MOLT-4                          | 0.598     | 1.648 | 1.770                                 | 1.625 | 1.258 | 0.860 | 0.657 | 112  | 98   | 63   | 25   | 6    | 1.14E-7        | > 5.25E-6 | > 5.25E-6     |  |
| RPMI-8226                       | 0.685     | 2.195 | 2.215                                 | 2.174 | 1.003 | 0.866 | 0.740 | 101  | 99   | 21   | 12   | 4    | 2.22E-8        | > 5.25E-6 | > 5.25E-6     |  |
| Non-Small Cell Lung Cancer      |           |       |                                       |       |       |       |       |      |      |      |      |      |                |           |               |  |
| A549/ATCC                       | 0.353     | 1.013 | 0.996                                 | 0.880 | 0.276 | 0.216 | 0.231 | 97   | 80   | -22  | -39  | -35  | 1.03E-8        | 3.20E-8   | > 5.25E-6     |  |
| EKVX                            | 0.633     | 1.534 | 1.609                                 | 1.556 | 0.671 | 0.619 | 0.459 | 108  | 102  | 4    | -2   | -27  | 1.79E-8        | 2.38E-7   | > 5.25E-6     |  |
| HOP-62                          | 0.259     | 0.851 | 0.872                                 | 0.868 | 0.290 | 0.202 | 0.150 | 104  | 103  | 5    | -22  | -42  | 1.83E-8        | 8.10E-8   | > 5.25E-6     |  |
| HOP-92                          | 1.146     | 1.965 | 1.911                                 | 1.910 | 1.852 | 0.516 | 0.683 | 93   | 93   | 86   | -55  | -40  | 9.47E-8        | 2.14E-7   | > 5.25E-6     |  |
| NCI-H226                        | 0.670     | 1.492 | 1.451                                 | 1.369 | 0.958 | 0.705 | 0.600 | 95   | 85   | 35   | 4    | -11  | 2.63E-8        | 1.01E-6   | > 5.25E-6     |  |
| NCI-H23                         | 0.402     | 1.242 | 1.222                                 | 1.238 | 0.790 | 0.555 | 0.509 | 98   | 99   | 46   | 18   | 13   | 4.45E-8        | > 5.25E-6 | > 5.25E-6     |  |
| NCI-H322M                       | 0.461     | 0.773 | 0.785                                 | 0.762 | 0.544 | 0.465 | 0.388 | 104  | 96   | 26   | 1    | -16  | 2.42E-8        | 6.24E-7   | > 5.25E-6     |  |
| NCI-H460                        | 0.241     | 1.967 | 1.892                                 | 1.638 | 0.550 | 0.500 | 0.376 | 96   | 81   | 18   | 15   | 8    | 1.62E-8        | > 5.25E-6 | > 5.25E-6     |  |
| NCI-H522                        | 0.593     | 1.451 | 1.383                                 | 1.294 | 0.919 | 0.504 | 0.573 | 92   | 82   | 38   | -15  | -3   | 2.78E-8        | 2.73E-7   | > 5.25E-6     |  |
| Colon Cancer                    |           |       |                                       |       |       |       |       |      |      |      |      |      |                |           |               |  |
| COLO 205                        | 0.195     | 1.194 | 1.211                                 | 1.082 | 0.432 | 0.251 | 0.172 | 102  | 89   | 24   | 6    | -12  | 2.07E-8        | 1.09E-6   | > 5.25E-6     |  |
| HCC-2998                        | 0.747     | 1.776 | 1.669                                 | 1.594 | 0.525 | 0.483 | 0.155 | 90   | 82   | -30  | -35  | -79  | 1.02E-8        | 2.85E-8   | 1.13E-6       |  |
| HCT-116                         | 0.239     | 1.641 | 1.589                                 | 1.467 | 0.570 | 0.417 | 0.296 | 96   | 88   | 24   | 13   | 4    | 2.03E-8        | > 5.25E-6 | > 5.25E-6     |  |
| HCT-15                          | 0.243     | 1.705 | 1.562                                 | 1.618 | 1.362 | 0.824 | 0.450 | 90   | 94   | 77   | 40   | 14   | 2.76E-7        | > 5.25E-6 | > 5.25E-6     |  |
| HT29                            | 0.153     | 0.816 | 0.807                                 | 0.627 | 0.175 | 0.132 | 0.149 | 99   | 71   | 3    | -14  | -3   | 1.08E-8        | 8.08E-8   | > 5.25E-6     |  |
| KM12                            | 0.247     | 1.314 | 1.301                                 | 1.162 | 0.775 | 0.576 | 0.396 | 99   | 86   | 49   | 31   | 14   | 5.08E-8        | > 5.25E-6 | > 5.25E-6     |  |
| SW-620                          | 0.205     | 1.161 | 1.106                                 | 0.972 | 0.448 | 0.340 | 0.310 | 94   | 80   | 25   | 14   | 11   | 1.87E-8        | > 5.25E-6 | > 5.25E-6     |  |
| CNS Cancer                      |           |       |                                       |       |       |       |       |      |      |      |      |      |                |           |               |  |
| SF-268                          | 0.389     | 1.202 | 1.177                                 | 1.120 | 0.304 | 0.179 | 0.208 | 97   | 90   | -22  | -54  | -47  | 1.20E-8        | 3.35E-8   |               |  |
| SF-295                          | 0.751     | 1.161 | 1.171                                 | 1.065 | 0.463 | 0.355 | 0.301 | 102  | 77   | -38  | -53  | -60  | 8.93E-9        | 2.43E-8   | 3.36E-7       |  |
| SF-539                          | 0.602     | 1.989 | 1.936                                 | 1.869 | 1.239 | 0.520 | 0.461 | 96   | 91   | 46   | -14  | -24  | 4.27E-8        | 3.09E-7   | > 5.25E-6     |  |
| SNB-19                          | 0.492     | 1.597 | 1.498                                 | 1.515 | 0.994 | 0.716 | 0.507 | 91   | 93   | 45   | 20   | 1    | 4.20E-8        | > 5.25E-6 | > 5.25E-6     |  |
| SNB-75                          | 0.519     | 1.019 | 0.957                                 | 0.868 | 0.081 | 0.038 | 0.039 | 88   | 70   | -84  | -93  | -93  | 7.05E-9        | 1.49E-8   | 3.14E-8       |  |
| U251                            | 0.273     | 1.137 | 1.042                                 | 1.017 | 0.219 | 0.168 | 0.192 | 89   | 86   | -20  | -39  | -30  | 1.15E-8        | 3.41E-8   | > 5.25E-6     |  |
| Melanoma                        |           |       |                                       |       |       |       |       |      |      |      |      |      |                |           |               |  |
| LOX IMVI                        | 0.105     | 0.609 | 0.596                                 | 0.281 | 0.091 | 0.067 | 0.031 | 97   | 35   | -13  | -37  | -71  | 3.01E-9        | 2.78E-8   | 1.29E-6       |  |
| MALME-3M                        | 0.844     | 1.401 | 1.328                                 | 1.157 | 0.757 | 0.654 | 0.611 | 87   | 56   | -10  | -23  | -28  | 6.52E-9        | 3.68E-8   | > 5.25E-6     |  |
| M14                             | 0.297     | 0.951 | 0.933                                 | 0.883 | 0.435 | 0.254 | 0.197 | 97   | 90   | 21   | -15  | -34  | 1.98E-8        | 2.04E-7   | > 5.25E-6     |  |
| MDA-MB-435                      | 0.349     | 1.178 | 1.165                                 | 1.142 | 0.562 | 0.430 | 0.358 | 98   | 96   | 26   | 10   | 1    | 2.36E-8        | > 5.25E-6 | > 5.25E-6     |  |
| SK-MEL-2                        | 0.714     | 1.526 | 1.552                                 | 1.469 | 0.585 | 0.408 | 0.265 | 103  | 93   | -18  | -43  | -63  | 1.28E-8        | 3.61E-8   | 1.19E-6       |  |
| SK-MEL-28                       | 0.451     | 1.277 | 1.270                                 | 1.217 | 0.432 | 0.178 | 0.266 | 99   | 93   | -4   | -61  | -41  | 1.45E-8        | 4.74E-8   |               |  |
| SK-MEL-5                        | 0.409     | 2.186 | 2.156                                 | 2.059 | 1.167 | 0.318 | 0.228 | 98   | 93   | 43   | -22  | -44  | 3.74E-8        | 2.38E-7   | > 5.25E-6     |  |
| UACC-257                        | 0.559     | 0.895 | 0.824                                 | 0.847 | 0.415 | 0.320 | 0.320 | 79   | 86   | -26  | -43  | -43  | 1.09E-8        | 3.08E-8   | > 5.25E-6     |  |
| UACC-62                         | 0.662     | 2.016 | 1.942                                 | 1.771 | 1.217 | 0.988 | 0.719 | 95   | 82   | 41   | 24   | 4    | 3.16E-8        | > 5.25E-6 | > 5.25E-6     |  |
| Ovarian Cancer                  |           |       |                                       |       |       |       |       |      |      |      |      |      |                |           |               |  |
| IGROV1                          | 0.479     | 0.809 | 0.858                                 | 0.745 | 0.149 | 0.216 | 0.150 | 115  | 81   | -69  | -55  | -69  | 8.41E-9        | 1.82E-8   | 3.92E-8       |  |
| OVCAR-3                         | 0.536     | 1.382 | 1.357                                 | 1.331 | 0.425 | 0.244 | 0.179 | 97   | 94   | -21  | -54  | -67  | 1.27E-8        | 3.46E-8   | 3.87E-7       |  |
| OVCAR-5                         | 0.488     | 1.177 | 1.150                                 | 1.127 | 0.855 | 0.646 | 0.590 | 96   | 93   | 53   | 23   | 15   | 6.71E-8        | > 5.25E-6 | > 5.25E-6     |  |
| OVCAR-8                         | 0.228     | 0.678 | 0.677                                 | 0.695 | 0.395 | 0.271 | 0.112 | 100  | 104  | 37   | 9    | -51  | 3.37E-8        | 7.52E-7   | 5.04E-6       |  |
| NCI/ADR-RES                     | 0.283     | 0.928 | 0.917                                 | 0.891 | 0.726 | 0.462 | 0.257 | 98   | 94   | 69   | 28   | -9   | 1.50E-7        | 2.93E-6   | > 5.25E-6     |  |
| SK-OV-3                         | 0.460     | 1.016 | 1.043                                 | 0.979 | 0.446 | 0.308 | 0.274 | 105  | 93   | -3   | -33  | -40  | 1.48E-8        | 4.88E-8   | > 5.25E-6     |  |
| Renal Cancer                    |           |       |                                       |       |       |       |       |      |      |      |      |      |                |           |               |  |
| 786-0                           | 0.387     | 1.400 | 1.362                                 | 1.292 | 0.260 | 0.171 | 0.146 | 96   | 89   | -33  | -56  | -62  | 1.10E-8        | 2.83E-8   | 2.93E-7       |  |
| A498                            | 0.736     | 1.773 | 1.365                                 | 1.179 | 0.253 | 0.121 | 0.184 | 61   | 43   | -66  | -84  | -75  | 2.06E-9        | 1.30E-8   | 3.77E-8       |  |
| ACHN                            | 0.348     | 1.575 | 1.558                                 | 1.494 | 0.582 | 0.392 | 0.427 | 99   | 93   | 19   | 4    | 6    | 2.01E-8        | > 5.25E-6 | > 5.25E-6     |  |
| CAKI-1                          | 0.678     | 0.962 | 0.950                                 | 1.005 | 0.226 | 0.108 | 0.170 | 96   | 115  | -67  | -84  | -75  | 1.20E-8        | 2.25E-8   | 4.25E-8       |  |
| RXF 393                         | 0.649     | 1.194 | 1.166                                 | 1.151 | 0.384 | 0.298 | 0.140 | 95   | 92   | -41  | -54  | -78  | 1.09E-8        | 2.59E-8   | 2.56E-7       |  |
| SN12C                           | 0.519     | 1.891 | 1.839                                 | 1.620 | 1.235 | 0.778 | 0.664 | 96   | 80   | 52   | 19   | 11   | 6.10E-8        | > 5.25E-6 | > 5.25E-6     |  |
| TK-10                           | 0.374     | 1.332 | 1.259                                 | 1.227 | 0.692 | 0.306 | 0.322 | 92   | 89   | 33   | -18  | -14  | 2.62E-8        | 2.32E-7   | > 5.25E-6     |  |
| UO-31                           | 0.569     | 1.136 | 1.085                                 | 1.033 | 0.171 | 0.160 | 0.160 | 91   | 82   |      | -70  | -72  | 1.38E-8        | 6.29E-8   | 2.87E-7       |  |
| Prostate Cancer                 |           |       |                                       |       |       |       |       |      |      |      |      |      |                |           |               |  |
| PC-3                            | 0.397     | 1.634 | 1.602                                 | 1.577 | 1.286 | 0.663 | 0.478 | 97   | 95   | 72   | 21   | 7    | 1.42E-7        | > 5.25E-6 | > 5.25E-6     |  |
| DU-145                          | 0.309     | 1.125 | 1.145                                 | 1.038 | 0.438 | 0.341 | 0.270 | 102  | 89   | 16   | 4    | -13  | 1.80E-8        | 9.06E-7   | > 5.25E-6     |  |
| Breast Cancer                   |           |       |                                       |       |       |       |       |      |      |      |      |      |                |           |               |  |
| MCF7                            | 0.204     | 0.894 | 0.848                                 | 0.731 | 0.317 | 0.268 | 0.182 | 93   | 76   | 16   | 9    | -11  | 1.44E-8        | 1.50E-6   | > 5.25E-6     |  |
| MDA-MB-231/ATCC                 | 0.449     | 1.123 | 1.123                                 | 1.032 | 0.652 | 0.544 | 0.450 | 100  | 86   | 30   | 14   |      | 2.33E-8        | > 5.25E-6 | > 5.25E-6     |  |
| HS 578T                         | 0.514     | 1.222 | 1.103                                 | 1.114 | 0.505 | 0.461 | 0.403 | 83   | 85   | -2   | -10  | -22  | 1.32E-8        | 5.01E-8   | > 5.25E-6     |  |
| BT-549                          | 0.792     | 1.348 | 1.350                                 | 1.245 | 0.183 | 0.079 | 0.061 | 100  | 82   | -77  | -90  | -92  | 8.30E-9        | 1.72E-8   | 3.55E-8       |  |
| T-47D                           | 0.443     | 1.111 | 1.068                                 | 1.092 | 0.784 | 0.568 | 0.485 | 94   | 97   | 51   | 19   | 6    | 5.65E-8        | > 5.25E-6 | > 5.25E-6     |  |
| MDA-MB-468                      | 0.536     | 1.400 | 1.379                                 | 1.244 | 0.300 | 0.233 | 0.206 | 98   | 82   | -44  | -57  | -62  | 9.42E-9        | 2.35E-8   | 1.58E-7       |  |

Table S3. NCI 60-cell line results for 5.

National Cancer Institute Developmental Therapeutics Program  
In-Vitro Testing Results

| NSC : D - 751842 / 1            |           |       | Experiment ID : 0912NS69              |       |       |       |       | Test Type : 08 |      |      |      |      | Units : Molar |           |           |
|---------------------------------|-----------|-------|---------------------------------------|-------|-------|-------|-------|----------------|------|------|------|------|---------------|-----------|-----------|
| Report Date : February 01, 2010 |           |       | Test Date : December 14, 2009         |       |       |       |       | QNS :          |      |      |      |      | MC :          |           |           |
| COMI : PC 1010 (92205)          |           |       | Stain Reagent : SRB Dual-Pass Related |       |       |       |       | SSPL : K24A    |      |      |      |      |               |           |           |
| Log10 Concentration             |           |       |                                       |       |       |       |       |                |      |      |      |      |               |           |           |
| Panel/Cell Line                 | Time Zero | Ctrl  | Mean Optical Densities                |       |       |       |       | Percent Growth |      |      |      |      | GI50          | TGI       | LC50      |
|                                 |           |       | -8.7                                  | -7.7  | -6.7  | -5.7  | -4.7  | -8.7           | -7.7 | -6.7 | -5.7 | -4.7 |               |           |           |
| Leukemia                        |           |       |                                       |       |       |       |       |                |      |      |      |      |               |           |           |
| CCRF-CEM                        | 0.349     | 1.687 | 1.546                                 | 1.580 | 0.674 | 0.612 | 0.544 | 89             | 92   | 24   | 20   | 15   | 7.51E-8       | > 1.80E-5 | > 1.80E-5 |
| HL-60(TB)                       | 0.717     | 2.144 | 2.104                                 | 2.198 | 1.378 | 0.542 | 0.611 | 97             | 104  | 46   | -24  | -15  | 1.55E-7       | 8.12E-7   | > 1.80E-5 |
| K-562                           | 0.257     | 1.248 | 1.105                                 | 1.090 | 0.913 | 0.724 | 0.280 | 86             | 84   | 66   | 47   | 2    | 1.27E-6       | > 1.80E-5 | > 1.80E-5 |
| MOLT-4                          | 0.598     | 1.648 | 1.652                                 | 1.659 | 1.262 | 0.863 | 0.542 | 100            | 101  | 63   | 25   | -9   | 4.01E-7       | 9.64E-6   | > 1.80E-5 |
| RPMI-8226                       | 0.685     | 2.195 | 2.182                                 | 2.067 | 1.284 | 0.927 | 0.700 | 99             | 92   | 40   | 16   | 1    | 1.14E-7       | > 1.80E-5 | > 1.80E-5 |
| Non-Small Cell Lung Cancer      |           |       |                                       |       |       |       |       |                |      |      |      |      |               |           |           |
| A549/ATCC                       | 0.353     | 1.013 | 1.000                                 | 0.967 | 0.286 | 0.266 | 0.179 | 98             | 93   | -19  | -25  | -49  | 4.36E-8       | 1.22E-7   | > 1.80E-5 |
| EKVX                            | 0.633     | 1.534 | 1.429                                 | 1.428 | 1.191 | 0.618 | 0.582 | 88             | 88   | 62   | -2   | -8   | 2.76E-7       | 1.65E-6   | > 1.80E-5 |
| HOP-62                          | 0.259     | 0.851 | 0.864                                 | 0.878 | 0.435 | 0.251 | 0.221 | 102            | 105  | 30   | -3   | -15  | 9.65E-8       | 1.43E-6   | > 1.80E-5 |
| HOP-92                          | 1.146     | 1.965 | 1.911                                 | 1.803 | 1.928 | 0.636 | 0.919 | 93             | 80   | 95   | -45  | -20  | 3.80E-7       | 8.65E-7   | > 1.80E-5 |
| NCI-H226                        | 0.670     | 1.492 | 1.380                                 | 1.487 | 1.230 | 0.754 | 0.601 | 86             | 99   | 68   | 10   | -10  | 3.70E-7       | 5.62E-6   | > 1.80E-5 |
| NCI-H23                         | 0.402     | 1.242 | 1.235                                 | 1.205 | 0.986 | 0.642 | 0.542 | 99             | 96   | 69   | 29   | 17   | 5.38E-7       | > 1.80E-5 | > 1.80E-5 |
| NCI-H322M                       | 0.461     | 0.773 | 0.734                                 | 0.772 | 0.584 | 0.462 | 0.423 | 87             | 100  | 39   | .    | -8   | 1.20E-7       | 1.96E-6   | > 1.80E-5 |
| NCI-H460                        | 0.241     | 1.967 | 1.934                                 | 1.883 | 0.526 | 0.487 | 0.212 | 98             | 95   | 17   | 14   | -12  | 6.75E-8       | 6.27E-6   | > 1.80E-5 |
| NCI-H522                        | 0.593     | 1.451 | 1.405                                 | 1.439 | 1.342 | 0.735 | 0.371 | 95             | 99   | 87   | 16   | -38  | 6.06E-7       | 3.64E-6   | > 1.80E-5 |
| Colon Cancer                    |           |       |                                       |       |       |       |       |                |      |      |      |      |               |           |           |
| COLO 205                        | 0.195     | 1.194 | 1.251                                 | 1.086 | 0.465 | 0.241 | 0.294 | 106            | 89   | 27   | 5    | 10   | 7.69E-8       | > 1.80E-5 | > 1.80E-5 |
| HCC-2998                        | 0.747     | 1.776 | 1.674                                 | 1.639 | 0.660 | 0.729 | 0.114 | 90             | 87   | -12  | -2   | -85  | 4.25E-8       | 1.37E-7   | 6.81E-6   |
| HCT-116                         | 0.239     | 1.641 | 1.550                                 | 1.605 | 0.776 | 0.477 | 0.114 | 93             | 97   | 38   | 17   | -52  | 1.14E-7       | 3.16E-6   | 1.67E-5   |
| HCT-15                          | 0.243     | 1.705 | 1.637                                 | 1.710 | 1.533 | 1.152 | 0.490 | 95             | 100  | 88   | 62   | 17   | 3.34E-6       | > 1.80E-5 | > 1.80E-5 |
| HT29                            | 0.153     | 0.816 | 0.787                                 | 0.764 | 0.211 | 0.198 | 0.123 | 96             | 92   | 9    | 7    | -20  | 5.75E-8       | 3.23E-6   | > 1.80E-5 |
| KM12                            | 0.247     | 1.314 | 1.243                                 | 1.280 | 0.769 | 0.698 | 0.291 | 93             | 97   | 49   | 42   | 4    | 1.71E-7       | > 1.80E-5 | > 1.80E-5 |
| SW-620                          | 0.205     | 1.161 | 1.116                                 | 1.140 | 0.554 | 0.387 | 0.261 | 95             | 98   | 36   | 19   | 6    | 1.08E-7       | > 1.80E-5 | > 1.80E-5 |
| CNS Cancer                      |           |       |                                       |       |       |       |       |                |      |      |      |      |               |           |           |
| SF-268                          | 0.389     | 1.202 | 1.147                                 | 1.221 | 0.733 | 0.237 | 0.233 | 93             | 102  | 42   | -39  | -40  | 1.34E-7       | 5.95E-7   | > 1.80E-5 |
| SF-295                          | 0.751     | 1.161 | 1.158                                 | 1.213 | 0.572 | 0.436 | 0.269 | 99             | 112  | -24  | -42  | -64  | 5.17E-8       | 1.20E-7   | 4.13E-6   |
| SF-539                          | 0.602     | 1.989 | 1.950                                 | 1.841 | 1.626 | 0.701 | 0.416 | 97             | 89   | 74   | 7    | -31  | 4.10E-7       | 2.77E-6   | > 1.80E-5 |
| SNB-19                          | 0.492     | 1.597 | 1.463                                 | 1.504 | 1.239 | 0.785 | 0.524 | 88             | 92   | 68   | 26   | 3    | 4.82E-7       | > 1.80E-5 | > 1.80E-5 |
| SNB-75                          | 0.519     | 1.019 | 0.920                                 | 0.977 | 0.844 | 0.066 | 0.095 | 80             | 92   | 65   | -87  | -82  | 2.26E-7       | 4.81E-7   | 1.02E-6   |
| U251                            | 0.273     | 1.137 | 1.125                                 | 0.991 | 0.318 | 0.218 | 0.187 | 99             | 83   | 5    | -20  | -32  | 4.79E-8       | 2.88E-7   | > 1.80E-5 |
| Melanoma                        |           |       |                                       |       |       |       |       |                |      |      |      |      |               |           |           |
| LOX IMVI                        | 0.105     | 0.609 | 0.564                                 | 0.502 | 0.080 | 0.086 | 0.049 | 91             | 79   | -24  | -18  | -54  | 3.43E-8       | 1.05E-7   | 1.41E-5   |
| MALME-3M                        | 0.844     | 1.401 | 1.241                                 | 1.371 | 1.197 | 0.641 | 0.648 | 71             | 95   | 63   | -24  | -23  | 2.56E-7       | 9.56E-7   | > 1.80E-5 |
| M14                             | 0.297     | 0.951 | 0.919                                 | 0.957 | 0.494 | 0.389 | 0.090 | 95             | 101  | 30   | 14   | -70  | 9.40E-8       | 2.65E-6   | 1.04E-5   |
| MDA-MB-435                      | 0.349     | 1.178 | 1.113                                 | 1.110 | 0.655 | 0.540 | 0.204 | 92             | 92   | 37   | 23   | -42  | 1.04E-7       | 4.09E-6   | > 1.80E-5 |
| SK-MEL-2                        | 0.714     | 1.526 | 1.558                                 | 1.626 | 0.922 | 0.502 | 0.398 | 104            | 112  | 26   | -30  | -44  | 9.43E-8       | 5.22E-7   | > 1.80E-5 |
| SK-MEL-28                       | 0.451     | 1.277 | 1.196                                 | 1.301 | 0.889 | 0.347 | 0.285 | 90             | 103  | 53   | -23  | -37  | 1.97E-7       | 8.93E-7   | > 1.80E-5 |
| SK-MEL-5                        | 0.409     | 2.186 | 2.121                                 | 2.128 | 1.643 | 0.561 | 0.293 | 96             | 97   | 69   | 9    | -28  | 3.75E-7       | 3.07E-6   | > 1.80E-5 |
| UACC-257                        | 0.559     | 0.895 | 0.880                                 | 0.872 | 0.514 | 0.422 | 0.356 | 95             | 93   | -8   | -25  | -36  | 4.79E-8       | 1.50E-7   | > 1.80E-5 |
| UACC-62                         | 0.662     | 2.016 | 1.850                                 | 1.925 | 1.589 | 1.153 | 0.771 | 88             | 93   | 68   | 36   | 8    | 6.73E-7       | > 1.80E-5 | > 1.80E-5 |
| Ovarian Cancer                  |           |       |                                       |       |       |       |       |                |      |      |      |      |               |           |           |
| IGROV1                          | 0.479     | 0.809 | 0.804                                 | 0.707 | 0.160 | 0.192 | 0.219 | 98             | 69   | -67  | -60  | -54  | 2.49E-8       | 5.81E-8   | 1.36E-7   |
| OVCAR-3                         | 0.536     | 1.382 | 1.361                                 | 1.387 | 0.957 | 0.351 | 0.364 | 97             | 101  | 50   | -35  | -32  | 1.78E-7       | 7.00E-7   | > 1.80E-5 |
| OVCAR-5                         | 0.488     | 1.177 | 1.111                                 | 1.159 | 1.054 | 0.742 | 0.649 | 90             | 97   | 82   | 37   | 23   | 9.22E-7       | > 1.80E-5 | > 1.80E-5 |
| OVCAR-8                         | 0.228     | 0.678 | 0.691                                 | 0.683 | 0.474 | 0.309 | 0.165 | 103            | 101  | 55   | 18   | -28  | 2.41E-7       | 4.45E-6   | > 1.80E-5 |
| NCI/ADR-RES                     | 0.283     | 0.928 | 0.906                                 | 0.878 | 0.855 | 0.691 | 0.450 | 97             | 92   | 89   | 63   | 26   | 4.06E-6       | > 1.80E-5 | > 1.80E-5 |
| SK-OV-3                         | 0.460     | 1.016 | 1.033                                 | 1.027 | 0.882 | 0.427 | 0.428 | 103            | 102  | 76   | -7   | -7   | 3.68E-7       | 1.47E-6   | > 1.80E-5 |
| Renal Cancer                    |           |       |                                       |       |       |       |       |                |      |      |      |      |               |           |           |
| 786-0                           | 0.387     | 1.400 | 1.299                                 | 1.417 | 1.026 | 0.213 | 0.236 | 90             | 102  | 63   | -45  | -39  | 2.38E-7       | 6.89E-7   | > 1.80E-5 |
| A498                            | 0.736     | 1.773 | 1.532                                 | 1.553 | 1.360 | 0.137 | 0.209 | 77             | 79   | 60   | -81  | -72  | 2.12E-7       | 4.79E-7   | 1.08E-6   |
| ACHN                            | 0.348     | 1.575 | 1.554                                 | 1.477 | 1.200 | 0.550 | 0.419 | 98             | 92   | 69   | 16   | 6    | 4.19E-7       | > 1.80E-5 | > 1.80E-5 |
| CAKI-1                          | 0.678     | 0.962 | 0.895                                 | 0.805 | 0.616 | 0.130 | 0.195 | 76             | 45   | -9   | -81  | -71  | 1.22E-8       | 1.21E-7   | 6.68E-7   |
| RXF 393                         | 0.649     | 1.194 | 1.139                                 | 1.185 | 1.142 | 0.240 | 0.131 | 90             | 98   | 90   | -63  | -80  | 3.30E-7       | 6.99E-7   | 1.48E-6   |
| SN12C                           | 0.519     | 1.891 | 1.761                                 | 1.816 | 1.589 | 0.992 | 0.736 | 90             | 95   | 78   | 34   | 16   | 7.91E-7       | > 1.80E-5 | > 1.80E-5 |
| TK-10                           | 0.374     | 1.332 | 1.284                                 | 1.347 | 1.316 | 0.513 | 0.567 | 95             | 102  | 98   | 14   | 20   | 6.78E-7       | > 1.80E-5 | > 1.80E-5 |
| UO-31                           | 0.569     | 1.136 | 1.076                                 | 1.094 | 1.055 | 0.289 | 0.388 | 89             | 93   | 86   | -49  | -32  | 3.31E-7       | 7.77E-7   | > 1.80E-5 |
| Prostate Cancer                 |           |       |                                       |       |       |       |       |                |      |      |      |      |               |           |           |
| PC-3                            | 0.397     | 1.634 | 1.600                                 | 1.461 | 1.192 | 0.704 | 0.538 | 97             | 86   | 64   | 25   | 11   | 4.14E-7       | > 1.80E-5 | > 1.80E-5 |
| DU-145                          | 0.309     | 1.125 | 1.095                                 | 1.162 | 0.794 | 0.427 | 0.301 | 96             | 104  | 59   | 14   | -3   | 2.91E-7       | 1.27E-5   | > 1.80E-5 |
| Breast Cancer                   |           |       |                                       |       |       |       |       |                |      |      |      |      |               |           |           |
| MCF7                            | 0.204     | 0.894 | 0.786                                 | 0.865 | 0.357 | 0.335 | 0.127 | 84             | 96   | 22   | 19   | -38  | 7.53E-8       | 3.88E-6   | > 1.80E-5 |
| MDA-MB-231/ATCC                 | 0.449     | 1.123 | 1.055                                 | 1.115 | 0.828 | 0.583 | 0.537 | 90             | 99   | 56   | 20   | 13   | 2.67E-7       | > 1.80E-5 | > 1.80E-5 |
| HS 578T                         | 0.514     | 1.222 | 1.256                                 | 1.372 | 1.431 | 0.709 | 0.676 | 105            | 121  | 129  | 27   | 23   | 1.08E-6       | > 1.80E-5 | > 1.80E-5 |
| BT-549                          | 0.792     | 1.348 | 1.297                                 | 1.371 | 1.431 | 1.125 | 0.106 | 91             | 104  | 115  | -84  | -87  | 3.81E-7       | 6.80E-7   | 1.21E-6   |
| T-47D                           | 0.443     | 1.111 | 1.079                                 | 1.042 | 0.883 | 0.615 | 0.412 | 95             | 90   | 66   | 26   | -7   | 4.45E-7       | 1.09E-5   | > 1.80E-5 |
| MDA-MB-468                      | 0.536     | 1.400 | 1.316                                 | 1.338 | 0.457 | 0.267 | 0.179 | 90             | 93   | -15  | -50  | -67  | 4.50E-8       | 1.31E-7   | 1.77E-6   |

Table S4. NCI 60-cell line results for 6.

National Cancer Institute Developmental Therapeutics Program  
In-Vitro Testing Results

| NSC : D - 751843 / 1            |       |       |  | Experiment ID : 0912NS69              |       |       |       |       |                |      |      | Test Type : 08 |      |         |           | Units : Molar |  |  |
|---------------------------------|-------|-------|--|---------------------------------------|-------|-------|-------|-------|----------------|------|------|----------------|------|---------|-----------|---------------|--|--|
| Report Date : February 01, 2010 |       |       |  | Test Date : December 14, 2009         |       |       |       |       |                |      |      | QNS :          |      |         |           | MC :          |  |  |
| COMI : PC 1002 (92206)          |       |       |  | Stain Reagent : SRB Dual-Pass Related |       |       |       |       |                |      |      | SSPL : K24A    |      |         |           |               |  |  |
| Log10 Concentration             |       |       |  |                                       |       |       |       |       |                |      |      |                |      |         |           |               |  |  |
| Panel/Cell Line                 | Time  |       |  | Mean Optical Densities                |       |       |       |       | Percent Growth |      |      |                |      |         |           |               |  |  |
|                                 | Zero  | Ctrl  |  | -8.9                                  | -7.9  | -6.9  | -5.9  | -4.9  | -8.9           | -7.9 | -6.9 | -5.9           | -4.9 | GI50    | TGI       | LC50          |  |  |
| Leukemia                        |       |       |  |                                       |       |       |       |       |                |      |      |                |      |         |           |               |  |  |
| CCRF-CEM                        | 0.349 | 1.660 |  | 1.671                                 | 1.634 | 0.872 | 0.580 | 0.587 | 101            | 98   | 40   | 18             | 18   | 8.36E-8 | > 1.25E-5 | > 1.25E-5     |  |  |
| HL-60(TB)                       | 0.717 | 2.333 |  | 2.176                                 | 2.321 | 1.867 | 0.551 | 0.491 | 90             | 99   | 71   | -23            | -32  | 2.09E-7 | 7.09E-7   | > 1.25E-5     |  |  |
| K-562                           | 0.257 | 2.033 |  | 1.967                                 | 1.710 | 1.393 | 1.153 | 0.768 | 96             | 82   | 64   | 50             | 29   | 1.31E-6 | > 1.25E-5 | > 1.25E-5     |  |  |
| MOLT-4                          | 0.598 | 1.837 |  | 1.854                                 | 1.741 | 1.594 | 0.912 | 0.723 | 101            | 92   | 80   | 25             | 10   | 4.45E-7 | > 1.25E-5 | > 1.25E-5     |  |  |
| RPMI-8226                       | 0.685 | 2.203 |  | 2.246                                 | 2.215 | 1.162 | 0.853 | 0.753 | 103            | 101  | 31   | 11             | 4    | 6.75E-8 | > 1.25E-5 | > 1.25E-5     |  |  |
| Non-Small Cell Lung Cancer      |       |       |  |                                       |       |       |       |       |                |      |      |                |      |         |           |               |  |  |
| A549/ATCC                       | 0.353 | 1.345 |  | 1.292                                 | 1.295 | 0.529 | 0.281 | 0.245 | 95             | 95   | 18   | -21            | -31  | 4.77E-8 | 3.63E-7   | > 1.25E-5     |  |  |
| EKVX                            | 0.633 | 1.451 |  | 1.542                                 | 1.548 | 1.396 | 0.602 | 0.472 | 111            | 112  | 93   | -5             | -25  | 3.45E-7 | 1.11E-6   | > 1.25E-5     |  |  |
| HOP-62                          | 0.259 | 0.942 |  | 0.930                                 | 0.908 | 0.809 | 0.223 | 0.136 | 98             | 95   | 81   | -14            | -48  | 2.63E-7 | 8.91E-7   | > 1.25E-5     |  |  |
| HOP-92                          | 1.146 | 1.963 |  | 1.889                                 | 1.911 | 1.987 | 0.616 | 0.734 | 91             | 94   | 103  | -46            | -36  | 2.83E-7 | 6.12E-7   | > 1.25E-5     |  |  |
| NCI-H226                        | 0.670 | 1.472 |  | 1.425                                 | 1.369 | 1.169 | 0.717 | 0.580 | 94             | 87   | 62   | 6              | -14  | 2.06E-7 | 2.51E-6   | > 1.25E-5     |  |  |
| NCI-H23                         | 0.402 | 1.272 |  | 1.248                                 | 1.254 | 1.131 | 0.574 | 0.540 | 97             | 98   | 84   | 20             | 16   | 4.21E-7 | > 1.25E-5 | > 1.25E-5     |  |  |
| NCI-H322M                       | 0.461 | 0.745 |  | 0.787                                 | 0.748 | 0.673 | 0.451 | 0.387 | 115            | 101  | 75   | -2             | -16  | 2.61E-7 | 1.17E-6   | > 1.25E-5     |  |  |
| NCI-H460                        | 0.241 | 1.964 |  | 1.911                                 | 1.772 | 0.558 | 0.448 | 0.353 | 97             | 89   | 18   | 12             | 6    | 4.45E-8 | > 1.25E-5 | > 1.25E-5     |  |  |
| NCI-H522                        | 0.593 | 1.500 |  | 1.371                                 | 1.324 | 1.204 | 0.494 | 0.390 | 86             | 81   | 67   | -17            | -34  | 2.01E-7 | 7.91E-7   | > 1.25E-5     |  |  |
| Colon Cancer                    |       |       |  |                                       |       |       |       |       |                |      |      |                |      |         |           |               |  |  |
| COLO 205                        | 0.195 | 1.152 |  | 1.121                                 | 1.060 | 0.445 | 0.230 | 0.163 | 97             | 90   | 26   | 4              | -16  | 5.32E-8 | 1.90E-6   | > 1.25E-5     |  |  |
| HCC-2998                        | 0.747 | 1.867 |  | 1.845                                 | 1.754 | 1.157 | 0.471 | 0.229 | 98             | 90   | 37   | -37            | -69  | 7.01E-8 | 3.93E-7   | 3.15E-6       |  |  |
| HCT-116                         | 0.239 | 1.626 |  | 1.579                                 | 1.542 | 0.935 | 0.421 | 0.336 | 97             | 94   | 50   | 13             | 7    | 1.26E-7 | > 1.25E-5 | > 1.25E-5     |  |  |
| HCT-15                          | 0.243 | 1.832 |  | 1.728                                 | 1.733 | 1.709 | 1.284 | 0.818 | 93             | 94   | 92   | 65             | 36   | 4.22E-6 | > 1.25E-5 | > 1.25E-5     |  |  |
| HT29                            | 0.153 | 0.976 |  | 0.959                                 | 0.874 | 0.345 | 0.176 | 0.178 | 98             | 88   | 23   | 3              | 3    | 4.80E-8 | > 1.25E-5 | > 1.25E-5     |  |  |
| KM12                            | 0.247 | 1.384 |  | 1.297                                 | 1.203 | 0.842 | 0.509 | 0.395 | 92             | 84   | 52   | 23             | 13   | 1.50E-7 | > 1.25E-5 | > 1.25E-5     |  |  |
| SW-620                          | 0.205 | 1.102 |  | 1.109                                 | 1.029 | 0.582 | 0.372 | 0.352 | 101            | 92   | 42   | 19             | 16   | 8.63E-8 | > 1.25E-5 | > 1.25E-5     |  |  |
| CNS Cancer                      |       |       |  |                                       |       |       |       |       |                |      |      |                |      |         |           |               |  |  |
| SF-268                          | 0.389 | 1.349 |  | 1.266                                 | 1.179 | 1.063 | 0.255 | 0.198 | 91             | 82   | 70   | -34            | -49  | 1.95E-7 | 5.86E-7   | > 1.25E-5     |  |  |
| SF-295                          | 0.751 | 1.235 |  | 1.178                                 | 1.166 | 0.885 | 0.388 | 0.298 | 88             | 86   | 28   | -48            | -60  | 5.16E-8 | 2.89E-7   | 1.72E-6       |  |  |
| SF-539                          | 0.602 | 2.068 |  | 2.029                                 | 2.025 | 1.837 | 0.537 | 0.559 | 97             | 97   | 84   | -11            | -7   | 2.86E-7 | 9.60E-7   | > 1.25E-5     |  |  |
| SNB-19                          | 0.492 | 1.628 |  | 1.571                                 | 1.488 | 1.262 | 0.720 | 0.698 | 95             | 88   | 68   | 20             | 18   | 2.94E-7 | > 1.25E-5 | > 1.25E-5     |  |  |
| SNB-75                          | 0.519 | 1.029 |  | 0.958                                 | 0.845 | 0.806 | 0.049 | 0.045 | 86             | 64   | 56   | -91            | -91  | 1.38E-7 | 3.02E-7   | 6.61E-7       |  |  |
| U251                            | 0.273 | 1.633 |  | 1.542                                 | 1.538 | 0.688 | 0.218 | 0.186 | 93             | 93   | 31   | -20            | -32  | 6.09E-8 | 5.00E-7   | > 1.25E-5     |  |  |
| Melanoma                        |       |       |  |                                       |       |       |       |       |                |      |      |                |      |         |           |               |  |  |
| LOX IMVI                        | 0.105 | 0.570 |  | 0.530                                 | 0.443 | 0.102 | 0.060 | 0.071 | 91             | 73   | -3   | -43            | -32  | 2.49E-8 | 1.15E-7   | > 1.25E-5     |  |  |
| MALME-3M                        | 0.844 | 1.389 |  | 1.349                                 | 1.211 | 0.872 | 0.585 | 0.518 | 93             | 67   | 5    | -31            | -39  | 2.38E-8 | 1.74E-7   | > 1.25E-5     |  |  |
| M14                             | 0.297 | 0.989 |  | 1.013                                 | 0.970 | 0.569 | 0.322 | 0.231 | 103            | 97   | 39   | 4              | -22  | 8.15E-8 | 1.71E-6   | > 1.25E-5     |  |  |
| MDA-MB-435                      | 0.349 | 1.173 |  | 1.183                                 | 1.175 | 0.597 | 0.422 | 0.422 | 101            | 100  | 30   | 9              | 9    | 6.49E-8 | > 1.25E-5 | > 1.25E-5     |  |  |
| SK-MEL-2                        | 0.714 | 1.610 |  | 1.590                                 | 1.529 | 0.717 | 0.460 | 0.328 | 98             | 91   | -    | -36            | -54  | 3.53E-8 | 1.27E-7   | 7.47E-6       |  |  |
| SK-MEL-28                       | 0.451 | 1.231 |  | 1.243                                 | 1.170 | 0.490 | 0.173 | 0.201 | 101            | 92   | 5    | -62            | -55  | 3.80E-8 | 1.48E-7   | 8.36E-7       |  |  |
| SK-MEL-5                        | 0.409 | 2.175 |  | 2.160                                 | 2.036 | 1.338 | 0.340 | 0.220 | 99             | 92   | 53   | -17            | -46  | 1.36E-7 | 7.12E-7   | > 1.25E-5     |  |  |
| UACC-257                        | 0.559 | 0.993 |  | 0.976                                 | 1.007 | 0.606 | 0.336 | 0.296 | 96             | 103  | 11   | -40            | -47  | 4.71E-8 | 2.03E-7   | > 1.25E-5     |  |  |
| UACC-62                         | 0.662 | 2.014 |  | 1.950                                 | 1.792 | 1.309 | 1.007 | 0.924 | 95             | 84   | 48   | 26             | 19   | 1.09E-7 | > 1.25E-5 | > 1.25E-5     |  |  |
| Ovarian Cancer                  |       |       |  |                                       |       |       |       |       |                |      |      |                |      |         |           |               |  |  |
| IGROV1                          | 0.479 | 0.771 |  | 0.828                                 | 0.733 | 0.373 | 0.206 | 0.150 | 120            | 87   | -22  | -57            | -69  | 2.73E-8 | 7.84E-8   | 7.88E-7       |  |  |
| OVCAR-3                         | 0.536 | 1.427 |  | 1.472                                 | 1.317 | 1.056 | 0.246 | 0.116 | 105            | 88   | 58   | -54            | -78  | 1.48E-7 | 4.12E-7   | 1.15E-6       |  |  |
| OVCAR-5                         | 0.488 | 1.231 |  | 1.175                                 | 1.168 | 1.192 | 0.651 | 0.655 | 93             | 92   | 95   | 22             | 22   | 5.14E-7 | > 1.25E-5 | > 1.25E-5     |  |  |
| OVCAR-8                         | 0.228 | 1.041 |  | 1.044                                 | 1.078 | 0.924 | 0.323 | 0.220 | 100            | 105  | 86   | 12             | -4   | 3.79E-7 | 7.34E-6   | > 1.25E-5     |  |  |
| NCI/ADR-RES                     | 0.283 | 0.910 |  | 0.916                                 | 0.903 | 0.882 | 0.635 | 0.445 | 101            | 99   | 96   | 56             | 26   | 2.00E-6 | > 1.25E-5 | > 1.25E-5     |  |  |
| SK-OV-3                         | 0.460 | 1.125 |  | 1.210                                 | 1.327 | 0.602 | 0.314 | 0.246 | 113            | 130  | 21   | -32            | -47  | 6.82E-8 | 3.16E-7   | > 1.25E-5     |  |  |
| Renal Cancer                    |       |       |  |                                       |       |       |       |       |                |      |      |                |      |         |           |               |  |  |
| 786-0                           | 0.387 | 1.401 |  | 1.421                                 | 1.268 | 1.242 | 0.172 | 0.145 | 102            | 87   | 84   | -56            | -63  | 2.20E-7 | 5.00E-7   | 1.14E-6       |  |  |
| A498                            | 0.736 | 1.442 |  | 1.306                                 | 1.234 | 1.221 | 0.111 | 0.148 | 81             | 71   | 69   | -85            | -80  | 1.65E-7 | 3.50E-7   | 7.41E-7       |  |  |
| ACHN                            | 0.348 | 1.644 |  | 1.621                                 | 1.585 | 1.466 | 0.539 | 0.440 | 98             | 95   | 86   | 15             | 7    | 4.02E-7 | > 1.25E-5 | > 1.25E-5     |  |  |
| CAKI-1                          | 0.678 | 0.951 |  | 1.021                                 | 1.033 | 0.959 | 0.147 | 0.098 | 125            | 130  | 103  | -78            | -86  | 2.45E-7 | 4.62E-7   | 8.72E-7       |  |  |
| RXF 393                         | 0.649 | 1.144 |  | 1.107                                 | 1.090 | 1.102 | 0.170 | 0.136 | 93             | 89   | 92   | -74            | -79  | 2.23E-7 | 4.47E-7   | 8.96E-7       |  |  |
| SN12C                           | 0.519 | 1.914 |  | 1.880                                 | 1.692 | 1.664 | 0.846 | 0.728 | 98             | 84   | 82   | 23             | 15   | 4.40E-7 | > 1.25E-5 | > 1.25E-5     |  |  |
| TK-10                           | 0.374 | 1.377 |  | 1.312                                 | 1.260 | 1.373 | 0.496 | 0.357 | 94             | 88   | 100  | 12             | -5   | 4.62E-7 | 6.59E-6   | > 1.25E-5     |  |  |
| UO-31                           | 0.569 | 1.160 |  | 1.114                                 | 1.114 | 1.084 | 0.312 | 0.102 | 92             | 92   | 87   | -45            | -82  | 2.39E-7 | 5.70E-7   | 1.69E-6       |  |  |
| Prostate Cancer                 |       |       |  |                                       |       |       |       |       |                |      |      |                |      |         |           |               |  |  |
| PC-3                            | 0.397 | 1.602 |  | 1.610                                 | 1.529 | 1.239 | 0.591 | 0.503 | 101            | 94   | 70   | 16             | 9    | 2.93E-7 | > 1.25E-5 | > 1.25E-5     |  |  |
| DU-145                          | 0.309 | 1.236 |  | 1.160                                 | 0.930 | 0.952 | 0.357 | 0.252 | 92             | 67   | 69   | 5              | -18  | 2.50E-7 | 2.06E-6   | > 1.25E-5     |  |  |
| Breast Cancer                   |       |       |  |                                       |       |       |       |       |                |      |      |                |      |         |           |               |  |  |
| MCF7                            | 0.204 | 0.817 |  | 0.810                                 | 0.778 | 0.358 | 0.246 | 0.224 | 99             | 94   | 25   | 7              | 3    | 5.41E-8 | > 1.25E-5 | > 1.25E-5     |  |  |
| MDA-MB-231/ATCC                 | 0.449 | 1.196 |  | 1.160                                 | 1.070 | 0.892 | 0.572 | 0.490 | 95             | 83   | 59   | 16             | 5    | 2.06E-7 | > 1.25E-5 | > 1.25E-5     |  |  |
| HS 578T                         | 0.514 | 1.301 |  | 1.250                                 | 1.277 | 1.304 | 0.562 | 0.496 | 93             | 97   | 100  | 6              | -4   | 4.27E-7 | 5.32E-6   | > 1.25E-5     |  |  |
| BT-549                          | 0.792 | 1.354 |  | 1.339                                 | 1.292 | 1.091 | 0.102 | 0.066 | 97             | 89   | 53   | -87            | -92  | 1.32E-7 | 2.99E-7   | 6.79E-7       |  |  |
| T-47D                           | 0.443 | 1.197 |  | 1.167                                 | 1.148 | 1.095 | 0.648 | 0.619 | 96             | 94   | 86   | 27             | 23   | 5.15E-7 | > 1.25E-5 | > 1.25E-5     |  |  |
| MDA-MB-468                      | 0.536 | 1.431 |  | 1.344                                 | 1.284 | 0.661 | 0.214 | 0.187 | 90             | 84   | 14   | -60            | -65  | 3.80E-8 | 1.93E-7   | 9.12E-7       |  |  |

Table S5. NCI 60-cell line results for 7.

National Cancer Institute Developmental Therapeutics Program  
In-Vitro Testing Results

| NSC : D - 751844 / 1            |           |       |       | Experiment ID : 0912NS69              |       |       |       |      |      |      |      | Test Type : 08 |         | Units : Molar |           |
|---------------------------------|-----------|-------|-------|---------------------------------------|-------|-------|-------|------|------|------|------|----------------|---------|---------------|-----------|
| Report Date : February 01, 2010 |           |       |       | Test Date : December 14, 2009         |       |       |       |      |      |      |      | QNS :          |         | MC :          |           |
| COMI : PC 1003 (92207)          |           |       |       | Stain Reagent : SRB Dual-Pass Related |       |       |       |      |      |      |      | SSPL : K24A    |         |               |           |
| Log10 Concentration             |           |       |       |                                       |       |       |       |      |      |      |      |                |         |               |           |
| Panel/Cell Line                 | Time Zero | Ctrl  | -9.1  | -8.1                                  | -7.1  | -6.1  | -5.1  | -9.1 | -8.1 | -7.1 | -6.1 | -5.1           | GI50    | TGI           | LC50      |
| Leukemia                        |           |       |       |                                       |       |       |       |      |      |      |      |                |         |               |           |
| CCRF-CEM                        | 0.349     | 1.660 | 1.622 | 1.626                                 | 0.682 | 0.614 | 0.667 | 97   | 97   | 25   | 20   | 24             | 3.64E-8 | > 8.00E-6     | > 8.00E-6 |
| HL-60(TB)                       | 0.717     | 2.333 | 2.269 | 2.555                                 | 1.587 | 0.617 | 0.631 | 96   | 114  | 54   | -14  | -12            | 9.11E-8 | 4.98E-7       | > 8.00E-6 |
| K-562                           | 0.257     | 2.033 | 1.978 | 2.035                                 | 1.808 | 1.153 | 1.078 | 97   | 100  | 87   | 50   | 46             | 1.02E-6 | > 8.00E-6     | > 8.00E-6 |
| MOLT-4                          | 0.598     | 1.837 | 1.804 | 1.786                                 | 1.518 | 0.982 | 0.830 | 97   | 96   | 74   | 31   | 19             | 2.90E-7 | > 8.00E-6     | > 8.00E-6 |
| RPMI-8226                       | 0.685     | 2.203 | 2.264 | 2.152                                 | 1.336 | 0.981 | 0.825 | 104  | 97   | 43   | 19   | 9              | 5.90E-8 | > 8.00E-6     | > 8.00E-6 |
| Non-Small Cell Lung Cancer      |           |       |       |                                       |       |       |       |      |      |      |      |                |         |               |           |
| A549/ATCC                       | 0.353     | 1.345 | 1.285 | 1.288                                 | 0.368 | 0.383 | 0.355 | 94   | 94   | 1    | 3    |                | 2.40E-8 | > 8.00E-6     | > 8.00E-6 |
| EKVX                            | 0.633     | 1.451 | 1.391 | 1.417                                 | 1.071 | 0.604 | 0.576 | 93   | 96   | 54   | -5   | -9             | 9.22E-8 | 6.67E-7       | > 8.00E-6 |
| HOP-62                          | 0.259     | 0.942 | 0.943 | 1.008                                 | 0.508 | 0.238 | 0.238 | 100  | 110  | 36   | -8   | -8             | 5.23E-8 | 5.22E-7       | > 8.00E-6 |
| HOP-92                          | 1.146     | 1.963 | 1.925 | 1.848                                 | 1.824 | 0.643 | 0.717 | 95   | 86   | 83   | -44  | -37            | 1.46E-7 | 3.60E-7       | > 8.00E-6 |
| NCI-H226                        | 0.670     | 1.472 | 1.397 | 1.419                                 | 1.241 | 0.770 | 0.686 | 91   | 93   | 71   | 12   | 2              | 1.84E-7 | > 8.00E-6     | > 8.00E-6 |
| NCI-H23                         | 0.402     | 1.272 | 1.257 | 1.228                                 | 0.970 | 0.666 | 0.594 | 98   | 95   | 65   | 30   | 22             | 2.18E-7 | > 8.00E-6     | > 8.00E-6 |
| NCI-H322M                       | 0.461     | 0.745 | 0.710 | 0.759                                 | 0.542 | 0.473 | 0.409 | 88   | 105  | 28   | 4    | -11            | 4.18E-8 | 1.46E-6       | > 8.00E-6 |
| NCI-H460                        | 0.241     | 1.964 | 2.031 | 1.952                                 | 0.576 | 0.579 | 0.459 | 104  | 99   | 19   | 20   | 13             | 3.31E-8 | > 8.00E-6     | > 8.00E-6 |
| NCI-H522                        | 0.593     | 1.500 | 1.435 | 1.427                                 | 1.204 | 0.690 | 0.497 | 93   | 92   | 67   | 11   | -16            | 1.62E-7 | 1.99E-6       | > 8.00E-6 |
| Colon Cancer                    |           |       |       |                                       |       |       |       |      |      |      |      |                |         |               |           |
| COLO 205                        | 0.195     | 1.152 | 1.151 | 1.100                                 | 0.350 | 0.201 | 0.214 | 100  | 95   | 16   | 1    | 2              | 2.96E-8 | > 8.00E-6     | > 8.00E-6 |
| HCC-2998                        | 0.747     | 1.867 | 1.838 | 1.738                                 | 0.832 | 0.764 | 0.315 | 97   | 88   | 8    | 1    | -58            | 2.39E-8 | 8.47E-7       | 5.90E-6   |
| HCT-116                         | 0.239     | 1.626 | 1.555 | 1.622                                 | 0.754 | 0.481 | 0.417 | 95   | 100  | 37   | 17   | 13             | 4.98E-8 | > 8.00E-6     | > 8.00E-6 |
| HCT-15                          | 0.243     | 1.832 | 1.743 | 1.721                                 | 1.609 | 1.116 | 0.649 | 94   | 93   | 86   | 55   | 26             | 1.18E-6 | > 8.00E-6     | > 8.00E-6 |
| HT29                            | 0.153     | 0.976 | 0.946 | 0.913                                 | 0.246 | 0.224 | 0.191 | 96   | 92   | 11   | 9    | 5              | 2.66E-8 | > 8.00E-6     | > 8.00E-6 |
| KM12                            | 0.247     | 1.384 | 1.342 | 1.406                                 | 0.770 | 0.726 | 0.558 | 96   | 102  | 46   | 42   | 27             | 6.78E-8 | > 8.00E-6     | > 8.00E-6 |
| SW-620                          | 0.205     | 1.102 | 1.080 | 1.101                                 | 0.486 | 0.391 | 0.310 | 97   | 100  | 31   | 21   | 12             | 4.27E-8 | > 8.00E-6     | > 8.00E-6 |
| CNS Cancer                      |           |       |       |                                       |       |       |       |      |      |      |      |                |         |               |           |
| SF-268                          | 0.389     | 1.349 | 1.268 | 1.344                                 | 0.860 | 0.287 | 0.293 | 91   | 99   | 49   | -26  | -25            | 7.66E-8 | 3.59E-7       | > 8.00E-6 |
| SF-295                          | 0.751     | 1.235 | 1.139 | 1.066                                 | 0.648 | 0.467 | 0.373 | 80   | 65   | -14  | -38  | -50            | 1.24E-8 | 5.36E-8       | 7.52E-6   |
| SF-539                          | 0.602     | 2.068 | 1.916 | 1.895                                 | 1.637 | 0.701 | 0.637 | 90   | 88   | 71   | 7    | 2              | 1.68E-7 | > 8.00E-6     | > 8.00E-6 |
| SNB-19                          | 0.492     | 1.628 | 1.502 | 1.548                                 | 1.241 | 0.843 | 0.734 | 89   | 93   | 66   | 31   | 21             | 2.28E-7 | > 8.00E-6     | > 8.00E-6 |
| SNB-75                          | 0.519     | 1.029 | 0.954 | 1.014                                 | 0.783 | 0.078 | 0.057 | 85   | 97   | 52   | -85  | -89            | 8.24E-8 | 1.91E-7       | 4.43E-7   |
| U251                            | 0.273     | 1.633 | 1.540 | 1.443                                 | 0.630 | 0.350 | 0.299 | 93   | 86   | 26   | 6    | 2              | 3.20E-8 | > 8.00E-6     | > 8.00E-6 |
| Melanoma                        |           |       |       |                                       |       |       |       |      |      |      |      |                |         |               |           |
| LOX IMVI                        | 0.105     | 0.570 | 0.547 | 0.480                                 | 0.072 | 0.090 | 0.066 | 95   | 81   | -31  | -14  | -37            | 1.50E-8 | 4.20E-8       | > 8.00E-6 |
| MALME-3M                        | 0.844     | 1.389 | 1.256 | 1.301                                 | 1.034 | 0.618 | 0.559 | 76   | 84   | 35   | -27  | -34            | 3.94E-8 | 2.94E-7       | > 8.00E-6 |
| M14                             | 0.297     | 0.989 | 0.935 | 1.006                                 | 0.546 | 0.432 | 0.280 | 92   | 102  | 36   | 20   | -6             | 4.91E-8 | 4.69E-6       | > 8.00E-6 |
| MDA-MB-435                      | 0.349     | 1.173 | 1.129 | 1.129                                 | 0.682 | 0.558 | 0.446 | 95   | 95   | 40   | 25   | 12             | 5.31E-8 | > 8.00E-6     | > 8.00E-6 |
| SK-MEL-2                        | 0.714     | 1.610 | 1.582 | 1.664                                 | 0.907 | 0.629 | 0.482 | 97   | 106  | 21   | -12  | -33            | 3.68E-8 | 3.51E-7       | > 8.00E-6 |
| SK-MEL-28                       | 0.451     | 1.231 | 1.201 | 1.263                                 | 0.915 | 0.351 | 0.213 | 96   | 104  | 59   | -22  | -53            | 1.04E-7 | 4.27E-7       | 6.44E-6   |
| SK-MEL-5                        | 0.409     | 2.175 | 2.045 | 2.108                                 | 1.550 | 0.691 | 0.383 | 93   | 96   | 65   | 16   | -6             | 1.60E-7 | 4.12E-6       | > 8.00E-6 |
| UACC-257                        | 0.559     | 0.993 | 0.972 | 0.968                                 | 0.580 | 0.500 | 0.386 | 95   | 94   | 5    | -11  | -31            | 2.50E-8 | 1.63E-7       | > 8.00E-6 |
| UACC-62                         | 0.662     | 2.014 | 1.919 | 1.984                                 | 1.457 | 1.068 | 0.972 | 93   | 98   | 59   | 30   | 23             | 1.62E-7 | > 8.00E-6     | > 8.00E-6 |
| Ovarian Cancer                  |           |       |       |                                       |       |       |       |      |      |      |      |                |         |               |           |
| IGROV1                          | 0.479     | 0.771 | 0.777 | 0.672                                 | 0.154 | 0.136 | 0.172 | 102  | 66   | -68  | -72  | -64            | 1.06E-8 | 2.49E-8       | 5.89E-8   |
| OVCAR-3                         | 0.536     | 1.427 | 1.353 | 1.409                                 | 1.064 | 0.365 | 0.302 | 92   | 98   | 59   | -32  | -44            | 1.01E-7 | 3.57E-7       | > 8.00E-6 |
| OVCAR-5                         | 0.488     | 1.231 | 1.178 | 1.120                                 | 1.051 | 0.724 | 0.630 | 93   | 85   | 76   | 32   | 19             | 3.08E-7 | > 8.00E-6     | > 8.00E-6 |
| OVCAR-8                         | 0.228     | 1.041 | 1.037 | 0.989                                 | 0.770 | 0.458 | 0.328 | 99   | 94   | 67   | 28   | 12             | 2.17E-7 | > 8.00E-6     | > 8.00E-6 |
| NCI/ADR-RES                     | 0.283     | 0.910 | 0.901 | 0.881                                 | 0.833 | 0.684 | 0.434 | 99   | 95   | 88   | 64   | 24             | 1.79E-6 | > 8.00E-6     | > 8.00E-6 |
| SK-OV-3                         | 0.460     | 1.125 | 1.070 | 1.030                                 | 0.762 | 0.367 | 0.317 | 92   | 86   | 45   | -20  | -31            | 6.13E-8 | 3.93E-7       | > 8.00E-6 |
| Renal Cancer                    |           |       |       |                                       |       |       |       |      |      |      |      |                |         |               |           |
| 786-0                           | 0.387     | 1.401 | 1.320 | 1.426                                 | 1.063 | 0.200 | 0.217 | 92   | 102  | 67   | -48  | -44            | 1.12E-7 | 3.04E-7       | > 8.00E-6 |
| A498                            | 0.736     | 1.442 | 1.299 | 1.280                                 | 1.109 | 0.126 | 0.178 | 80   | 77   | 53   | -83  | -76            | 8.39E-8 | 1.96E-7       | 4.58E-7   |
| ACHN                            | 0.348     | 1.644 | 1.514 | 1.537                                 | 1.141 | 0.566 | 0.410 | 90   | 92   | 61   | 17   | 5              | 1.43E-7 | > 8.00E-6     | > 8.00E-6 |
| CAKI-1                          | 0.678     | 0.951 | 1.002 | 1.046                                 | 0.862 | 0.162 | 0.116 | 119  | 135  | 67   | -76  | -83            | 1.06E-7 | 2.36E-7       | 5.26E-7   |
| RXF 393                         | 0.649     | 1.144 | 1.091 | 1.099                                 | 1.038 | 0.138 | 0.228 | 89   | 91   | 79   | -79  | -65            | 1.22E-7 | 2.53E-7       | 5.25E-7   |
| SN12C                           | 0.519     | 1.914 | 1.828 | 1.842                                 | 1.558 | 1.057 | 0.767 | 94   | 95   | 74   | 39   | 18             | 3.84E-7 | > 8.00E-6     | > 8.00E-6 |
| TK-10                           | 0.374     | 1.377 | 1.276 | 1.314                                 | 1.313 | 0.535 | 0.451 | 90   | 94   | 94   | 16   | 8              | 2.92E-7 | > 8.00E-6     | > 8.00E-6 |
| UO-31                           | 0.569     | 1.160 | 1.025 | 1.074                                 | 0.984 | 0.294 | 0.147 | 77   | 86   | 70   | -48  | -74            | 1.19E-7 | 3.13E-7       | 9.28E-7   |
| Prostate Cancer                 |           |       |       |                                       |       |       |       |      |      |      |      |                |         |               |           |
| PC-3                            | 0.397     | 1.602 | 1.604 | 1.518                                 | 1.128 | 0.587 | 0.522 | 100  | 93   | 61   | 16   | 10             | 1.38E-7 | > 8.00E-6     | > 8.00E-6 |
| DU-145                          | 0.309     | 1.236 | 1.174 | 1.156                                 | 0.810 | 0.415 | 0.357 | 93   | 91   | 54   | 11   | 5              | 9.94E-8 | > 8.00E-6     | > 8.00E-6 |
| Breast Cancer                   |           |       |       |                                       |       |       |       |      |      |      |      |                |         |               |           |
| MCF7                            | 0.204     | 0.817 | 0.720 | 0.835                                 | 0.359 | 0.303 | 0.237 | 84   | 103  | 25   | 16   | 5              | 3.84E-8 | > 8.00E-6     | > 8.00E-6 |
| MDA-MB-231/ATCC                 | 0.449     | 1.196 | 1.090 | 1.143                                 | 0.811 | 0.601 | 0.500 | 86   | 93   | 48   | 20   | 7              | 7.35E-8 | > 8.00E-6     | > 8.00E-6 |
| HS 578T                         | 0.514     | 1.301 | 1.281 | 1.329                                 | 1.367 | 0.687 | 0.625 | 97   | 104  | 108  | 22   | 14             | 3.79E-7 | > 8.00E-6     | > 8.00E-6 |
| BT-549                          | 0.792     | 1.354 | 1.326 | 1.420                                 | 1.368 | 0.156 | 0.070 | 95   | 112  | 103  | -80  | -91            | 1.55E-7 | 2.91E-7       | 5.46E-7   |
| T-47D                           | 0.443     | 1.197 | 1.139 | 1.178                                 | 1.018 | 0.697 | 0.708 | 92   | 98   | 76   | 34   | 35             | 3.31E-7 | > 8.00E-6     | > 8.00E-6 |
| MDA-MB-468                      | 0.536     | 1.431 | 1.327 | 1.338                                 | 0.488 | 0.299 | 0.262 | 88   | 90   | -9   | -44  | -51            | 2.02E-8 | 6.48E-8       | 5.37E-7   |

Table S6. NCI 60-cell line results for 8.

**National Cancer Institute Developmental Therapeutics Program  
In-Vitro Testing Results**

| NSC : D - 751837 / 1            |       |       | Experiment ID : 0912NS69              |       |                        |       |       |      |      |                |      |      | Test Type : 08 |           | Units : Molar |           |
|---------------------------------|-------|-------|---------------------------------------|-------|------------------------|-------|-------|------|------|----------------|------|------|----------------|-----------|---------------|-----------|
| Report Date : February 01, 2010 |       |       | Test Date : December 14, 2009         |       |                        |       |       |      |      |                |      |      | QNS :          |           | MC :          |           |
| COMI : PC 811 (92196)           |       |       | Stain Reagent : SRB Dual-Pass Related |       |                        |       |       |      |      |                |      |      | SSPL : K24A    |           |               |           |
| Log10 Concentration             |       |       |                                       |       |                        |       |       |      |      |                |      |      |                |           |               |           |
| Panel/Cell Line                 | Time  |       |                                       |       | Mean Optical Densities |       |       |      |      | Percent Growth |      |      |                |           |               |           |
|                                 | Zero  | Ctrl  | -8.8                                  | -7.8  | -6.8                   | -5.8  | -4.8  | -8.8 | -7.8 | -6.8           | -5.8 | -4.8 |                | GI50      | TGI           | LC50      |
| Leukemia                        |       |       |                                       |       |                        |       |       |      |      |                |      |      |                |           |               |           |
| CCRF-CEM                        | 0.349 |       | 1.766                                 | 1.734 | 0.793                  | 0.647 | 0.536 | 104  | 102  | 33             | 22   | 14   | 8.01E-8        | > 1.43E-5 | > 1.43E-5     | > 1.43E-5 |
| HL-60(TB)                       | 0.717 | 1.972 | 2.059                                 | 2.071 | 0.942                  | 0.566 | 0.489 | 107  | 108  | 18             | -21  | -32  | 6.29E-8        | 4.12E-7   | > 1.43E-5     | > 1.43E-5 |
| K-562                           | 0.257 | 1.311 | 1.312                                 | 1.103 | 0.873                  | 0.716 | 0.218 | 100  | 80   | 58             | 44   | -15  | 5.24E-7        | 7.88E-6   | > 1.43E-5     | > 1.43E-5 |
| MOLT-4                          | 0.598 | 1.681 | 1.699                                 | 1.604 | 1.305                  | 0.894 | 0.449 | 102  | 93   | 65             | 27   | -25  | 3.61E-7        | 4.76E-6   | > 1.43E-5     | > 1.43E-5 |
| RPMI-8226                       | 0.685 | 2.244 | 2.343                                 | 2.203 | 1.400                  | 1.074 | 0.768 | 106  | 97   | 46             | 25   | 5    | 1.19E-7        | > 1.43E-5 | > 1.43E-5     | > 1.43E-5 |
| Non-Small Cell Lung Cancer      |       |       |                                       |       |                        |       |       |      |      |                |      |      |                |           |               |           |
| A549/ATCC                       | 0.353 | 1.063 | 1.096                                 | 0.946 | 0.304                  | 0.285 | 0.183 | 105  | 83   | -14            | -19  | -48  | 3.15E-8        | 1.03E-7   | > 1.43E-5     | > 1.43E-5 |
| EKVX                            | 0.633 | 1.554 | 1.614                                 | 1.458 | 1.037                  | 0.590 | 0.523 | 107  | 90   | 44             | -7   | -17  | 1.05E-7        | 1.05E-6   | > 1.43E-5     | > 1.43E-5 |
| HOP-62                          | 0.259 | 0.792 | 0.763                                 | 0.823 | 0.448                  | 0.292 | 0.104 | 95   | 106  | 35             | 6    | -60  | 8.88E-8        | 1.77E-6   | 1.01E-5       | > 1.43E-5 |
| HOP-92                          | 1.146 | 2.045 | 2.004                                 | 1.997 | 1.959                  | 0.582 | 1.115 | 95   | 95   | 90             | -49  | -3   | 2.78E-7        | 6.35E-7   | > 1.43E-5     | > 1.43E-5 |
| NCI-H226                        | 0.670 | 1.448 | 1.405                                 | 1.347 | 1.079                  | 0.842 | 0.509 | 94   | 87   | 52             | 22   | -24  | 1.73E-7        | 4.29E-6   | > 1.43E-5     | > 1.43E-5 |
| NCI-H23                         | 0.402 | 1.274 | 1.222                                 | 1.257 | 0.800                  | 0.644 | 0.339 | 94   | 98   | 46             | 28   | -16  | 1.18E-7        | 6.20E-6   | > 1.43E-5     | > 1.43E-5 |
| NCI-H322M                       | 0.461 | 0.894 | 0.895                                 | 0.884 | 0.735                  | 0.624 | 0.394 | 100  | 98   | 63             | 38   | -15  | 4.69E-7        | 7.49E-6   | > 1.43E-5     | > 1.43E-5 |
| NCI-H460                        | 0.241 | 1.866 | 1.967                                 | 1.232 | 0.581                  | 0.573 | 0.132 | 106  | 61   | 21             | 20   | -45  | 2.69E-8        | 2.93E-6   | > 1.43E-5     | > 1.43E-5 |
| NCI-H522                        | 0.593 | 0.802 | 0.729                                 | 0.637 | 0.365                  | 0.336 | 0.150 | 65   | 21   | -39            | -43  | -75  | 3.14E-9        | 3.21E-8   | 2.32E-6       | 2.32E-6   |
| Colon Cancer                    |       |       |                                       |       |                        |       |       |      |      |                |      |      |                |           |               |           |
| COLO 205                        | 0.195 | 1.210 | 1.250                                 | 1.240 | 0.534                  | 0.221 | 0.208 | 104  | 103  | 33             | 3    | 1    | 8.25E-8        | > 1.43E-5 | > 1.43E-5     | > 1.43E-5 |
| HCC-2998                        | 0.747 | 1.727 | 1.719                                 | 1.483 | 0.677                  | 0.705 | 0.114 | 99   | 75   | -9             | -6   | -85  | 2.83E-8        | 1.11E-7   | 5.20E-6       | 5.20E-6   |
| HCT-116                         | 0.239 | 1.640 | 1.594                                 | 1.330 | 0.725                  | 0.453 | 0.119 | 97   | 78   | 35             | 15   | -50  | 6.31E-8        | 2.44E-6   | 1.41E-5       | 1.41E-5   |
| HCT-15                          | 0.243 | 1.573 | 1.613                                 | 1.596 | 1.481                  | 0.947 | 0.357 | 103  | 102  | 93             | 53   | 9    | 1.67E-6        | > 1.43E-5 | > 1.43E-5     | > 1.43E-5 |
| HT29                            | 0.153 | 0.553 | 0.548                                 | 0.452 | 0.148                  | 0.131 | 0.098 | 99   | 75   | -4             | -14  | -36  | 2.96E-8        | 1.29E-7   | > 1.43E-5     | > 1.43E-5 |
| KM12                            | 0.247 | 1.278 | 1.253                                 | 1.155 | 0.715                  | 0.680 | 0.156 | 98   | 88   | 45             | 42   | -37  | 1.11E-7        | 4.86E-6   | > 1.43E-5     | > 1.43E-5 |
| SW-620                          | 0.205 | 1.218 | 1.217                                 | 1.017 | 0.702                  | 0.446 | 0.187 | 100  | 80   | 49             | 24   | -9   | 1.33E-7        | 7.58E-6   | > 1.43E-5     | > 1.43E-5 |
| CNS Cancer                      |       |       |                                       |       |                        |       |       |      |      |                |      |      |                |           |               |           |
| SF-268                          | 0.389 | 1.292 | 1.277                                 | 1.211 | 0.574                  | 0.352 | 0.220 | 98   | 91   | 20             | -10  | -44  | 5.45E-8        | 6.83E-7   | > 1.43E-5     | > 1.43E-5 |
| SF-295                          | 0.751 | 1.284 | 1.294                                 | 1.295 | 0.748                  | 0.431 | 0.211 | 102  | 102  | -              | -43  | -72  | 4.61E-8        | 1.42E-7   | 2.55E-6       | 2.55E-6   |
| SF-539                          | 0.602 | 1.958 | 1.921                                 | 1.844 | 1.119                  | 0.586 | 0.238 | 97   | 92   | 38             | -3   | -61  | 8.57E-8        | 1.23E-6   | 9.39E-6       | 9.39E-6   |
| SNB-19                          | 0.492 | 1.609 | 1.473                                 | 1.414 | 0.955                  | 0.839 | 0.414 | 88   | 83   | 41             | 31   | -16  | 8.84E-8        | 6.56E-6   | > 1.43E-5     | > 1.43E-5 |
| SNB-75                          | 0.519 | 1.012 | 0.963                                 | 0.900 | 0.558                  | 0.080 | 0.035 | 90   | 77   | 8              | -85  | -93  | 3.54E-8        | 1.74E-7   | 6.04E-7       | 6.04E-7   |
| U251                            | 0.273 | 1.142 | 1.101                                 | 0.938 | 0.329                  | 0.210 | 0.146 | 95   | 76   | 6              | -23  | -47  | 3.41E-8        | 2.36E-7   | > 1.43E-5     | > 1.43E-5 |
| Melanoma                        |       |       |                                       |       |                        |       |       |      |      |                |      |      |                |           |               |           |
| LOX IMVI                        | 0.105 | 0.641 | 0.556                                 | 0.518 | 0.189                  | 0.089 | 0.052 | 84   | 77   | 16             | -15  | -50  | 3.93E-8        | 4.59E-7   | 1.39E-5       | 1.39E-5   |
| MALME-3M                        | 0.844 | 1.528 | 1.473                                 | 1.302 | 1.245                  | 0.955 | 0.627 | 92   | 67   | 59             | 16   | -26  | 2.28E-7        | 3.49E-6   | > 1.43E-5     | > 1.43E-5 |
| M14                             | 0.297 | 0.994 | 0.966                                 | 0.932 | 0.608                  | 0.442 | 0.042 | 96   | 91   | 45             | 21   | -86  | 1.10E-7        | 2.24E-6   | 6.58E-6       | 6.58E-6   |
| MDA-MB-435                      | 0.349 | 1.201 | 1.210                                 | 1.161 | 0.797                  | 0.534 | 0.106 | 101  | 95   | 53             | 22   | -70  | 1.72E-7        | 2.47E-6   | 8.72E-6       | 8.72E-6   |
| SK-MEL-2                        | 0.714 | 0.999 | 0.987                                 | 0.936 | 0.573                  | 0.396 | 0.192 | 96   | 78   | -20            | -45  | -73  | 2.75E-8        | 8.97E-8   | 2.21E-6       | 2.21E-6   |
| SK-MEL-28                       | 0.451 | 1.331 | 1.332                                 | 1.273 | 1.023                  | 0.777 | 0.282 | 100  | 93   | 65             | 37   | -38  | 4.91E-7        | 4.49E-6   | > 1.43E-5     | > 1.43E-5 |
| SK-MEL-5                        | 0.409 | 2.236 | 2.241                                 | 2.072 | 1.562                  | 0.913 | 0.049 | 100  | 91   | 63             | 28   | -88  | 3.34E-7        | 2.48E-6   | 6.70E-6       | 6.70E-6   |
| UACC-257                        | 0.559 | 0.945 | 0.951                                 | 0.943 | 0.580                  | 0.494 | 0.323 | 101  | 99   | 5              | -12  | -42  | 4.80E-8        | 2.97E-7   | > 1.43E-5     | > 1.43E-5 |
| UACC-62                         | 0.662 | 2.012 | 1.945                                 | 1.801 | 1.336                  | 1.258 | 0.455 | 95   | 84   | 50             | 44   | -31  | 1.42E-7        | 5.50E-6   | > 1.43E-5     | > 1.43E-5 |
| Ovarian Cancer                  |       |       |                                       |       |                        |       |       |      |      |                |      |      |                |           |               |           |
| IGROV1                          | 0.479 | 0.889 | 0.997                                 | 0.896 | 0.286                  | 0.202 | 0.211 | 126  | 102  | -40            | -58  | -56  | 3.31E-8        | 7.44E-8   | 5.12E-7       | 5.12E-7   |
| OVCAR-3                         | 0.536 | 1.356 | 1.377                                 | 1.320 | 0.894                  | 0.500 | 0.249 | 103  | 96   | 44             | -7   | -54  | 1.08E-7        | 1.05E-6   | 1.20E-5       | 1.20E-5   |
| OVCAR-4                         | 0.347 | 0.599 | 0.619                                 | 0.555 | 0.418                  | 0.305 | 0.264 | 108  | 83   | 28             | -12  | -24  | 5.70E-8        | 7.12E-7   | > 1.43E-5     | > 1.43E-5 |
| OVCAR-5                         | 0.488 | 1.177 | 1.157                                 | 1.160 | 0.946                  | 0.733 | 0.616 | 97   | 98   | 66             | 36   | 19   | 4.88E-7        | > 1.43E-5 | > 1.43E-5     | > 1.43E-5 |
| OVCAR-8                         | 0.228 | 0.740 | 0.733                                 | 0.729 | 0.561                  | 0.380 | 0.142 | 99   | 98   | 65             | 30   | -38  | 3.82E-7        | 3.94E-6   | > 1.43E-5     | > 1.43E-5 |
| NCI/ADR-RES                     | 0.283 | 0.940 | 0.953                                 | 0.937 | 0.875                  | 0.601 | 0.288 | 102  | 99   | 90             | 48   | 1    | 1.31E-6        | > 1.43E-5 | > 1.43E-5     | > 1.43E-5 |
| SK-OV-3                         | 0.460 | 1.035 | 1.039                                 | 1.030 | 0.790                  | 0.518 | 0.338 | 101  | 99   | 57             | 10   | -27  | 2.05E-7        | 2.69E-6   | > 1.43E-5     | > 1.43E-5 |
| Renal Cancer                    |       |       |                                       |       |                        |       |       |      |      |                |      |      |                |           |               |           |
| 786-O                           | 0.387 | 1.439 | 1.454                                 | 1.372 | 0.980                  | 0.176 | 0.194 | 101  | 94   | 56             | -55  | -50  | 1.63E-7        | 4.60E-7   | 1.43E-5       | 1.43E-5   |
| A498                            | 0.736 | 1.432 | 1.397                                 | 1.212 | 0.897                  | 0.129 | 0.218 | 95   | 68   | 23             | -83  | -70  | 3.63E-8        | 2.36E-7   | 7.03E-7       | 7.03E-7   |
| ACHN                            | 0.348 | 1.550 | 1.556                                 | 1.501 | 1.191                  | 0.494 | 0.366 | 100  | 96   | 70             | 12   | 1    | 3.18E-7        | > 1.43E-5 | > 1.43E-5     | > 1.43E-5 |
| CAKI-1                          | 0.678 | 1.038 | 1.046                                 | 1.088 | 0.905                  | 0.163 | 0.197 | 102  | 114  | 63             | -76  | -71  | 1.78E-7        | 4.06E-7   | 9.30E-7       | 9.30E-7   |
| RXF 393                         | 0.649 | 1.230 | 1.198                                 | 1.190 | 0.902                  | 0.185 | 0.062 | 94   | 93   | 44             | -71  | -90  | 1.06E-7        | 3.42E-7   | 9.30E-7       | 9.30E-7   |
| SN12C                           | 0.519 | 1.912 | 1.895                                 | 1.716 | 1.403                  | 1.064 | 0.646 | 99   | 86   | 63             | 39   | 9    | 5.10E-7        | > 1.43E-5 | > 1.43E-5     | > 1.43E-5 |
| TK-10                           | 0.374 | 0.529 | 0.520                                 | 0.494 | 0.245                  | 0.141 | 0.188 | 94   | 77   | -34            | -62  | -50  | 2.51E-8        | 7.03E-8   | .             | .         |
| UO-31                           | 0.569 | 1.188 | 1.159                                 | 1.148 | 1.094                  | 0.262 | 0.303 | 95   | 94   | 85             | -54  | -47  | 2.55E-7        | 5.84E-7   | .             | .         |
| Prostate Cancer                 |       |       |                                       |       |                        |       |       |      |      |                |      |      |                |           |               |           |
| PC-3                            | 0.397 | 1.621 | 1.693                                 | 1.670 | 1.310                  | 0.869 | 0.503 | 106  | 104  | 75             | 39   | 9    | 6.87E-7        | > 1.43E-5 | > 1.43E-5     | > 1.43E-5 |
| DU-145                          | 0.309 | 1.123 | 1.152                                 | 1.009 | 0.856                  | 0.443 | 0.199 | 104  | 86   | 67             | 16   | -36  | 3.13E-7        | 2.96E-6   | > 1.43E-5     | > 1.43E-5 |
| Breast Cancer                   |       |       |                                       |       |                        |       |       |      |      |                |      |      |                |           |               |           |
| MCF7                            | 0.204 | 1.049 | 1.031                                 | 0.916 | 0.590                  | 0.476 | 0.161 | 98   | 84   | 46             | 32   | -21  | 1.10E-7        | 5.71E-6   | > 1.43E-5     | > 1.43E-5 |
| MDA-MB-231/ATCC                 | 0.449 | 1.138 | 1.125                                 | 1.022 | 0.733                  | 0.613 | 0.412 | 98   | 83   | 41             | 24   | -8   | 8.80E-8        | 7.85E-6   | > 1.43E-5     | > 1.43E-5 |
| HS 578T                         | 0.514 | 1.108 | 1.107                                 | 1.124 | 0.926                  | 0.571 | 0.388 | 100  | 103  | 69             | 10   | -25  | 3.01E-7        | 2.72E-6   | > 1.43E-5     | > 1.43E-5 |
| BT-549                          | 0.792 | 1.372 | 1.349                                 | 1.322 | 1.020                  | 0.213 | 0.065 | 96   | 91   | 39             | -73  | -92  | 8.90E-8        | 3.20E-7   | 8.90E-7       | 8.90E-7   |
| T-47D                           | 0.443 | 0.940 | 0.922                                 | 0.948 | 0.818                  | 0.703 | 0.338 | 96   | 102  | 76             | 52   | -24  | 1.54E-6        | 6.98E-6   | > 1.43E-5     | > 1.43E-5 |
| MDA-MB-468                      | 0.536 | 1.361 | 1.314                                 | 1.124 | 0.588                  | 0.352 | 0.130 | 94   | 71   | 6              | -34  | -76  | 3.04E-8        | 2.04E-7   | 3.42E-6       | 3.42E-6   |

Table S7. NCI 60-cell line results for 9.

National Cancer Institute Developmental Therapeutics Program  
In-Vitro Testing Results

| NSC : D - 666654 / 1         |           |       | Experiment ID : 9312SR87              |       |       |       |       |                |      |      |      |      | Test Type : 08 |           |           | Units : Molar |  |
|------------------------------|-----------|-------|---------------------------------------|-------|-------|-------|-------|----------------|------|------|------|------|----------------|-----------|-----------|---------------|--|
| Report Date : April 12, 2010 |           |       | Test Date : December 14, 1993         |       |       |       |       |                |      |      |      |      | QNS :          |           |           | MC :          |  |
| COMI : PC# 447               |           |       | Stain Reagent : SRB Dual-Pass Related |       |       |       |       |                |      |      |      |      | SSPL : K24A    |           |           |               |  |
| Log10 Concentration          |           |       |                                       |       |       |       |       |                |      |      |      |      |                |           |           |               |  |
| Panel/Cell Line              | Time Zero | Ctrl  | Mean Optical Densities                |       |       |       |       | Percent Growth |      |      |      |      | GI50           | TGI       | LC50      |               |  |
|                              |           |       | -8.0                                  | -7.0  | -6.0  | -5.0  | -4.0  | -8.0           | -7.0 | -6.0 | -5.0 | -4.0 |                |           |           |               |  |
| Leukemia                     |           |       |                                       |       |       |       |       |                |      |      |      |      |                |           |           |               |  |
| CCRF-CEM                     | 0.347     | 0.902 | 0.944                                 | 0.925 | 0.551 | 0.552 | 0.507 | 107            | 104  | 37   | 37   | 29   | 6.34E-7        | > 1.00E-4 | > 1.00E-4 |               |  |
| HL-60(TB)                    | 0.515     | 1.549 | 1.620                                 | 1.388 | 0.563 | 0.398 | 0.340 | 107            | 84   | 5    | -23  | -34  | 2.70E-7        | 1.48E-6   | > 1.00E-4 |               |  |
| K-562                        | 0.161     | 0.871 | 0.845                                 | 0.726 | 0.492 | 0.499 | 0.294 | 96             | 80   | 47   | 48   | 19   | 7.92E-7        | > 1.00E-4 | > 1.00E-4 |               |  |
| MOLT-4                       | 0.428     | 1.526 | 1.513                                 | 1.521 | 1.052 | 0.959 | 0.576 | 99             | 99   | 57   | 48   | 13   | 6.38E-6        | > 1.00E-4 | > 1.00E-4 |               |  |
| RPMI-8226                    | 0.300     | 0.547 | 0.533                                 | 0.463 | 0.336 | 0.290 | 0.210 | 94             | 66   | 15   | -3   | -30  | 2.03E-7        | 6.40E-6   | > 1.00E-4 |               |  |
| SR                           | 0.396     | 1.452 | 1.549                                 | 1.394 | 1.015 | 0.859 | 0.365 | 109            | 95   | 59   | 44   | -8   | 3.85E-6        | 7.06E-5   | > 1.00E-4 |               |  |
| Non-Small Cell Lung Cancer   |           |       |                                       |       |       |       |       |                |      |      |      |      |                |           |           |               |  |
| A549/ATCC                    | 0.433     | 1.745 | 1.766                                 | 1.755 | 1.563 | 0.899 | 0.419 | 102            | 101  | 86   | 36   | -3   | 5.18E-6        | 8.20E-5   | > 1.00E-4 |               |  |
| EKVX                         | 0.823     | 1.964 | 1.943                                 | 1.939 | 1.842 | 1.281 | 0.823 | 98             | 98   | 89   | 40   | .    | 6.29E-6        | 9.97E-5   | > 1.00E-4 |               |  |
| HOP-62                       | 0.281     | 0.870 | 0.912                                 | 0.863 | 0.650 | 0.433 | 0.171 | 107            | 99   | 63   | 26   | -39  | 2.20E-6        | 2.50E-5   | > 1.00E-4 |               |  |
| NCI-H226                     | 1.117     | 1.590 | 1.538                                 | 1.519 | 1.546 | 1.028 | 0.386 | 89             | 85   | 91   | -8   | -65  | 2.59E-6        | 8.30E-6   | 5.39E-5   |               |  |
| NCI-H23                      | 0.825     | 2.225 | 2.163                                 | 2.181 | 1.502 | 1.323 | 0.854 | 96             | 97   | 48   | 36   | 2    | 9.24E-7        | > 1.00E-4 | > 1.00E-4 |               |  |
| NCI-H322M                    | 0.516     | 1.399 | 1.452                                 | 1.541 | 1.314 | 0.984 | 0.637 | 108            | 116  | 90   | 53   | 14   | 1.19E-5        | > 1.00E-4 | > 1.00E-4 |               |  |
| NCI-H460                     | 0.209     | 1.818 | 1.773                                 | 1.587 | 0.757 | 0.501 | 0.235 | 97             | 86   | 34   | 18   | 2    | 4.91E-7        | > 1.00E-4 | > 1.00E-4 |               |  |
| NCI-H522                     | 0.340     | 0.891 | 0.875                                 | 0.642 | 0.267 | 0.459 | 0.171 | 97             | 55   | -22  | 22   | -50  | 1.15E-7        | .         | > 1.00E-4 |               |  |
| Colon Cancer                 |           |       |                                       |       |       |       |       |                |      |      |      |      |                |           |           |               |  |
| COLO 205                     | 0.191     | 1.745 | 1.688                                 | 1.760 | 0.774 | 0.409 | 0.410 | 96             | 101  | 38   | 14   | 14   | 6.36E-7        | > 1.00E-4 | > 1.00E-4 |               |  |
| HCC-2998                     | 0.243     | 0.472 | 0.433                                 | 0.424 | 0.274 | 0.301 | 0.142 | 83             | 79   | 13   | 25   | -42  | 2.77E-7        | 2.38E-5   | > 1.00E-4 |               |  |
| HCT-116                      | 0.170     | 1.451 | 1.375                                 | 1.222 | 0.339 | 0.525 | 0.271 | 94             | 82   | 13   | 28   | 8    | 2.92E-7        | > 1.00E-4 | > 1.00E-4 |               |  |
| HCT-15                       | 0.308     | 1.306 | 1.385                                 | 1.387 | 1.358 | 1.257 | 0.529 | 108            | 108  | 105  | 95   | 22   | 4.15E-5        | > 1.00E-4 | > 1.00E-4 |               |  |
| HT29                         | 0.184     | 1.421 | 1.373                                 | 1.382 | 0.721 | 0.335 | 0.273 | 96             | 97   | 43   | 12   | 7    | 7.53E-7        | > 1.00E-4 | > 1.00E-4 |               |  |
| KM12                         | 0.395     | 1.660 | 1.676                                 | 1.593 | 1.048 | 1.060 | 0.620 | 101            | 95   | 52   | 53   | 18   | 1.19E-5        | > 1.00E-4 | > 1.00E-4 |               |  |
| SW-620                       | 0.165     | 0.659 | 0.670                                 | 0.654 | 0.394 | 0.473 | 0.329 | 102            | 99   | 46   | 62   | 33   | .              | > 1.00E-4 | > 1.00E-4 |               |  |
| CNS Cancer                   |           |       |                                       |       |       |       |       |                |      |      |      |      |                |           |           |               |  |
| SF-268                       | 0.514     | 1.095 | 1.114                                 | 1.135 | 1.116 | 0.569 | 0.398 | 103            | 107  | 104  | 9    | -23  | 3.71E-6        | 1.97E-5   | > 1.00E-4 |               |  |
| SF-295                       | 0.325     | 1.078 | 1.144                                 | 1.237 | 0.990 | 0.734 | 0.268 | 109            | 121  | 88   | 54   | -18  | 1.15E-5        | 5.68E-5   | > 1.00E-4 |               |  |
| SF-539                       | 0.635     | 1.496 | 1.508                                 | 1.630 | 1.419 | 0.668 | 0.368 | 101            | 116  | 91   | 4    | -42  | 2.96E-6        | 1.21E-5   | > 1.00E-4 |               |  |
| SNB-19                       | 0.746     | 1.915 | 1.969                                 | 1.874 | 1.581 | 1.091 | 0.575 | 105            | 97   | 71   | 30   | -23  | 3.24E-6        | 3.65E-5   | > 1.00E-4 |               |  |
| SNB-75                       | 0.417     | 1.394 | 1.349                                 | 1.278 | 1.079 | 0.394 | 0.174 | 95             | 88   | .    | -6   | -58  | 6.53E-7        | 7.62E-6   | 6.97E-5   |               |  |
| U251                         | 0.677     | 2.236 | 2.245                                 | 2.072 | 1.280 | 0.901 | 0.565 | 101            | 89   | 39   | 14   | -17  | 5.98E-7        | 2.92E-5   | > 1.00E-4 |               |  |
| Melanoma                     |           |       |                                       |       |       |       |       |                |      |      |      |      |                |           |           |               |  |
| LOX IMVI                     | 0.212     | 0.776 | 0.739                                 | 0.702 | 0.227 | 0.240 | 0.217 | 94             | 87   | 3    | 5    | 1    | 2.75E-7        | > 1.00E-4 | > 1.00E-4 |               |  |
| MALME-3M                     | 0.375     | 0.783 | 0.823                                 | 0.823 | 0.743 | 0.566 | 0.356 | 110            | 110  | 90   | 47   | -5   | 8.43E-6        | 7.94E-5   | > 1.00E-4 |               |  |
| M14                          | 0.176     | 0.662 | 0.725                                 | 0.602 | 0.556 | 0.328 | 0.146 | 113            | 88   | 78   | 31   | -17  | 3.99E-6        | 4.48E-5   | > 1.00E-4 |               |  |
| SK-MEL-2                     | 0.452     | 1.139 | 1.074                                 | 1.109 | 0.679 | 0.546 | 0.226 | 91             | 96   | 33   | 14   | -50  | 5.36E-7        | 1.64E-5   | 9.96E-5   |               |  |
| SK-MEL-28                    | 0.622     | 1.919 | 1.870                                 | 1.862 | 1.431 | 1.199 | 0.465 | 96             | 96   | 62   | 44   | -25  | 4.90E-6        | 4.34E-5   | > 1.00E-4 |               |  |
| SK-MEL-5                     | 0.315     | 1.498 | 1.350                                 | 1.076 | 0.713 | 0.434 | 0.203 | 87             | 64   | 34   | 10   | -36  | 2.93E-7        | 1.66E-5   | > 1.00E-4 |               |  |
| UACC-257                     | 0.462     | 1.731 | 1.710                                 | 1.738 | 0.954 | 0.918 | 0.577 | 98             | 101  | 39   | 36   | 9    | 6.59E-7        | > 1.00E-4 | > 1.00E-4 |               |  |
| UACC-62                      | 0.353     | 1.470 | 1.470                                 | 1.505 | 0.788 | 0.716 | 0.164 | 100            | 103  | 39   | 32   | -54  | 6.71E-7        | 2.38E-5   | 9.06E-5   |               |  |
| Ovarian Cancer               |           |       |                                       |       |       |       |       |                |      |      |      |      |                |           |           |               |  |
| IGROV1                       | 0.323     | 1.474 | 1.418                                 | 1.413 | 1.116 | 0.297 | 0.164 | 95             | 95   | 69   | -8   | -49  | 1.76E-6        | 7.89E-6   | > 1.00E-4 |               |  |
| OVCAR-4                      | 0.186     | 0.533 | 0.516                                 | 0.542 | 0.463 | 0.360 | 0.209 | 95             | 103  | 80   | 50   | 7    | 1.01E-5        | > 1.00E-4 | > 1.00E-4 |               |  |
| OVCAR-5                      | 0.703     | 1.285 | 1.323                                 | 1.294 | 1.221 | 0.920 | 0.613 | 107            | 102  | 89   | 37   | -13  | 5.67E-6        | 5.55E-5   | > 1.00E-4 |               |  |
| OVCAR-8                      | 0.305     | 1.623 | 1.634                                 | 1.635 | 1.570 | 0.957 | 0.362 | 101            | 101  | 96   | 49   | 4    | 9.75E-6        | > 1.00E-4 | > 1.00E-4 |               |  |
| NCI/ADR-RES                  | 0.359     | 0.932 | 1.004                                 | 0.974 | 0.960 | 1.018 | 0.809 | 113            | 107  | 105  | 115  | 79   | > 1.00E-4      | > 1.00E-4 | > 1.00E-4 |               |  |
| SK-OV-3                      | 0.256     | 0.686 | 0.660                                 | 0.674 | 0.711 | 0.419 | 0.150 | 94             | 97   | 106  | 38   | -42  | 6.61E-6        | 2.99E-5   | > 1.00E-4 |               |  |
| Renal Cancer                 |           |       |                                       |       |       |       |       |                |      |      |      |      |                |           |           |               |  |
| 786-0                        | 0.207     | 1.159 | 1.192                                 | 1.189 | 1.131 | 0.581 | 0.140 | 104            | 103  | 97   | 39   | -32  | 6.51E-6        | 3.53E-5   | > 1.00E-4 |               |  |
| ACHN                         | 0.432     | 1.770 | 1.768                                 | 1.805 | 1.681 | 1.110 | 0.437 | 100            | 103  | 93   | 51   | .    | 1.03E-5        | > 1.00E-4 | > 1.00E-4 |               |  |
| CAKI-1                       | 0.286     | 1.242 | 1.202                                 | 1.205 | 1.279 | 0.875 | 0.062 | 96             | 96   | 104  | 62   | -78  | 1.21E-5        | 2.75E-5   | 6.26E-5   |               |  |
| RXF 393                      | 1.144     | 1.485 | 1.456                                 | 1.532 | 1.549 | 0.867 | 0.212 | 91             | 114  | 119  | -24  | -82  | 3.03E-6        | 6.77E-6   | 2.82E-5   |               |  |
| SN12C                        | 0.320     | 1.134 | 1.141                                 | 1.123 | 0.987 | 0.630 | 0.438 | 101            | 99   | 82   | 38   | 14   | 5.35E-6        | > 1.00E-4 | > 1.00E-4 |               |  |
| TK-10                        | 0.891     | 1.688 | 1.748                                 | 1.747 | 1.813 | 1.232 | 0.417 | 108            | 107  | 116  | 43   | -53  | 7.95E-6        | 2.79E-5   | 9.26E-5   |               |  |
| UO-31                        | 1.124     | 2.188 | 2.035                                 | 2.055 | 2.202 | 2.105 | 0.233 | 86             | 87   | 101  | 92   | -79  | 1.76E-5        | 3.45E-5   | 6.75E-5   |               |  |
| Prostate Cancer              |           |       |                                       |       |       |       |       |                |      |      |      |      |                |           |           |               |  |
| PC-3                         | 0.575     | 1.493 | 1.523                                 | 1.630 | 1.069 | 0.843 | 0.510 | 103            | 115  | 54   | 29   | -11  | 1.43E-6        | 5.26E-5   | > 1.00E-4 |               |  |
| DU-145                       | 0.495     | 1.589 | 1.673                                 | 1.690 | 1.611 | 1.239 | 0.523 | 108            | 109  | 102  | 68   | 3    | 1.88E-5        | > 1.00E-4 | > 1.00E-4 |               |  |
| Breast Cancer                |           |       |                                       |       |       |       |       |                |      |      |      |      |                |           |           |               |  |
| MCF7                         | 0.335     | 1.008 | 0.967                                 | 0.913 | 0.663 | 0.418 | 0.211 | 94             | 86   | 49   | 12   | -37  | 9.27E-7        | 1.77E-5   | > 1.00E-4 |               |  |
| MDA-MB-231/ATCC              | 0.360     | 0.970 | 1.001                                 | 0.982 | 0.825 | 0.423 | 0.196 | 105            | 102  | 76   | 10   | -46  | 2.50E-6        | 1.52E-5   | > 1.00E-4 |               |  |
| HS 578T                      | 0.577     | 1.568 | 1.452                                 | 1.493 | 1.438 | 0.846 | 0.551 | 88             | 93   | 87   | 27   | -5   | 4.15E-6        | 7.21E-5   | > 1.00E-4 |               |  |
| MDA-N                        | 0.385     | 2.058 | 2.073                                 | 2.041 | 1.859 | 1.209 | 0.539 | 101            | 99   | 88   | 49   | 9    | 9.58E-6        | > 1.00E-4 | > 1.00E-4 |               |  |
| BT-549                       | 0.840     | 1.412 | 1.403                                 | 1.422 | 1.514 | 0.901 | 0.269 | 98             | 102  | 118  | 11   | -68  | 4.29E-6        | 1.37E-5   | 5.90E-5   |               |  |
| T-47D                        | 0.534     | 1.185 | 1.122                                 | 1.255 | 1.359 | 1.193 | 0.622 | 90             | 111  | 127  | 101  | 13   | 3.83E-5        | > 1.00E-4 | > 1.00E-4 |               |  |



Table S8. NCI 60-cell line results for 11.

**National Cancer Institute Developmental Therapeutics Program  
In-Vitro Testing Results**

| NSC : D - 751840 / 1            |           |       | Experiment ID : 0912NS69              |       |       |       |       |      |      |      |      |      | Test Type : 08 |           | Units : Molar |  |
|---------------------------------|-----------|-------|---------------------------------------|-------|-------|-------|-------|------|------|------|------|------|----------------|-----------|---------------|--|
| Report Date : February 01, 2010 |           |       | Test Date : December 14, 2009         |       |       |       |       |      |      |      |      |      | QNS :          |           | MC :          |  |
| COMI : PC 889 (92203)           |           |       | Stain Reagent : SRB Dual-Pass Related |       |       |       |       |      |      |      |      |      | SSPL : K24A    |           |               |  |
| Log10 Concentration             |           |       |                                       |       |       |       |       |      |      |      |      |      |                |           |               |  |
| Panel/Cell Line                 | Time Zero | Ctrl  | -8.8                                  | -7.8  | -6.8  | -5.8  | -4.8  | -8.8 | -7.8 | -6.8 | -5.8 | -4.8 | GI50           | TGI       | LC50          |  |
| Leukemia                        |           |       |                                       |       |       |       |       |      |      |      |      |      |                |           |               |  |
| CCRF-CEM                        | 0.349     | 1.583 | 1.524                                 | 1.547 | 1.156 | 0.845 | 0.647 | 95   | 97   | 65   | 40   | 24   | 6.73E-7        | > 1.65E-5 | > 1.65E-5     |  |
| HL-60(TB)                       | 0.717     | 2.326 | 2.129                                 | 2.097 | 1.136 | 0.623 | 0.562 | 88   | 86   | 26   | -13  | -22  | 6.55E-8        | 7.63E-7   | > 1.65E-5     |  |
| K-562                           | 0.257     | 1.337 | 1.249                                 | 1.223 | 0.960 | 0.782 | 0.327 | 92   | 89   | 65   | 49   | 6    | 1.35E-6        | > 1.65E-5 | > 1.65E-5     |  |
| MOLT-4                          | 0.598     | 1.723 | 1.706                                 | 1.545 | 1.404 | 1.116 | 0.535 | 98   | 84   | 72   | 46   | -11  | 1.15E-6        | 1.07E-5   | > 1.65E-5     |  |
| RPMI-8226                       | 0.685     | 2.244 | 2.212                                 | 2.156 | 1.406 | 1.254 | 0.680 | 98   | 94   | 46   | 36   | -1   | 1.38E-7        | 1.57E-5   | > 1.65E-5     |  |
| Non-Small Cell Lung Cancer      |           |       |                                       |       |       |       |       |      |      |      |      |      |                |           |               |  |
| A549/ATCC                       | 0.353     | 1.074 | 1.057                                 | 1.072 | 0.928 | 0.446 | 0.270 | 98   | 100  | 80   | 13   | -24  | 4.59E-7        | 3.71E-6   | > 1.65E-5     |  |
| EKVX                            | 0.633     | 1.567 | 1.506                                 | 1.516 | 1.400 | 0.895 | 0.618 | 93   | 95   | 82   | 28   | -2   | 6.48E-7        | 1.38E-5   | > 1.65E-5     |  |
| HOP-62                          | 0.259     | 0.766 | 0.840                                 | 0.767 | 0.654 | 0.442 | 0.255 | 115  | 100  | 78   | 36   | -2   | 7.69E-7        | 1.50E-5   | > 1.65E-5     |  |
| HOP-92                          | 1.146     | 1.967 | 1.928                                 | 1.797 | 1.834 | 1.481 | 1.010 | 95   | 79   | 84   | 41   | -12  | 1.01E-6        | 9.81E-6   | > 1.65E-5     |  |
| NCI-H226                        | 0.670     | 1.461 | 1.384                                 | 1.496 | 1.452 | 1.129 | 0.819 | 90   | 104  | 99   | 58   | 19   | 2.64E-6        | > 1.65E-5 | > 1.65E-5     |  |
| NCI-H23                         | 0.402     | 1.268 | 1.256                                 | 1.202 | 0.879 | 0.788 | 0.592 | 99   | 92   | 55   | 45   | 22   | 4.94E-7        | > 1.65E-5 | > 1.65E-5     |  |
| NCI-H322M                       | 0.461     | 0.875 | 0.846                                 | 0.873 | 0.844 | 0.689 | 0.493 | 93   | 100  | 93   | 55   | 8    | 2.12E-6        | > 1.65E-5 | > 1.65E-5     |  |
| NCI-H460                        | 0.241     | 2.027 | 2.037                                 | 2.149 | 1.176 | 0.568 | 0.396 | 101  | 107  | 52   | 18   | 9    | 1.93E-7        | > 1.65E-5 | > 1.65E-5     |  |
| NCI-H522                        | 0.593     | 1.325 | 1.236                                 | 1.103 | 0.712 | 0.609 | 0.579 | 88   | 70   | 16   | 2    | -2   | 3.85E-8        | 4.89E-6   | > 1.65E-5     |  |
| Colon Cancer                    |           |       |                                       |       |       |       |       |      |      |      |      |      |                |           |               |  |
| COLO 205                        | 0.195     | 1.172 | 1.200                                 | 1.124 | 0.632 | 0.134 | 0.239 | 103  | 95   | 45   | -32  | 5    | 1.29E-7        |           | > 1.65E-5     |  |
| HCC-2998                        | 0.747     | 1.716 | 1.782                                 | 1.563 | 0.814 | 0.705 | 0.458 | 107  | 84   | 7    | -6   | -39  | 4.57E-8        | 5.84E-7   | > 1.65E-5     |  |
| HCT-116                         | 0.239     | 1.618 | 1.567                                 | 1.612 | 0.623 | 0.572 | 0.358 | 96   | 100  | 28   | 24   | 9    | 8.10E-8        | > 1.65E-5 | > 1.65E-5     |  |
| HCT-15                          | 0.243     | 1.683 | 1.545                                 | 1.524 | 1.477 | 1.544 | 0.929 | 90   | 89   | 86   | 90   | 48   | 1.45E-5        | > 1.65E-5 | > 1.65E-5     |  |
| HT29                            | 0.153     | 0.626 | 0.622                                 | 0.607 | 0.361 | 0.161 | 0.165 | 99   | 96   | 44   | 2    | 3    | 1.27E-7        | > 1.65E-5 | > 1.65E-5     |  |
| KM12                            | 0.247     | 1.273 | 1.225                                 | 1.253 | 0.683 | 0.704 | 0.472 | 95   | 98   | 43   | 45   | 22   | 1.21E-7        | > 1.65E-5 | > 1.65E-5     |  |
| SW-620                          | 0.205     | 1.204 | 1.093                                 | 1.129 | 0.561 | 0.533 | 0.439 | 89   | 93   | 36   | 33   | 23   | 9.21E-8        | > 1.65E-5 | > 1.65E-5     |  |
| CNS Cancer                      |           |       |                                       |       |       |       |       |      |      |      |      |      |                |           |               |  |
| SF-268                          | 0.389     | 1.189 | 1.118                                 | 1.183 | 0.988 | 0.537 | 0.342 | 91   | 99   | 75   | 19   | -12  | 4.56E-7        | 6.64E-6   | > 1.65E-5     |  |
| SF-295                          | 0.751     | 1.251 | 1.166                                 | 1.174 | 0.913 | 0.884 | 0.489 | 83   | 85   | 32   | 27   | -35  | 7.60E-8        | 4.45E-6   | > 1.65E-5     |  |
| SF-539                          | 0.602     | 1.924 | 1.931                                 | 1.871 | 1.703 | 0.961 | 0.731 | 101  | 96   | 83   | 27   | 10   | 6.46E-7        | > 1.65E-5 | > 1.65E-5     |  |
| SNB-19                          | 0.492     | 1.645 | 1.510                                 | 1.543 | 1.459 | 0.954 | 0.809 | 88   | 91   | 84   | 40   | 28   | 9.78E-7        | > 1.65E-5 | > 1.65E-5     |  |
| SNB-75                          | 0.519     | 1.003 | 0.915                                 | 0.979 | 1.022 | 0.557 | 0.160 | 82   | 95   | 104  | 8    | -69  | 5.99E-7        | 2.08E-6   | 9.29E-6       |  |
| U251                            | 0.273     | 1.184 | 1.153                                 | 0.939 | 0.483 | 0.332 | 0.270 | 97   | 73   | 23   | 6    | -1   | 4.78E-8        | 1.18E-5   | > 1.65E-5     |  |
| Melanoma                        |           |       |                                       |       |       |       |       |      |      |      |      |      |                |           |               |  |
| LOX IMVI                        | 0.105     | 0.588 | 0.599                                 | 0.518 | 0.346 | 0.157 | 0.088 | 102  | 86   | 50   | 11   | -16  | 1.63E-7        | 4.14E-6   | > 1.65E-5     |  |
| MALME-3M                        | 0.844     | 1.496 | 1.379                                 | 1.492 | 1.389 | 1.121 | 0.835 | 82   | 99   | 84   | 43   | -1   | 1.09E-6        | 1.56E-5   | > 1.65E-5     |  |
| M14                             | 0.297     | 1.004 | 0.937                                 | 0.968 | 0.977 | 0.681 | 0.340 | 90   | 95   | 96   | 54   | 6    | 2.02E-6        | > 1.65E-5 | > 1.65E-5     |  |
| MDA-MB-435                      | 0.349     | 1.179 | 1.118                                 | 1.104 | 1.084 | 0.723 | 0.394 | 93   | 91   | 89   | 45   | 5    | 1.27E-6        | > 1.65E-5 | > 1.65E-5     |  |
| SK-MEL-2                        | 0.714     | 1.285 | 1.292                                 | 1.294 | 0.948 | 0.637 | 0.347 | 101  | 102  | 41   | -11  | -51  | 1.17E-7        | 1.02E-6   | 1.52E-5       |  |
| SK-MEL-28                       | 0.451     | 1.302 | 1.242                                 | 1.320 | 1.153 | 0.937 | 0.424 | 93   | 102  | 82   | 57   | -6   | 2.14E-6        | 1.33E-5   | > 1.65E-5     |  |
| SK-MEL-5                        | 0.409     | 2.204 | 2.118                                 | 2.148 | 1.086 | 0.524 | 0.360 | 95   | 97   | 38   | 6    | -12  | 1.02E-7        | 3.65E-6   | > 1.65E-5     |  |
| UACC-257                        | 0.559     | 0.953 | 0.912                                 | 0.929 | 0.888 | 0.579 | 0.376 | 90   | 94   | 83   | 5    | -33  | 4.40E-7        | 2.25E-6   | > 1.65E-5     |  |
| UACC-62                         | 0.662     | 1.886 | 1.768                                 | 1.853 | 1.659 | 1.267 | 0.809 | 90   | 97   | 81   | 49   | 12   | 1.58E-6        | > 1.65E-5 | > 1.65E-5     |  |
| Ovarian Cancer                  |           |       |                                       |       |       |       |       |      |      |      |      |      |                |           |               |  |
| IGROV1                          | 0.479     | 0.901 | 0.801                                 | 0.824 | 0.693 | 0.267 | 0.255 | 76   | 82   | 51   | -44  | -47  | 1.68E-7        | 5.64E-7   | > 1.65E-5     |  |
| OVCA-3                          | 0.536     | 1.288 | 1.224                                 | 1.254 | 1.179 | 0.656 | 0.371 | 91   | 95   | 86   | 16   | -31  | 5.34E-7        | 3.81E-6   | > 1.65E-5     |  |
| OVCA-4                          | 0.347     | 0.563 | 0.522                                 | 0.549 | 0.475 | 0.341 | 0.301 | 81   | 94   | 59   | -2   | -13  | 2.35E-7        | 1.54E-6   | > 1.65E-5     |  |
| OVCA-5                          | 0.488     | 1.171 | 1.111                                 | 1.099 | 1.090 | 0.820 | 0.698 | 91   | 89   | 88   | 49   | 31   | 1.52E-6        | > 1.65E-5 | > 1.65E-5     |  |
| OVCA-8                          | 0.228     | 0.781 | 0.752                                 | 0.700 | 0.701 | 0.502 | 0.253 | 95   | 85   | 86   | 50   | 4    | 1.60E-6        | > 1.65E-5 | > 1.65E-5     |  |
| NCI/ADR-RES                     | 0.283     | 0.933 | 0.968                                 | 0.916 | 0.912 | 0.940 | 0.740 | 105  | 97   | 97   | 101  | 70   | > 1.65E-5      | > 1.65E-5 | > 1.65E-5     |  |
| SK-OV-3                         | 0.460     | 1.080 | 1.048                                 | 1.024 | 1.043 | 0.860 | 0.419 | 95   | 91   | 94   | 64   | -9   | 2.60E-6        | 1.25E-5   | > 1.65E-5     |  |
| Renal Cancer                    |           |       |                                       |       |       |       |       |      |      |      |      |      |                |           |               |  |
| 786-0                           | 0.387     | 1.402 | 1.373                                 | 1.430 | 1.390 | 1.006 | 0.203 | 97   | 103  | 99   | 61   | -48  | 2.08E-6        | 6.01E-6   | > 1.65E-5     |  |
| A498                            | 0.736     | 1.636 | 1.426                                 | 1.467 | 1.383 | 0.922 | 0.177 | 77   | 81   | 72   | 21   | -76  | 4.41E-7        | 2.70E-6   | 8.89E-6       |  |
| ACHN                            | 0.348     | 1.536 | 1.436                                 | 1.416 | 1.437 | 1.217 | 0.465 | 92   | 90   | 92   | 73   | 10   | 3.83E-6        | > 1.65E-5 | > 1.65E-5     |  |
| CAKI-1                          | 0.678     | 0.970 | 0.942                                 | 0.911 | 0.989 | 0.965 | 0.154 | 90   | 80   | 106  | 98   | -77  | 3.11E-6        | 5.99E-6   | 1.15E-5       |  |
| RXF 393                         | 0.649     | 1.251 | 1.162                                 | 1.216 | 1.206 | 0.897 | 0.235 | 85   | 94   | 92   | 41   | -64  | 1.11E-6        | 4.07E-6   | 1.22E-5       |  |
| SN12C                           | 0.519     | 1.800 | 1.706                                 | 1.727 | 1.637 | 1.283 | 0.800 | 93   | 94   | 87   | 60   | 22   | 2.97E-6        | > 1.65E-5 | > 1.65E-5     |  |
| TK-10                           | 0.374     | 0.854 | 0.783                                 | 0.755 | 0.680 | 0.383 | 0.264 | 85   | 79   | 64   | 2    | -29  | 2.74E-7        | 1.88E-6   | > 1.65E-5     |  |
| UO-31                           | 0.569     | 1.186 | 1.080                                 | 1.150 | 1.143 | 1.182 | 0.200 | 83   | 94   | 93   | 99   | -65  | 3.29E-6        | 6.64E-6   | 1.34E-5       |  |
| Prostate Cancer                 |           |       |                                       |       |       |       |       |      |      |      |      |      |                |           |               |  |
| PC-3                            | 0.397     | 1.562 | 1.530                                 | 1.489 | 1.302 | 0.962 | 0.606 | 97   | 94   | 78   | 48   | 18   | 1.47E-6        | > 1.65E-5 | > 1.65E-5     |  |
| DU-145                          | 0.309     | 1.071 | 1.036                                 | 1.073 | 1.052 | 0.886 | 0.331 | 95   | 100  | 98   | 76   | 3    | 3.72E-6        | > 1.65E-5 | > 1.65E-5     |  |
| Breast Cancer                   |           |       |                                       |       |       |       |       |      |      |      |      |      |                |           |               |  |
| MCF7                            | 0.204     | 0.931 | 0.909                                 | 0.917 | 0.644 | 0.523 | 0.257 | 97   | 98   | 60   | 44   | 7    | 7.03E-7        | > 1.65E-5 | > 1.65E-5     |  |
| MDA-MB-231/ATCC                 | 0.449     | 1.112 | 1.041                                 | 1.066 | 0.968 | 0.680 | 0.494 | 89   | 93   | 78   | 35   | 7    | 7.39E-7        | > 1.65E-5 | > 1.65E-5     |  |
| HS 578T                         | 0.514     | 1.153 | 1.124                                 | 1.159 | 1.146 | 0.756 | 0.530 | 95   | 101  | 99   | 38   | 3    | 1.04E-6        | > 1.65E-5 | > 1.65E-5     |  |
| BT-549                          | 0.792     | 1.362 | 1.334                                 | 1.445 | 1.609 | 1.005 | 0.405 | 95   | 115  | 143  | 37   | -49  | 1.25E-6        | 4.47E-6   | > 1.65E-5     |  |
| T-47D                           | 0.443     | 0.919 | 0.870                                 | 0.857 | 0.750 | 0.741 | 0.466 | 90   | 87   | 65   | 63   | 5    | 2.73E-6        | > 1.65E-5 | > 1.65E-5     |  |
| MDA-MB-468                      | 0.536     | 1.371 | 1.282                                 | 1.178 | 0.362 | 0.530 | 0.272 | 89   | 77   | -32  | -1   | -49  | 2.91E-8        | 8.33E-8   | > 1.65E-5     |  |

Table S9. NCI 60-cell line results for 12.

National Cancer Institute Developmental Therapeutics Program  
In-Vitro Testing Results

| NSC : D - 751838 / 1            |       |       | Experiment ID : 0912NS69              |       |       |       |       |      |      |      | Test Type : 08 |      |           |           | Units : Molar |      |
|---------------------------------|-------|-------|---------------------------------------|-------|-------|-------|-------|------|------|------|----------------|------|-----------|-----------|---------------|------|
| Report Date : February 01, 2010 |       |       | Test Date : December 14, 2009         |       |       |       |       |      |      |      | QNS :          |      |           |           | MC :          |      |
| COMI : PC 812 (92197)           |       |       | Stain Reagent : SRB Dual-Pass Related |       |       |       |       |      |      |      | SSPL : K24A    |      |           |           |               |      |
| Log10 Concentration             |       |       |                                       |       |       |       |       |      |      |      |                |      |           |           |               |      |
| Panel/Cell Line                 | Time  | Zero  | Ctrl                                  | -8.7  | -7.7  | -6.7  | -5.7  | -4.7 | -8.7 | -7.7 | -6.7           | -5.7 | -4.7      | GI50      | TGI           | LC50 |
| Leukemia                        |       |       |                                       |       |       |       |       |      |      |      |                |      |           |           |               |      |
| CCRF-CEM                        | 0.349 | 1.710 | 1.620                                 | 1.571 | 1.591 | 1.743 | 1.121 | 93   | 90   | 91   | 102            | 57   | > 2.23E-5 | > 2.23E-5 | > 2.23E-5     |      |
| HL-60(TB)                       | 0.717 | 1.972 | 2.008                                 | 2.016 | 1.959 | 2.086 | 1.020 | 103  | 103  | 99   | 109            | 24   | 1.11E-5   | > 2.23E-5 | > 2.23E-5     |      |
| K-562                           | 0.257 | 1.311 | 1.279                                 | 1.349 | 1.305 | 1.187 | 0.952 | 97   | 104  | 99   | 88             | 66   | > 2.23E-5 | > 2.23E-5 | > 2.23E-5     |      |
| MOLT-4                          | 0.598 | 1.681 | 1.612                                 | 1.689 | 1.695 | 1.723 | 1.120 | 94   | 101  | 101  | 104            | 48   | 2.07E-5   | > 2.23E-5 | > 2.23E-5     |      |
| RPMI-8226                       | 0.685 | 2.244 | 2.262                                 | 2.215 | 2.210 | 2.259 | 1.562 | 101  | 98   | 98   | 101            | 56   | > 2.23E-5 | > 2.23E-5 | > 2.23E-5     |      |
| Non-Small Cell Lung Cancer      |       |       |                                       |       |       |       |       |      |      |      |                |      |           |           |               |      |
| A549/ATCC                       | 0.353 | 1.063 | 1.069                                 | 1.058 | 1.071 | 1.035 | 0.652 | 101  | 99   | 101  | 96             | 42   | 1.59E-5   | > 2.23E-5 | > 2.23E-5     |      |
| EKVX                            | 0.633 | 1.554 | 1.573                                 | 1.432 | 1.463 | 1.477 | 1.392 | 102  | 87   | 90   | 92             | 82   | > 2.23E-5 | > 2.23E-5 | > 2.23E-5     |      |
| HOP-62                          | 0.259 | 0.792 | 0.773                                 | 0.768 | 0.768 | 0.746 | 0.629 | 96   | 96   | 95   | 91             | 69   | > 2.23E-5 | > 2.23E-5 | > 2.23E-5     |      |
| HOP-92                          | 1.146 | 2.045 | 1.941                                 | 1.875 | 1.892 | 1.901 | 1.954 | 88   | 81   | 83   | 84             | 90   | > 2.23E-5 | > 2.23E-5 | > 2.23E-5     |      |
| NCI-H226                        | 0.670 | 1.448 | 1.364                                 | 1.428 | 1.338 | 1.371 | 1.355 | 89   | 97   | 86   | 90             | 88   | > 2.23E-5 | > 2.23E-5 | > 2.23E-5     |      |
| NCI-H23                         | 0.402 | 1.274 | 1.227                                 | 1.218 | 1.197 | 1.191 | 0.792 | 95   | 94   | 91   | 90             | 45   | 1.71E-5   | > 2.23E-5 | > 2.23E-5     |      |
| NCI-H322M                       | 0.461 | 0.894 | 0.847                                 | 0.892 | 0.892 | 0.940 | 0.843 | 89   | 99   | 100  | 111            | 88   | > 2.23E-5 | > 2.23E-5 | > 2.23E-5     |      |
| NCI-H460                        | 0.241 | 1.866 | 1.911                                 | 1.891 | 1.912 | 1.782 | 0.750 | 103  | 102  | 103  | 95             | 31   | 1.13E-5   | > 2.23E-5 | > 2.23E-5     |      |
| NCI-H522                        | 0.593 | 0.802 | 0.738                                 | 0.752 | 0.751 | 0.751 | 0.371 | 69   | 76   | 75   | 75             | -38  | 3.75E-6   | 1.04E-5   | > 2.23E-5     |      |
| Colon Cancer                    |       |       |                                       |       |       |       |       |      |      |      |                |      |           |           |               |      |
| COLO 205                        | 0.195 | 1.210 | 1.211                                 | 1.229 | 1.150 | 1.062 | 0.522 | 100  | 102  | 94   | 85             | 32   | 1.03E-5   | > 2.23E-5 | > 2.23E-5     |      |
| HCC-2998                        | 0.747 | 1.727 | 1.758                                 | 1.688 | 1.678 | 1.706 | 0.880 | 103  | 96   | 95   | 98             | 14   | 8.24E-6   | > 2.23E-5 | > 2.23E-5     |      |
| HCT-116                         | 0.239 | 1.640 | 1.542                                 | 1.598 | 1.585 | 1.658 | 0.627 | 93   | 97   | 96   | 101            | 28   | 1.11E-5   | > 2.23E-5 | > 2.23E-5     |      |
| HCT-15                          | 0.243 | 1.573 | 1.635                                 | 1.422 | 1.494 | 1.476 | 1.549 | 105  | 89   | 94   | 93             | 98   | > 2.23E-5 | > 2.23E-5 | > 2.23E-5     |      |
| HT29                            | 0.153 | 0.553 | 0.532                                 | 0.561 | 0.550 | 0.513 | 0.300 | 95   | 102  | 99   | 90             | 37   | 1.26E-5   | > 2.23E-5 | > 2.23E-5     |      |
| KM12                            | 0.247 | 1.278 | 1.203                                 | 1.242 | 1.194 | 1.255 | 0.834 | 93   | 97   | 92   | 98             | 57   | > 2.23E-5 | > 2.23E-5 | > 2.23E-5     |      |
| SW-620                          | 0.205 | 1.218 | 1.103                                 | 1.155 | 1.055 | 1.107 | 0.627 | 89   | 94   | 84   | 89             | 42   | 1.49E-5   | > 2.23E-5 | > 2.23E-5     |      |
| CNS Cancer                      |       |       |                                       |       |       |       |       |      |      |      |                |      |           |           |               |      |
| SF-268                          | 0.389 | 1.292 | 1.222                                 | 1.235 | 1.193 | 1.180 | 0.987 | 92   | 94   | 89   | 88             | 66   | > 2.23E-5 | > 2.23E-5 | > 2.23E-5     |      |
| SF-295                          | 0.751 | 1.284 | 1.236                                 | 1.230 | 1.272 | 1.199 | 0.726 | 91   | 90   | 98   | 84             | -3   | 5.46E-6   | 2.04E-5   | > 2.23E-5     |      |
| SF-539                          | 0.602 | 1.958 | 1.829                                 | 1.829 | 1.787 | 1.894 | 1.869 | 90   | 90   | 87   | 95             | 93   | > 2.23E-5 | > 2.23E-5 | > 2.23E-5     |      |
| SNB-19                          | 0.492 | 1.609 | 1.544                                 | 1.594 | 1.487 | 1.583 | 1.397 | 94   | 99   | 89   | 98             | 81   | > 2.23E-5 | > 2.23E-5 | > 2.23E-5     |      |
| SNB-75                          | 0.519 | 1.012 | 0.912                                 | 0.942 | 0.910 | 0.937 | 1.033 | 80   | 86   | 79   | 85             | 104  | > 2.23E-5 | > 2.23E-5 | > 2.23E-5     |      |
| U251                            | 0.273 | 1.142 | 1.125                                 | 1.103 | 1.124 | 1.088 | 0.525 | 98   | 95   | 98   | 94             | 29   | 1.06E-5   | > 2.23E-5 | > 2.23E-5     |      |
| Melanoma                        |       |       |                                       |       |       |       |       |      |      |      |                |      |           |           |               |      |
| LOX IMVI                        | 0.105 | 0.641 | 0.542                                 | 0.568 | 0.567 | 0.607 | 0.081 | 81   | 86   | 86   | 94             | -23  | 5.26E-6   | 1.41E-5   | > 2.23E-5     |      |
| MALME-3M                        | 0.844 | 1.528 | 1.315                                 | 1.431 | 1.378 | 1.393 | 1.377 | 69   | 86   | 78   | 80             | 78   | > 2.23E-5 | > 2.23E-5 | > 2.23E-5     |      |
| M14                             | 0.297 | 0.994 | 0.927                                 | 0.954 | 0.937 | 0.949 | 0.915 | 90   | 94   | 92   | 94             | 89   | > 2.23E-5 | > 2.23E-5 | > 2.23E-5     |      |
| MDA-MB-435                      | 0.349 | 1.201 | 1.136                                 | 1.161 | 1.144 | 1.219 | 0.957 | 92   | 95   | 93   | 102            | 71   | > 2.23E-5 | > 2.23E-5 | > 2.23E-5     |      |
| SK-MEL-2                        | 0.714 | 0.999 | 0.992                                 | 1.010 | 0.962 | 1.014 | 0.692 | 97   | 104  | 87   | 105            | -3   | 7.20E-6   | 2.09E-5   | > 2.23E-5     |      |
| SK-MEL-28                       | 0.451 | 1.331 | 1.300                                 | 1.335 | 1.301 | 1.371 | 1.168 | 97   | 100  | 97   | 105            | 81   | > 2.23E-5 | > 2.23E-5 | > 2.23E-5     |      |
| SK-MEL-5                        | 0.409 | 2.236 | 2.047                                 | 2.200 | 2.127 | 2.058 | 0.875 | 90   | 98   | 94   | 90             | 25   | 9.33E-6   | > 2.23E-5 | > 2.23E-5     |      |
| UACC-257                        | 0.559 | 0.945 | 0.946                                 | 0.908 | 0.894 | 0.948 | 0.791 | 100  | 90   | 87   | 101            | 60   | > 2.23E-5 | > 2.23E-5 | > 2.23E-5     |      |
| UACC-62                         | 0.662 | 2.012 | 1.887                                 | 1.936 | 1.798 | 1.849 | 1.547 | 91   | 94   | 84   | 88             | 66   | > 2.23E-5 | > 2.23E-5 | > 2.23E-5     |      |
| Ovarian Cancer                  |       |       |                                       |       |       |       |       |      |      |      |                |      |           |           |               |      |
| IGROV1                          | 0.479 | 0.889 | 0.822                                 | 0.877 | 0.794 | 0.780 | 0.671 | 84   | 97   | 77   | 73             | 47   | 1.69E-5   | > 2.23E-5 | > 2.23E-5     |      |
| OVCAR-3                         | 0.536 | 1.356 | 1.296                                 | 1.322 | 1.296 | 1.275 | 1.299 | 93   | 96   | 93   | 90             | 93   | > 2.23E-5 | > 2.23E-5 | > 2.23E-5     |      |
| OVCAR-4                         | 0.347 | 0.599 | 0.584                                 | 0.602 | 0.587 | 0.578 | 0.514 | 94   | 101  | 95   | 92             | 66   | > 2.23E-5 | > 2.23E-5 | > 2.23E-5     |      |
| OVCAR-5                         | 0.488 | 1.177 | 1.129                                 | 1.079 | 1.026 | 1.134 | 1.058 | 93   | 86   | 78   | 94             | 83   | > 2.23E-5 | > 2.23E-5 | > 2.23E-5     |      |
| OVCAR-8                         | 0.228 | 0.740 | 0.764                                 | 0.708 | 0.720 | 0.731 | 0.685 | 105  | 94   | 96   | 98             | 89   | > 2.23E-5 | > 2.23E-5 | > 2.23E-5     |      |
| NCI/ADR-RES                     | 0.283 | 0.940 | 0.936                                 | 0.923 | 0.920 | 0.869 | 0.928 | 99   | 97   | 97   | 89             | 98   | > 2.23E-5 | > 2.23E-5 | > 2.23E-5     |      |
| SK-OV-3                         | 0.460 | 1.035 | 0.987                                 | 0.982 | 0.989 | 0.951 | 1.090 | 92   | 91   | 92   | 85             | 110  | > 2.23E-5 | > 2.23E-5 | > 2.23E-5     |      |
| Renal Cancer                    |       |       |                                       |       |       |       |       |      |      |      |                |      |           |           |               |      |
| 786-O                           | 0.387 | 1.439 | 1.398                                 | 1.435 | 1.431 | 1.456 | 1.430 | 96   | 100  | 99   | 102            | 99   | > 2.23E-5 | > 2.23E-5 | > 2.23E-5     |      |
| A498                            | 0.736 | 1.432 | 1.279                                 | 1.320 | 1.255 | 1.277 | 1.247 | 78   | 84   | 75   | 78             | 73   | > 2.23E-5 | > 2.23E-5 | > 2.23E-5     |      |
| ACHN                            | 0.348 | 1.550 | 1.504                                 | 1.480 | 1.419 | 1.468 | 1.182 | 96   | 94   | 89   | 93             | 69   | > 2.23E-5 | > 2.23E-5 | > 2.23E-5     |      |
| CAKI-1                          | 0.678 | 1.038 | 1.007                                 | 0.988 | 0.939 | 1.077 | 1.034 | 91   | 86   | 73   | 111            | 99   | > 2.23E-5 | > 2.23E-5 | > 2.23E-5     |      |
| RXF 393                         | 0.649 | 1.230 | 1.155                                 | 1.176 | 1.161 | 1.183 | 1.182 | 87   | 91   | 88   | 92             | 92   | > 2.23E-5 | > 2.23E-5 | > 2.23E-5     |      |
| SN12C                           | 0.519 | 1.912 | 1.792                                 | 1.815 | 1.752 | 1.756 | 1.703 | 91   | 93   | 88   | 89             | 85   | > 2.23E-5 | > 2.23E-5 | > 2.23E-5     |      |
| TK-10                           | 0.374 | 0.529 | 0.515                                 | 0.514 | 0.522 | 0.511 | 0.377 | 91   | 90   | 95   | 88             | 2    | 6.20E-6   | > 2.23E-5 | > 2.23E-5     |      |
| UO-31                           | 0.569 | 1.188 | 1.110                                 | 1.108 | 1.095 | 1.049 | 1.117 | 87   | 87   | 85   | 78             | 89   | > 2.23E-5 | > 2.23E-5 | > 2.23E-5     |      |
| Prostate Cancer                 |       |       |                                       |       |       |       |       |      |      |      |                |      |           |           |               |      |
| PC-3                            | 0.397 | 1.621 | 1.570                                 | 1.534 | 1.495 | 1.524 | 1.248 | 96   | 93   | 90   | 92             | 70   | > 2.23E-5 | > 2.23E-5 | > 2.23E-5     |      |
| DU-145                          | 0.309 | 1.123 | 1.062                                 | 1.157 | 1.084 | 1.072 | 0.994 | 93   | 104  | 95   | 94             | 84   | > 2.23E-5 | > 2.23E-5 | > 2.23E-5     |      |
| Breast Cancer                   |       |       |                                       |       |       |       |       |      |      |      |                |      |           |           |               |      |
| MCF7                            | 0.204 | 1.049 | 0.971                                 | 1.018 | 1.011 | 1.077 | 0.692 | 91   | 96   | 96   | 103            | 58   | > 2.23E-5 | > 2.23E-5 | > 2.23E-5     |      |
| MDA-MB-231/ATCC                 | 0.449 | 1.138 | 1.073                                 | 1.133 | 1.058 | 1.033 | 0.921 | 91   | 99   | 88   | 85             | 68   | > 2.23E-5 | > 2.23E-5 | > 2.23E-5     |      |
| HS 578T                         | 0.514 | 1.108 | 1.057                                 | 1.092 | 1.043 | 1.046 | 1.028 | 91   | 97   | 89   | 89             | 86   | > 2.23E-5 | > 2.23E-5 | > 2.23E-5     |      |
| BT-549                          | 0.792 | 1.372 | 1.355                                 | 1.378 | 1.362 | 1.404 | 1.449 | 97   | 101  | 98   | 105            | 113  | > 2.23E-5 | > 2.23E-5 | > 2.23E-5     |      |
| T-47D                           | 0.443 | 0.940 | 0.904                                 | 0.925 | 0.916 | 0.933 | 0.880 | 93   | 97   | 95   | 99             | 88   | > 2.23E-5 | > 2.23E-5 | > 2.23E-5     |      |
| MDA-MB-468                      | 0.536 | 1.361 | 1.255                                 | 1.336 | 1.247 | 0.994 | 0.487 | 87   | 97   | 86   | 56             | -9   | 2.71E-6   | 1.61E-5   | > 2.23E-5     |      |

Table S10. NCI 60-cell line results for 13.

National Cancer Institute Developmental Therapeutics Program  
In-Vitro Testing Results

| NSC : D - 751839 / 1            |       |                        | Experiment ID : 0912NS69              |       |       |       |       |                |      |      |      |      | Test Type : 08 |           |           | Units : Molar |  |
|---------------------------------|-------|------------------------|---------------------------------------|-------|-------|-------|-------|----------------|------|------|------|------|----------------|-----------|-----------|---------------|--|
| Report Date : February 01, 2010 |       |                        | Test Date : December 14, 2009         |       |       |       |       |                |      |      |      |      | QNS :          |           |           | MC :          |  |
| COMI : PC 1009 (92198)          |       |                        | Stain Reagent : SRB Dual-Pass Related |       |       |       |       |                |      |      |      |      | SSPL : K24A    |           |           |               |  |
| Log10 Concentration             |       |                        |                                       |       |       |       |       |                |      |      |      |      |                |           |           |               |  |
| Panel/Cell Line                 | Time  | Mean Optical Densities |                                       |       |       |       |       | Percent Growth |      |      |      |      |                | GI50      | TGI       | LC50          |  |
|                                 | Zero  | Ctrl                   | -8.7                                  | -7.7  | -6.7  | -5.7  | -4.7  | -8.7           | -7.7 | -6.7 | -5.7 | -4.7 |                |           |           |               |  |
| Leukemia                        |       |                        |                                       |       |       |       |       |                |      |      |      |      |                |           |           |               |  |
| CCRF-CEM                        | 0.349 | 1.583                  | 1.605                                 | 1.458 | 0.599 | 0.542 | 0.524 | 102            | 90   | 20   | 16   | 14   | 7.78E-8        | > 2.08E-5 | > 2.08E-5 |               |  |
| HL-60(TB)                       | 0.717 | 2.326                  | 2.137                                 | 2.052 | 0.585 | 0.491 | 0.482 | 88             | 83   | -18  | -32  | -33  | 4.40E-8        | 1.37E-7   | > 2.08E-5 |               |  |
| K-562                           | 0.257 | 1.337                  | 1.141                                 | 1.088 | 0.736 | 0.544 | 0.271 | 82             | 77   | 44   | 27   | 1    | 1.40E-7        | > 2.08E-5 | > 2.08E-5 |               |  |
| MOLT-4                          | 0.598 | 1.723                  | 1.731                                 | 1.533 | 0.977 | 0.656 | 0.516 | 101            | 83   | 34   | 5    | -14  | 9.70E-8        | 3.89E-6   | > 2.08E-5 |               |  |
| RPMI-8226                       | 0.685 | 2.244                  | 2.228                                 | 2.043 | 0.967 | 0.763 | 0.683 | 99             | 87   | 18   | 5    | .    | 7.17E-8        | 1.83E-5   | > 2.08E-5 |               |  |
| Non-Small Cell Lung Cancer      |       |                        |                                       |       |       |       |       |                |      |      |      |      |                |           |           |               |  |
| A549/ATCC                       | 0.353 | 1.074                  | 1.118                                 | 0.820 | 0.279 | 0.251 | 0.247 | 106            | 65   | -21  | -29  | -30  | 3.09E-8        | 1.18E-7   | > 2.08E-5 |               |  |
| EKVX                            | 0.633 | 1.567                  | 1.656                                 | 1.573 | 0.728 | 0.635 | 0.470 | 110            | 101  | 10   | .    | -26  | 7.55E-8        | 2.12E-6   | > 2.08E-5 |               |  |
| HOP-62                          | 0.259 | 0.766                  | 0.827                                 | 0.790 | 0.231 | 0.197 | 0.164 | 112            | 105  | -11  | -24  | -37  | 6.20E-8        | 1.68E-7   | > 2.08E-5 |               |  |
| HOP-92                          | 1.146 | 1.967                  | 1.941                                 | 1.966 | 0.487 | 0.669 | 0.872 | 97             | 100  | -58  | -42  | -24  | 4.31E-8        | 8.97E-8   | .         |               |  |
| NCI-H226                        | 0.670 | 1.461                  | 1.414                                 | 1.351 | 0.793 | 0.644 | 0.576 | 94             | 86   | 16   | -4   | -14  | 6.75E-8        | 1.31E-6   | > 2.08E-5 |               |  |
| NCI-H23                         | 0.402 | 1.268                  | 1.236                                 | 1.245 | 0.663 | 0.563 | 0.472 | 96             | 97   | 30   | 19   | 8    | 1.05E-7        | > 2.08E-5 | > 2.08E-5 |               |  |
| NCI-H322M                       | 0.461 | 0.875                  | 0.910                                 | 0.856 | 0.604 | 0.519 | 0.446 | 108            | 96   | 34   | 14   | -3   | 1.16E-7        | 1.33E-5   | > 2.08E-5 |               |  |
| NCI-H460                        | 0.241 | 2.027                  | 1.862                                 | 1.200 | 0.453 | 0.353 | 0.191 | 91             | 54   | 12   | 6    | -21  | 2.54E-8        | 3.53E-6   | > 2.08E-5 |               |  |
| NCI-H522                        | 0.593 | 1.325                  | 1.314                                 | 1.263 | 0.591 | 0.260 | 0.201 | 98             | 92   | .    | -56  | -66  | 5.89E-8        | 2.06E-7   | 1.61E-6   |               |  |
| Colon Cancer                    |       |                        |                                       |       |       |       |       |                |      |      |      |      |                |           |           |               |  |
| COLO 205                        | 0.195 | 1.172                  | 1.162                                 | 0.804 | 0.214 | 0.307 | 0.336 | 99             | 62   | 2    | 11   | 14   | 3.32E-8        | > 2.08E-5 | > 2.08E-5 |               |  |
| HCC-2998                        | 0.747 | 1.716                  | 1.750                                 | 1.620 | 0.621 | 0.395 | 0.210 | 103            | 90   | -17  | -47  | -72  | 4.93E-8        | 1.45E-7   | 2.70E-6   |               |  |
| HCT-116                         | 0.239 | 1.618                  | 1.584                                 | 1.379 | 0.555 | 0.394 | 0.292 | 98             | 83   | 23   | 11   | 4    | 7.33E-8        | > 2.08E-5 | > 2.08E-5 |               |  |
| HCT-15                          | 0.243 | 1.683                  | 1.584                                 | 1.569 | 1.402 | 0.644 | 0.444 | 93             | 92   | 80   | 28   | 14   | 7.89E-7        | > 2.08E-5 | > 2.08E-5 |               |  |
| HT29                            | 0.153 | 0.626                  | 0.610                                 | 0.440 | 0.140 | 0.107 | 0.123 | 97             | 61   | -9   | -30  | -20  | 2.96E-8        | 1.55E-7   | > 2.08E-5 |               |  |
| KM12                            | 0.247 | 1.273                  | 1.233                                 | 1.112 | 0.673 | 0.496 | 0.349 | 96             | 84   | 42   | 24   | 10   | 1.32E-7        | > 2.08E-5 | > 2.08E-5 |               |  |
| SW-620                          | 0.205 | 1.204                  | 1.118                                 | 0.817 | 0.399 | 0.292 | 0.273 | 91             | 61   | 19   | 9    | 7    | 3.87E-8        | > 2.08E-5 | > 2.08E-5 |               |  |
| CNS Cancer                      |       |                        |                                       |       |       |       |       |                |      |      |      |      |                |           |           |               |  |
| SF-268                          | 0.389 | 1.189                  | 1.170                                 | 1.125 | 0.249 | 0.211 | 0.245 | 98             | 92   | -36  | -46  | -37  | 4.42E-8        | 1.09E-7   | > 2.08E-5 |               |  |
| SF-295                          | 0.751 | 1.251                  | 1.212                                 | 1.129 | 0.446 | 0.350 | 0.315 | 92             | 76   | -41  | -53  | -58  | 3.45E-8        | 9.29E-8   | 1.11E-6   |               |  |
| SF-539                          | 0.602 | 1.924                  | 1.894                                 | 1.920 | 0.740 | 0.581 | 0.418 | 98             | 100  | 10   | -3   | -31  | 7.49E-8        | 1.17E-6   | > 2.08E-5 |               |  |
| SNB-19                          | 0.492 | 1.645                  | 1.560                                 | 1.417 | 0.868 | 0.724 | 0.676 | 93             | 80   | 33   | 20   | 16   | 8.97E-8        | > 2.08E-5 | > 2.08E-5 |               |  |
| SNB-75                          | 0.519 | 1.003                  | 0.937                                 | 0.858 | 0.080 | 0.045 | 0.090 | 86             | 70   | -85  | -91  | -83  | 2.80E-8        | 5.90E-8   | 1.24E-7   |               |  |
| U251                            | 0.273 | 1.184                  | 1.134                                 | 0.937 | 0.243 | 0.196 | 0.212 | 95             | 73   | -11  | -28  | -22  | 3.90E-8        | 1.54E-7   | > 2.08E-5 |               |  |
| Melanoma                        |       |                        |                                       |       |       |       |       |                |      |      |      |      |                |           |           |               |  |
| LOX IMVI                        | 0.105 | 0.588                  | 0.534                                 | 0.181 | 0.099 | 0.101 | 0.066 | 89             | 16   | -6   | -4   | -38  | 7.06E-9        | 1.12E-7   | > 2.08E-5 |               |  |
| MALME-3M                        | 0.844 | 1.496                  | 1.446                                 | 1.455 | 0.742 | 0.671 | 0.617 | 92             | 94   | -12  | -20  | -27  | 5.39E-8        | 1.60E-7   | > 2.08E-5 |               |  |
| M14                             | 0.297 | 1.004                  | 0.981                                 | 0.942 | 0.356 | 0.266 | 0.161 | 97             | 91   | 8    | -10  | -46  | 6.54E-8        | 5.79E-7   | > 2.08E-5 |               |  |
| MDA-MB-435                      | 0.349 | 1.179                  | 1.160                                 | 1.032 | 0.471 | 0.379 | 0.300 | 98             | 82   | 15   | 4    | -14  | 6.25E-8        | 3.32E-6   | > 2.08E-5 |               |  |
| SK-MEL-2                        | 0.714 | 1.285                  | 1.355                                 | 1.171 | 0.411 | 0.236 | 0.192 | 112            | 80   | -42  | -67  | -73  | 3.66E-8        | 9.37E-8   | 4.22E-7   |               |  |
| SK-MEL-28                       | 0.451 | 1.302                  | 1.321                                 | 1.247 | 0.387 | 0.323 | 0.340 | 102            | 94   | -14  | -28  | -25  | 5.28E-8        | 1.54E-7   | > 2.08E-5 |               |  |
| SK-MEL-5                        | 0.409 | 2.204                  | 2.157                                 | 2.021 | 0.501 | 0.285 | 0.048 | 97             | 90   | 5    | -30  | -88  | 6.13E-8        | 2.89E-7   | 4.53E-6   |               |  |
| UACC-257                        | 0.559 | 0.953                  | 0.938                                 | 0.868 | 0.386 | 0.335 | 0.311 | 96             | 78   | -31  | -40  | -44  | 3.78E-8        | 1.08E-7   | > 2.08E-5 |               |  |
| UACC-62                         | 0.662 | 1.886                  | 1.844                                 | 1.731 | 1.100 | 0.845 | 0.385 | 97             | 87   | 36   | 15   | -42  | 1.10E-7        | 3.81E-6   | > 2.08E-5 |               |  |
| Ovarian Cancer                  |       |                        |                                       |       |       |       |       |                |      |      |      |      |                |           |           |               |  |
| IGROV1                          | 0.479 | 0.901                  | 0.899                                 | 0.777 | 0.210 | 0.237 | 0.197 | 100            | 71   | -56  | -51  | -59  | 3.02E-8        | 7.50E-8   | 1.86E-7   |               |  |
| OVCAR-3                         | 0.536 | 1.288                  | 1.326                                 | 1.266 | 0.319 | 0.247 | 0.216 | 105            | 97   | -40  | -54  | -60  | 4.57E-8        | 1.06E-7   | 1.05E-6   |               |  |
| OVCAR-4                         | 0.347 | 0.563                  | 0.552                                 | 0.494 | 0.284 | 0.254 | 0.281 | 95             | 68   | -18  | -27  | -19  | 3.36E-8        | 1.28E-7   | > 2.08E-5 |               |  |
| OVCAR-5                         | 0.488 | 1.171                  | 1.139                                 | 1.195 | 0.767 | 0.641 | 0.671 | 95             | 104  | 41   | 22   | 27   | 1.48E-7        | > 2.08E-5 | > 2.08E-5 |               |  |
| OVCAR-8                         | 0.228 | 0.781                  | 0.736                                 | 0.741 | 0.372 | 0.263 | 0.143 | 92             | 93   | 26   | 6    | -37  | 9.10E-8        | 2.89E-6   | > 2.08E-5 |               |  |
| NCI/ADR-RES                     | 0.283 | 0.933                  | 0.950                                 | 0.917 | 0.800 | 0.514 | 0.368 | 103            | 98   | 80   | 35   | 13   | 9.75E-7        | > 2.08E-5 | > 2.08E-5 |               |  |
| SK-OV-3                         | 0.460 | 1.080                  | 1.076                                 | 1.093 | 0.407 | 0.356 | 0.268 | 99             | 102  | -12  | -23  | -42  | 5.97E-8        | 1.65E-7   | > 2.08E-5 |               |  |
| Renal Cancer                    |       |                        |                                       |       |       |       |       |                |      |      |      |      |                |           |           |               |  |
| 786-0                           | 0.387 | 1.402                  | 1.397                                 | 1.259 | 0.312 | 0.189 | 0.175 | 100            | 86   | -19  | -51  | -55  | 4.56E-8        | 1.36E-7   | 1.89E-6   |               |  |
| A498                            | 0.736 | 1.636                  | 1.290                                 | 1.111 | 0.141 | 0.129 | 0.185 | 62             | 42   | -81  | -83  | -75  | 7.89E-9        | 4.55E-8   | 1.16E-7   |               |  |
| ACHN                            | 0.348 | 1.536                  | 1.532                                 | 1.489 | 0.637 | 0.415 | 0.481 | 100            | 96   | 24   | 6    | 11   | 9.12E-8        | > 2.08E-5 | > 2.08E-5 |               |  |
| CAKI-1                          | 0.678 | 0.970                  | 0.972                                 | 1.041 | 0.296 | 0.122 | 0.211 | 101            | 124  | -56  | -82  | -69  | 5.36E-8        | 1.01E-7   | 1.92E-7   |               |  |
| RXF 393                         | 0.649 | 1.251                  | 1.203                                 | 1.156 | 0.287 | 0.246 | 0.076 | 92             | 84   | -56  | -62  | -88  | 3.65E-8        | 8.30E-8   | 1.89E-7   |               |  |
| SN12C                           | 0.519 | 1.800                  | 1.901                                 | 1.728 | 1.028 | 0.756 | 0.634 | 108            | 94   | 40   | 18   | 9    | 1.35E-7        | > 2.08E-5 | > 2.08E-5 |               |  |
| TK-10                           | 0.374 | 0.854                  | 0.871                                 | 0.817 | 0.282 | 0.162 | 0.133 | 103            | 92   | -25  | -57  | -64  | 4.78E-8        | 1.28E-7   | 1.29E-6   |               |  |
| UO-31                           | 0.569 | 1.186                  | 1.145                                 | 1.124 | 0.515 | 0.152 | 0.228 | 93             | 90   | -10  | -73  | -60  | 5.24E-8        | 1.67E-7   | 8.95E-7   |               |  |
| Prostate Cancer                 |       |                        |                                       |       |       |       |       |                |      |      |      |      |                |           |           |               |  |
| PC-3                            | 0.397 | 1.562                  | 1.569                                 | 1.464 | 0.836 | 0.587 | 0.485 | 101            | 92   | 38   | 16   | 8    | 1.23E-7        | > 2.08E-5 | > 2.08E-5 |               |  |
| DU-145                          | 0.309 | 1.071                  | 1.100                                 | 1.044 | 0.409 | 0.343 | 0.272 | 104            | 96   | 13   | 4    | -12  | 7.50E-8        | 3.84E-6   | > 2.08E-5 |               |  |
| Breast Cancer                   |       |                        |                                       |       |       |       |       |                |      |      |      |      |                |           |           |               |  |
| MCF7                            | 0.204 | 0.931                  | 0.909                                 | 0.663 | 0.336 | 0.293 | 0.235 | 97             | 63   | 18   | 12   | 4    | 4.06E-8        | > 2.08E-5 | > 2.08E-5 |               |  |
| MDA-MB-231/ATCC                 | 0.449 | 1.112                  | 1.138                                 | 1.063 | 0.621 | 0.508 | 0.388 | 104            | 93   | 26   | 9    | -14  | 9.04E-8        | 5.15E-6   | > 2.08E-5 |               |  |
| HS 578T                         | 0.514 | 1.153                  | 1.275                                 | 1.213 | 0.477 | 0.397 | 0.287 | 119            | 109  | -7   | -23  | -44  | 6.72E-8        | 1.80E-7   | > 2.08E-5 |               |  |
| BT-549                          | 0.792 | 1.362                  | 1.373                                 | 1.362 | 0.147 | 0.082 | 0.063 | 102            | 100  | -81  | -90  | -92  | 3.92E-8        | 7.40E-8   | 1.40E-7   |               |  |
| T-47D                           | 0.443 | 0.919                  | 0.912                                 | 0.902 | 0.563 | 0.508 | 0.408 | 99             | 96   | 25   | 14   | -8   | 9.34E-8        | 8.84E-6   | > 2.08E-5 |               |  |
| MDA-MB-468                      | 0.536 | 1.371                  | 1.318                                 | 1.033 | 0.219 | 0.202 | 0.193 | 94             | 59   | -59  | -62  | -64  | 2.50E-8        | 6.60E-8   | 1.74E-7   |               |  |

Table S11. NCI 60-cell line results for 14.

**National Cancer Institute Developmental Therapeutics Program  
In-Vitro Testing Results**

| NSC : D - 662466 / 1            |           |       | Experiment ID : 9306NS84              |       |       |       |       |      |      |      |      |      | Test Type : 08 |           | Units : Molar |  |
|---------------------------------|-----------|-------|---------------------------------------|-------|-------|-------|-------|------|------|------|------|------|----------------|-----------|---------------|--|
| Report Date : February 04, 2010 |           |       | Test Date : June 28, 1993             |       |       |       |       |      |      |      |      |      | QNS :          |           | MC :          |  |
| COMI : PC#278                   |           |       | Stain Reagent : SRB Dual-Pass Related |       |       |       |       |      |      |      |      |      | SSPL : K24A    |           |               |  |
| Log10 Concentration             |           |       |                                       |       |       |       |       |      |      |      |      |      |                |           |               |  |
| Panel/Cell Line                 | Time Zero | Ctrl  | -9.0                                  | -8.0  | -7.0  | -6.0  | -5.0  | -9.0 | -8.0 | -7.0 | -6.0 | -5.0 | GI50           | TGI       | LC50          |  |
| Leukemia                        |           |       |                                       |       |       |       |       |      |      |      |      |      |                |           |               |  |
| CCRF-CEM                        | 0.347     | 1.173 | 1.224                                 | 1.219 | 1.271 | 1.155 | 0.357 | 106  | 106  | 112  | 98   | 1    | 3.13E-6        | > 1.00E-5 | > 1.00E-5     |  |
| K-562                           | 0.213     | 1.367 | 1.412                                 | 1.429 | 1.273 | 1.226 | 0.466 | 104  | 105  | 92   | 88   | 22   | 3.75E-6        | > 1.00E-5 | > 1.00E-5     |  |
| MOLT-4                          | 0.393     | 1.349 | 1.365                                 | 1.396 | 1.427 | 1.386 | 0.568 | 102  | 105  | 108  | 104  | 18   | 4.26E-6        | > 1.00E-5 | > 1.00E-5     |  |
| RPMI-8226                       | 0.413     | 1.447 | 1.459                                 | 1.414 | 1.546 | 1.412 | 0.410 | 101  | 97   | 110  | 97   | -1   | 3.01E-6        | 9.80E-6   | > 1.00E-5     |  |
| Non-Small Cell Lung Cancer      |           |       |                                       |       |       |       |       |      |      |      |      |      |                |           |               |  |
| A549/ATCC                       | 0.416     | 1.807 | 1.824                                 | 1.800 | 1.690 | 1.688 | 0.572 | 101  | 100  | 92   | 91   | 11   | 3.29E-6        | > 1.00E-5 | > 1.00E-5     |  |
| EKVX                            | 0.621     | 1.597 | 1.516                                 | 1.556 | 1.571 | 1.527 | 0.760 | 92   | 96   | 97   | 93   | 14   | 3.50E-6        | > 1.00E-5 | > 1.00E-5     |  |
| HOP-62                          | 0.608     | 1.453 | 1.413                                 | 1.385 | 1.431 | 1.493 | 0.655 | 95   | 92   | 98   | 105  | 6    | 3.57E-6        | > 1.00E-5 | > 1.00E-5     |  |
| HOP-92                          | 0.668     | 1.039 | 1.090                                 | 1.120 | 1.021 | 1.074 | 0.545 | 114  | 122  | 95   | 109  | -19  | 2.91E-6        | 7.17E-6   | > 1.00E-5     |  |
| NCI-H226                        | 0.612     | 1.284 | 1.291                                 | 1.336 | 1.333 | 1.331 | 0.913 | 101  | 108  | 107  | 107  | 45   | 8.26E-6        | > 1.00E-5 | > 1.00E-5     |  |
| NCI-H23                         | 0.478     | 1.248 | 1.236                                 | 1.305 | 1.327 | 1.271 | 0.845 | 99   | 107  | 110  | 103  | 48   | 9.08E-6        | > 1.00E-5 | > 1.00E-5     |  |
| NCI-H322M                       | 0.636     | 1.493 | 1.493                                 | 1.456 | 1.460 | 1.524 | 1.165 | 100  | 96   | 96   | 104  | 62   | > 1.00E-5      | > 1.00E-5 | > 1.00E-5     |  |
| NCI-H460                        | 0.253     | 1.144 | 1.217                                 | 1.165 | 1.313 | 1.217 | 0.292 | 108  | 102  | 119  | 108  | 4    | 3.64E-6        | > 1.00E-5 | > 1.00E-5     |  |
| NCI-H522                        | 0.505     | 1.466 | 1.319                                 | 1.432 | 1.467 | 1.473 | 0.486 | 85   | 97   | 100  | 101  | -4   | 3.06E-6        | 9.20E-6   | > 1.00E-5     |  |
| Colon Cancer                    |           |       |                                       |       |       |       |       |      |      |      |      |      |                |           |               |  |
| COLO 205                        | 0.346     | 1.304 | 1.335                                 | 1.285 | 1.331 | 1.127 | 0.346 | 103  | 98   | 103  | 82   | .    | 2.44E-6        | > 1.00E-5 | > 1.00E-5     |  |
| HCC-2998                        | 0.462     | 1.522 | 1.503                                 | 1.485 | 1.463 | 1.424 | 0.200 | 98   | 97   | 95   | 91   | -57  | 1.89E-6        | 4.13E-6   | 9.01E-6       |  |
| HCT-116                         | 0.266     | 1.428 | 1.463                                 | 1.401 | 1.431 | 1.409 | 0.448 | 103  | 98   | 100  | 98   | 16   | 3.84E-6        | > 1.00E-5 | > 1.00E-5     |  |
| HCT-15                          | 0.460     | 1.907 | 2.008                                 | 1.908 | 1.928 | 1.878 | 1.090 | 107  | 100  | 101  | 98   | 44   | 7.61E-6        | > 1.00E-5 | > 1.00E-5     |  |
| HT29                            | 0.224     | 1.161 | 1.178                                 | 1.201 | 1.176 | 1.145 | 0.270 | 102  | 104  | 102  | 98   | 5    | 3.29E-6        | > 1.00E-5 | > 1.00E-5     |  |
| KM12                            | 0.355     | 1.351 | 1.358                                 | 1.292 | 1.391 | 1.374 | 0.661 | 101  | 94   | 104  | 102  | 31   | 5.38E-6        | > 1.00E-5 | > 1.00E-5     |  |
| SW-620                          | 0.201     | 0.984 | 1.001                                 | 0.947 | 0.914 | 0.847 | 0.438 | 102  | 95   | 91   | 83   | 30   | 4.18E-6        | > 1.00E-5 | > 1.00E-5     |  |
| CNS Cancer                      |           |       |                                       |       |       |       |       |      |      |      |      |      |                |           |               |  |
| SF-268                          | 0.585     | 1.492 | 1.539                                 | 1.561 | 1.579 | 1.568 | 0.820 | 105  | 108  | 110  | 108  | 26   | 5.09E-6        | > 1.00E-5 | > 1.00E-5     |  |
| SF-295                          | 0.580     | 1.695 | 1.617                                 | 1.681 | 1.660 | 1.619 | 0.988 | 93   | 99   | 97   | 93   | 37   | 5.78E-6        | > 1.00E-5 | > 1.00E-5     |  |
| SF-539                          | 0.500     | 1.143 | 1.151                                 | 1.095 | 1.147 | 1.117 | 0.307 | 101  | 93   | 101  | 96   | -39  | 2.19E-6        | 5.16E-6   | > 1.00E-5     |  |
| SNB-19                          | 0.754     | 1.561 | 1.631                                 | 1.561 | 1.544 | 1.583 | 1.421 | 109  | 100  | 98   | 103  | 83   | > 1.00E-5      | > 1.00E-5 | > 1.00E-5     |  |
| SNB-75                          | 0.625     | 0.979 | 1.008                                 | 1.005 | 1.037 | 1.013 | 0.287 | 108  | 107  | 116  | 110  | -54  | 2.31E-6        | 4.67E-6   | 9.43E-6       |  |
| U251                            | 0.347     | 1.378 | 1.375                                 | 1.293 | 1.315 | 1.304 | 0.451 | 100  | 92   | 94   | 93   | 10   | 3.29E-6        | > 1.00E-5 | > 1.00E-5     |  |
| Melanoma                        |           |       |                                       |       |       |       |       |      |      |      |      |      |                |           |               |  |
| MALME-3M                        | 0.656     | 1.323 | 1.294                                 | 1.312 | 1.295 | 1.325 | 0.947 | 96   | 98   | 96   | 100  | 44   | 7.72E-6        | > 1.00E-5 | > 1.00E-5     |  |
| M14                             | 0.225     | 0.827 | 0.802                                 | 0.676 | 0.819 | 0.872 | 0.405 | 96   | 75   | 99   | 108  | 30   | 5.50E-6        | > 1.00E-5 | > 1.00E-5     |  |
| MDA-MB-435                      | 0.409     | 1.463 | 1.480                                 | 1.484 | 1.512 | 1.525 | 0.697 | 102  | 102  | 105  | 106  | 27   | 5.14E-6        | > 1.00E-5 | > 1.00E-5     |  |
| SK-MEL-2                        | 0.632     | 1.046 | 1.055                                 | 1.084 | 1.069 | 1.093 | 0.397 | 102  | 109  | 106  | 111  | -37  | 2.59E-6        | 5.61E-6   | > 1.00E-5     |  |
| SK-MEL-28                       | 0.481     | 1.152 | 1.157                                 | 1.153 | 1.161 | 1.274 | 0.615 | 101  | 100  | 101  | 118  | 20   | 4.94E-6        | > 1.00E-5 | > 1.00E-5     |  |
| SK-MEL-5                        | 0.396     | 1.953 | 1.850                                 | 1.856 | 1.843 | 1.839 | 0.565 | 93   | 94   | 93   | 93   | 11   | 3.32E-6        | > 1.00E-5 | > 1.00E-5     |  |
| UACC-257                        | 0.527     | 1.403 | 1.374                                 | 1.497 | 1.498 | 1.484 | 0.798 | 97   | 111  | 111  | 109  | 31   | 5.71E-6        | > 1.00E-5 | > 1.00E-5     |  |
| Ovarian Cancer                  |           |       |                                       |       |       |       |       |      |      |      |      |      |                |           |               |  |
| IGROV1                          | 0.483     | 1.623 | 1.642                                 | 1.628 | 1.477 | 1.494 | 0.317 | 102  | 101  | 87   | 89   | -35  | 2.06E-6        | 5.25E-6   | > 1.00E-5     |  |
| OVCAR-3                         | 0.563     | 1.497 | 1.497                                 | 1.413 | 1.434 | 1.465 | 0.610 | 100  | 91   | 93   | 97   | 5    | 3.22E-6        | > 1.00E-5 | > 1.00E-5     |  |
| OVCAR-4                         | 0.399     | 1.003 | 1.015                                 | 0.974 | 1.018 | 0.952 | 0.374 | 102  | 95   | 102  | 92   | -6   | 2.66E-6        | 8.63E-6   | > 1.00E-5     |  |
| OVCAR-5                         | 0.554     | 1.277 | 1.273                                 | 1.285 | 1.272 | 1.291 | 0.824 | 99   | 101  | 99   | 102  | 37   | 6.36E-6        | > 1.00E-5 | > 1.00E-5     |  |
| OVCAR-8                         | 0.278     | 1.101 | 1.075                                 | 1.066 | 1.049 | 1.003 | 0.373 | 97   | 96   | 94   | 88   | 12   | 3.15E-6        | > 1.00E-5 | > 1.00E-5     |  |
| NCI/ADR-RES                     | 0.392     | 1.087 | 1.062                                 | 1.054 | 1.082 | 1.046 | 0.710 | 96   | 95   | 99   | 94   | 46   | 8.16E-6        | > 1.00E-5 | > 1.00E-5     |  |
| SK-OV-3                         | 0.600     | 1.211 | 1.138                                 | 1.179 | 1.161 | 1.154 | 0.594 | 88   | 95   | 92   | 91   | -1   | 2.78E-6        | 9.73E-6   | > 1.00E-5     |  |
| Renal Cancer                    |           |       |                                       |       |       |       |       |      |      |      |      |      |                |           |               |  |
| 786-0                           | 0.268     | 1.199 | 1.205                                 | 1.110 | 1.178 | 1.141 | 0.172 | 101  | 90   | 98   | 94   | -36  | 2.18E-6        | 5.30E-6   | > 1.00E-5     |  |
| A498                            | 0.920     | 1.449 | 1.380                                 | 1.358 | 1.409 | 1.448 | 0.259 | 87   | 83   | 92   | 100  | -72  | 1.95E-6        | 3.81E-6   | 7.46E-6       |  |
| ACHN                            | 0.668     | 1.927 | 1.923                                 | 1.937 | 1.961 | 1.968 | 0.642 | 100  | 101  | 103  | 103  | -4   | 3.14E-6        | 9.21E-6   | > 1.00E-5     |  |
| CAKI-1                          | 0.553     | 1.572 | 1.577                                 | 1.627 | 1.544 | 1.493 | 0.954 | 101  | 105  | 97   | 92   | 39   | 6.28E-6        | > 1.00E-5 | > 1.00E-5     |  |
| RXF 393                         | 0.556     | 1.141 | 1.206                                 | 1.202 | 1.191 | 1.180 | 0.595 | 111  | 110  | 109  | 107  | 7    | 3.68E-6        | > 1.00E-5 | > 1.00E-5     |  |
| SN12C                           | 0.477     | 1.370 | 1.355                                 | 1.202 | 1.346 | 1.286 | 0.675 | 98   | 81   | 97   | 91   | 22   | 3.92E-6        | > 1.00E-5 | > 1.00E-5     |  |
| TK-10                           | 1.168     | 1.632 | 1.655                                 | 1.785 | 1.757 | 1.857 | 1.597 | 105  | 133  | 127  | 149  | 92   | > 1.00E-5      | > 1.00E-5 | > 1.00E-5     |  |
| UO-31                           | 0.683     | 1.979 | 1.928                                 | 1.921 | 1.911 | 1.900 | 0.372 | 96   | 96   | 95   | 94   | -46  | 2.07E-6        | 4.72E-6   | > 1.00E-5     |  |
| Prostate Cancer                 |           |       |                                       |       |       |       |       |      |      |      |      |      |                |           |               |  |
| PC-3                            | 0.622     | 1.893 | 1.773                                 | 1.850 | 1.795 | 1.695 | 0.675 | 91   | 97   | 92   | 84   | 4    | 2.68E-6        | > 1.00E-5 | > 1.00E-5     |  |
| DU-145                          | 1.129     | 2.399 | 2.414                                 | 2.428 | 2.364 | 2.460 | 2.069 | 101  | 102  | 97   | 105  | 74   | > 1.00E-5      | > 1.00E-5 | > 1.00E-5     |  |
| Breast Cancer                   |           |       |                                       |       |       |       |       |      |      |      |      |      |                |           |               |  |
| MCF7                            | 0.469     | 1.939 | 1.866                                 | 1.879 | 1.956 | 1.876 | 0.864 | 95   | 96   | 101  | 96   | 27   | 4.62E-6        | > 1.00E-5 | > 1.00E-5     |  |
| MDA-MB-231/ATCC                 | 0.363     | 0.804 | 0.818                                 | 0.679 | 0.802 | 0.745 | 0.314 | 103  | 72   | 99   | 87   | -14  | 2.32E-6        | 7.33E-6   | > 1.00E-5     |  |
| HS 578T                         | 0.524     | 1.269 | 1.263                                 | 1.255 | 1.303 | 1.265 | 0.692 | 99   | 98   | 105  | 100  | 23   | 4.40E-6        | > 1.00E-5 | > 1.00E-5     |  |
| MDA-N                           | 0.233     | 1.024 | 1.122                                 | 0.962 | 1.071 | 0.866 | 0.518 | 112  | 92   | 106  | 80   | 36   | 4.80E-6        | > 1.00E-5 | > 1.00E-5     |  |
| BT-549                          | 0.597     | 1.354 | 1.319                                 | 1.273 | 1.214 | 1.277 | 0.348 | 95   | 89   | 82   | 90   | -42  | 2.01E-6        | 4.81E-6   | > 1.00E-5     |  |
| T-47D                           | 0.553     | 1.089 | 1.076                                 | 1.140 | 1.213 | 1.167 | 0.859 | 98   | 110  | 123  | 115  | 57   | > 1.00E-5      | > 1.00E-5 | > 1.00E-5     |  |

Table S12. One dose mean graph for 15.

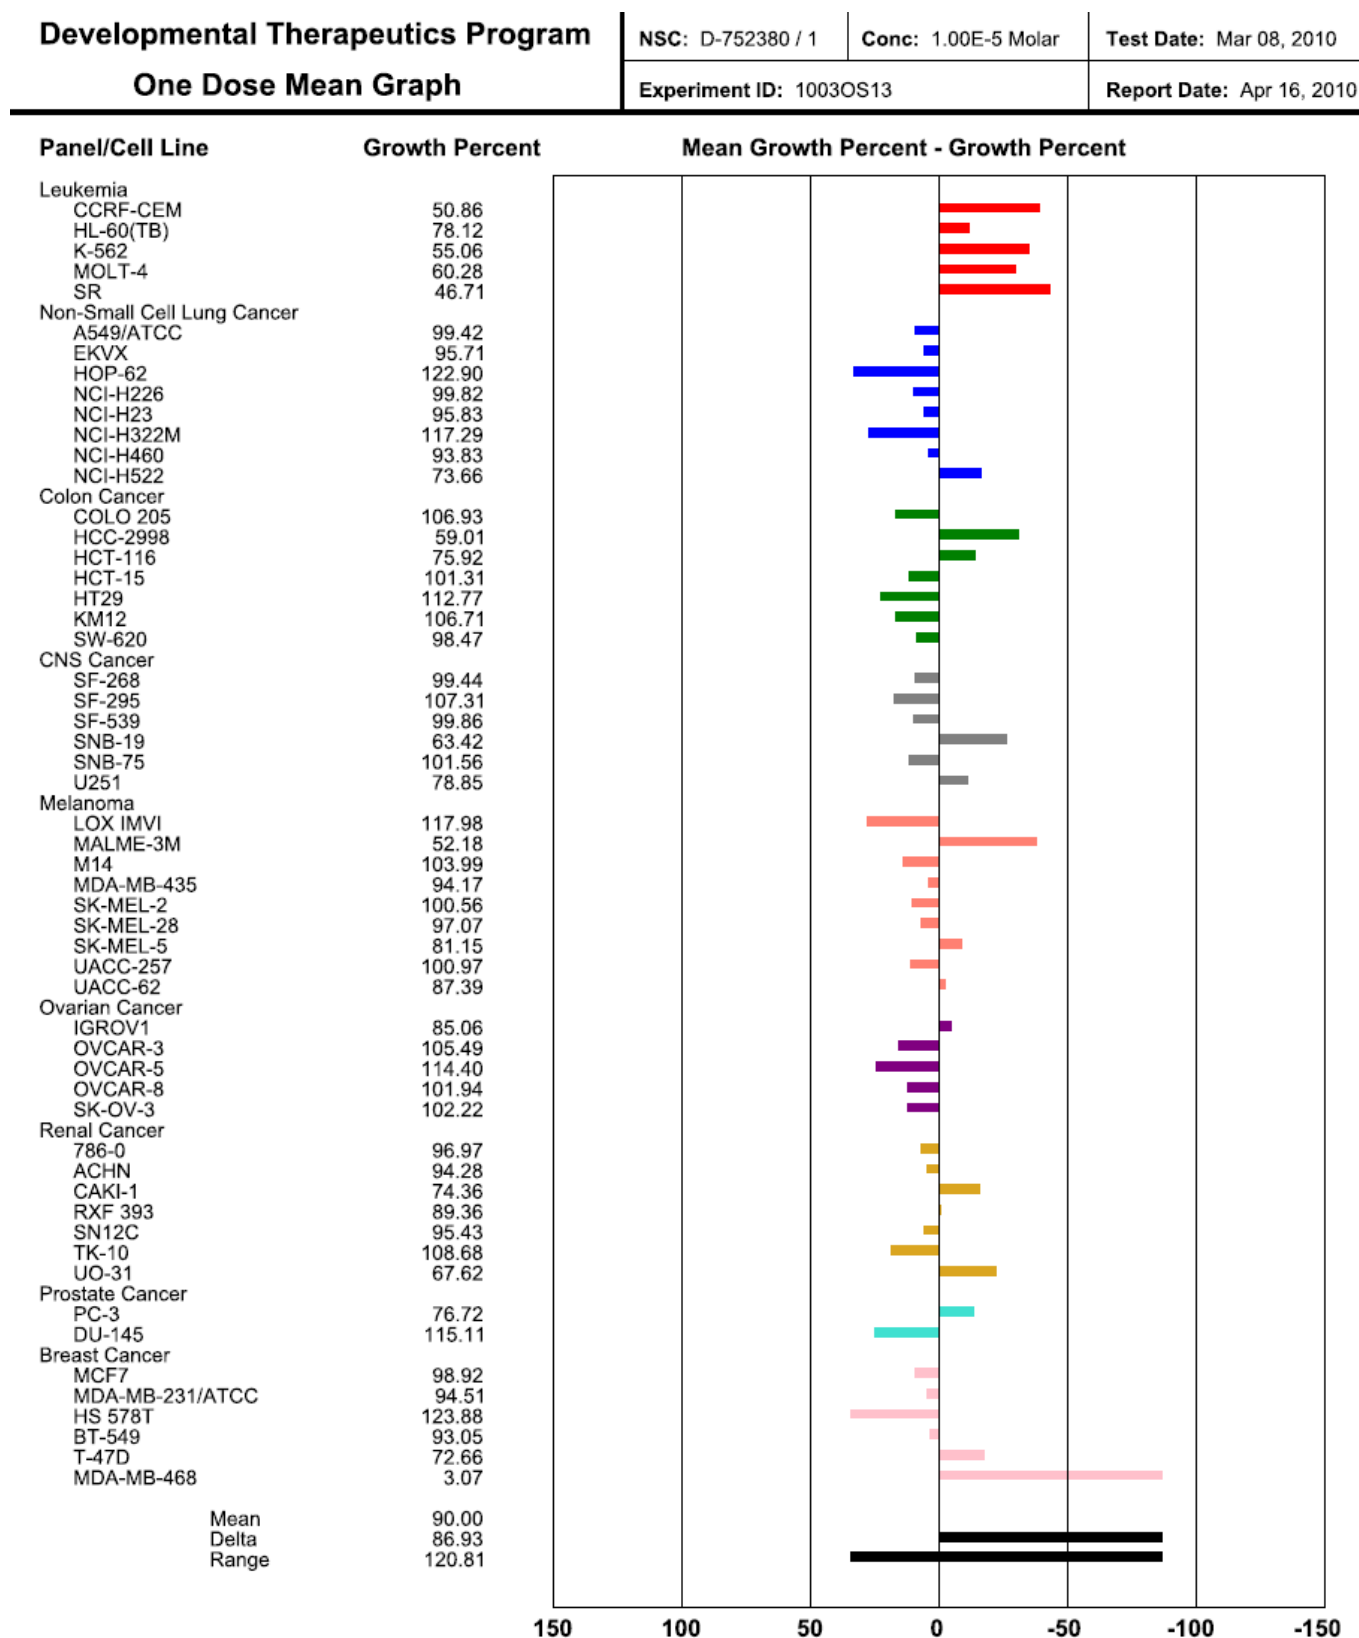

Figure S11. Microfilament effects of **10** in HCT-116 and HeLa cells.

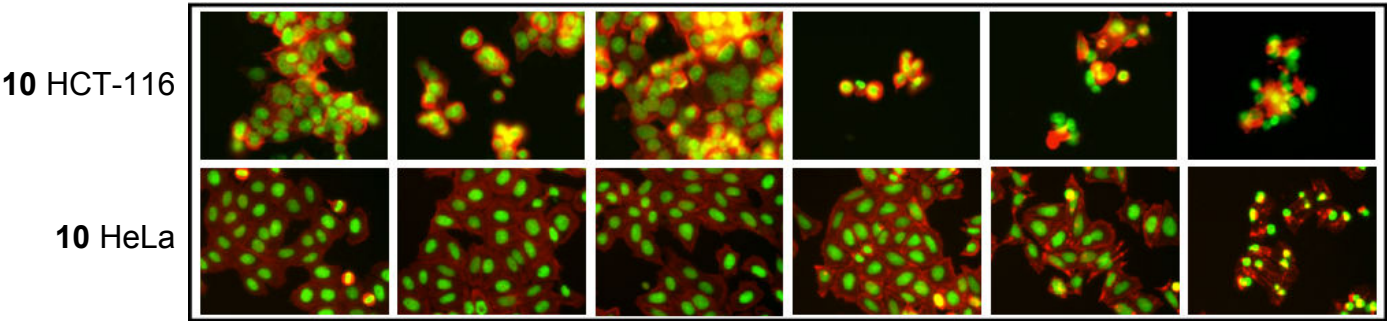

Figure S12. Above water photo of 00101.

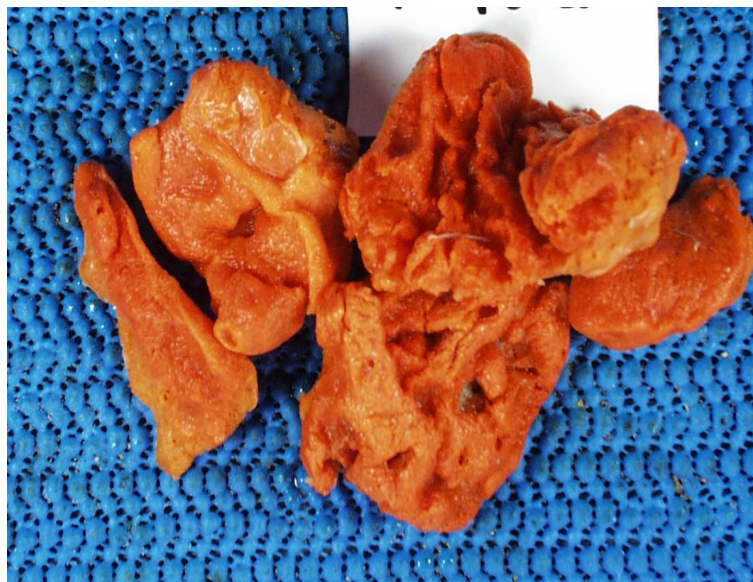

Supplement: Supplementary file 1 [file 4340986]
